# Supplementary material
Source: PubMed Central journal article supplement (PMC6854827)
Supplement: ao9b02679_si_001.pdf [file ao9b02679_si_001.pdf]

## Supporting Information

*For*

Concise and Efficient Synthesis of Indole-Indolone Scaffolds through MeOTf-Induced Annulation of *N*-(2-Cyanoaryl)indoles

Song Zou,<sup>†</sup> Yu Liu,<sup>‡</sup> Chanjuan Xi,<sup>\*†</sup>

<sup>†</sup>MOE Key Laboratory of Bioorganic Phosphorus Chemistry & Chemical Biology, Department of Chemistry, Tsinghua University, Beijing 100084, China

<sup>‡</sup>Naval Logistics Academy, Tianjin 300450, China

Email: cjxi@tsinghua.edu.cn

### List of the contents

|                                                                                                                   |     |
|-------------------------------------------------------------------------------------------------------------------|-----|
| 1. Optimized the Hydrolyzation Reaction Conditions.....                                                           | S2  |
| 2. NOESY ( Nuclear Overhauser Effect Spectroscopy <b>3b</b> and <b>3m</b> ).....                                  | S3  |
| 3. Copies of <sup>1</sup> H, <sup>13</sup> C{ <sup>1</sup> H}, and <sup>19</sup> F NMR Spectra.....               | S5  |
| 3-1 Copies of <sup>1</sup> H NMR Spectra for Starting Materials <b>1</b> .....                                    | S5  |
| 3-2 Copies of <sup>1</sup> H, <sup>13</sup> C{ <sup>1</sup> H}, and <sup>19</sup> F NMR Spectra for Products..... | S26 |

## 1. Optimized the hydrolyzation reaction conditions

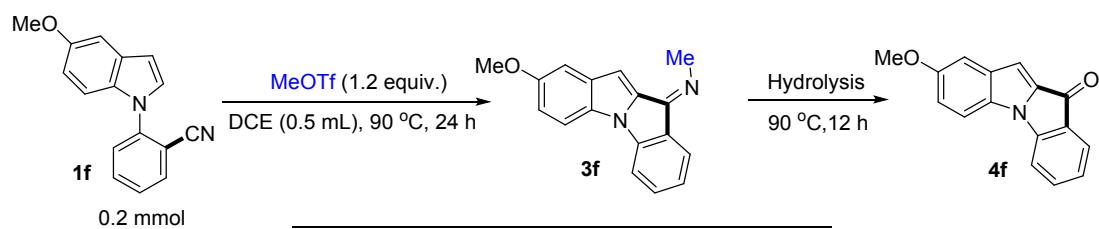

| Entry | Hydrolysis                            | Yield (%) |           |
|-------|---------------------------------------|-----------|-----------|
|       |                                       | <b>3f</b> | <b>4f</b> |
| 1     | Na <sub>2</sub> CO <sub>3</sub> (.aq) | 63        | 24        |
| 2     | K <sub>2</sub> CO <sub>3</sub> (.aq)  | 58        | 26        |
| 3     | Na <sub>2</sub> OAc (.aq)             | 54        | 25        |
| 4     | NaOH (.aq)                            | 56        | 28        |
| 5     | 1M HCl                                | 49        | 30        |
| 6     | 3M HCl                                | 32        | 47        |
| 7     | 6M HCl                                | 0         | 87        |

Figure S1. Optimized the hydrolyzation reaction conditions

We further explored the hydrolyzation of reaction conditions to give the final target **4f**. Acidic and basic conditions were applied from entry 1 to entry 7 after first step. Finally, the best hydrolyzation reaction condition in hand is entry 7 achieving 87% isolated yield.

## 2. NOESY ( Nuclear Overhauser Effect Spectroscopy 3b and 3m)

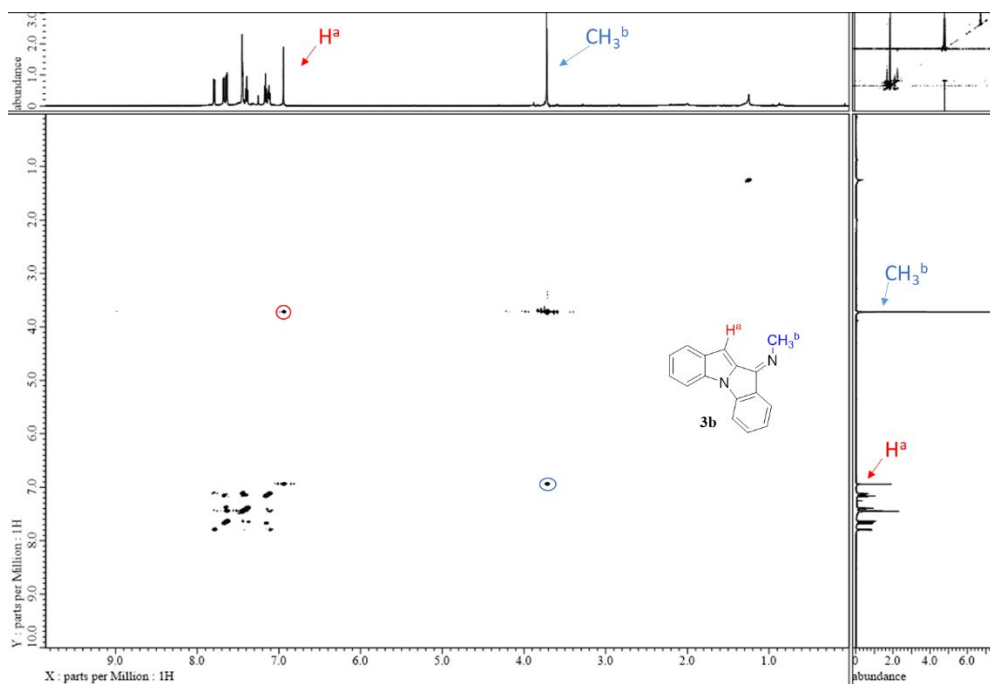

Figure S2. NOESY for **3b**

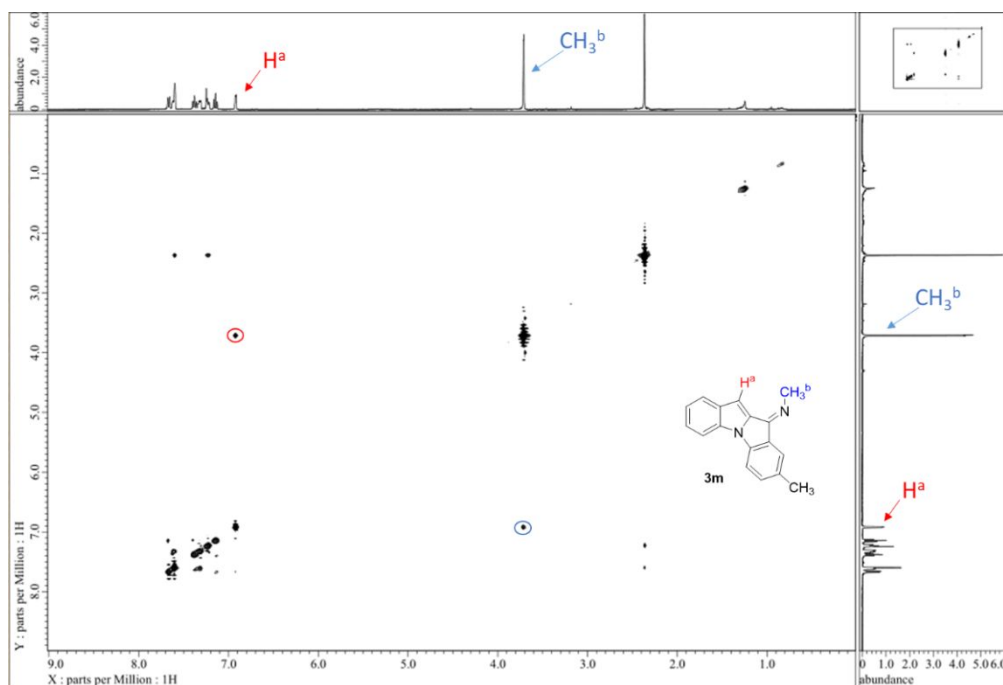

Figure S3. NOESY for **3m**

To decide the configuration of C=N bonds in compound **3**, we also did the NOESY experiment. The strong coupling was demonstrated between  $H^a$  and  $H_3^b$  in the

compound **3b** and **3m** from NOESY experiment chart, hence, the configuration of C=N bonds in compound **3** is *Z* configuration.

### 3. Copies of $^1\text{H}$ , $^{13}\text{C}\{^1\text{H}\}$ , and $^{19}\text{F}$ NMR Spectra

*3-1 Copies of  $^1\text{H}$  NMR Spectra for Starting Materials 1 and Copies of  $^{13}\text{C}$*

*NMR Spectra for Starting Materials 1.*

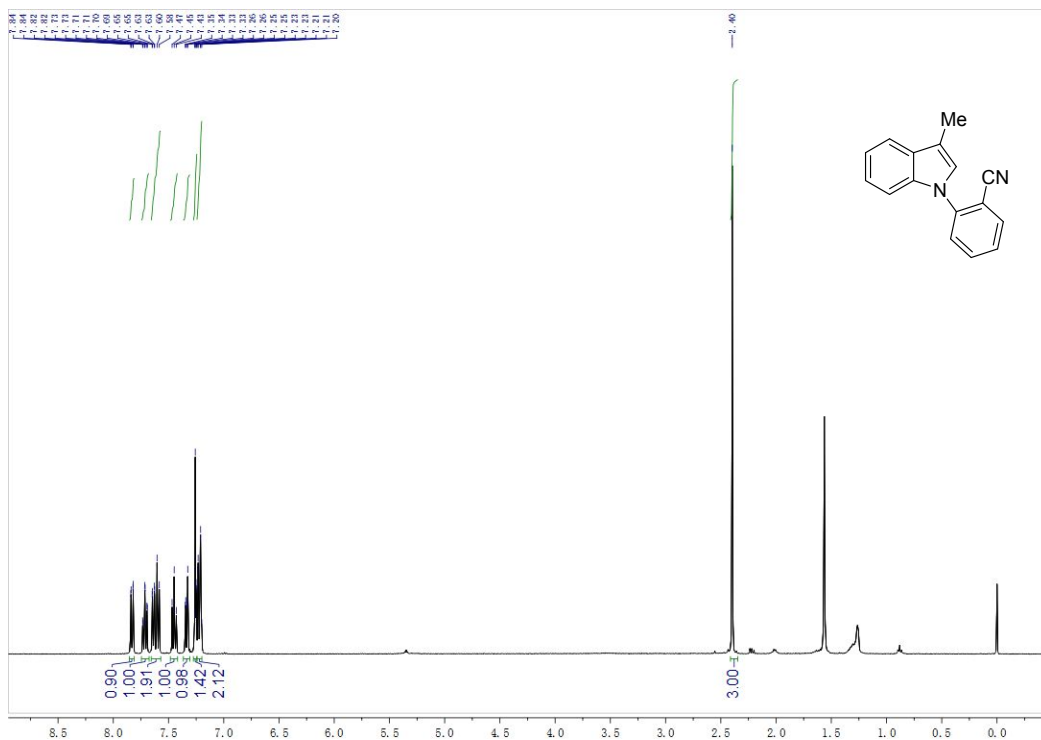

Figure S4.  $^1\text{H}$  NMR for compound **1a**

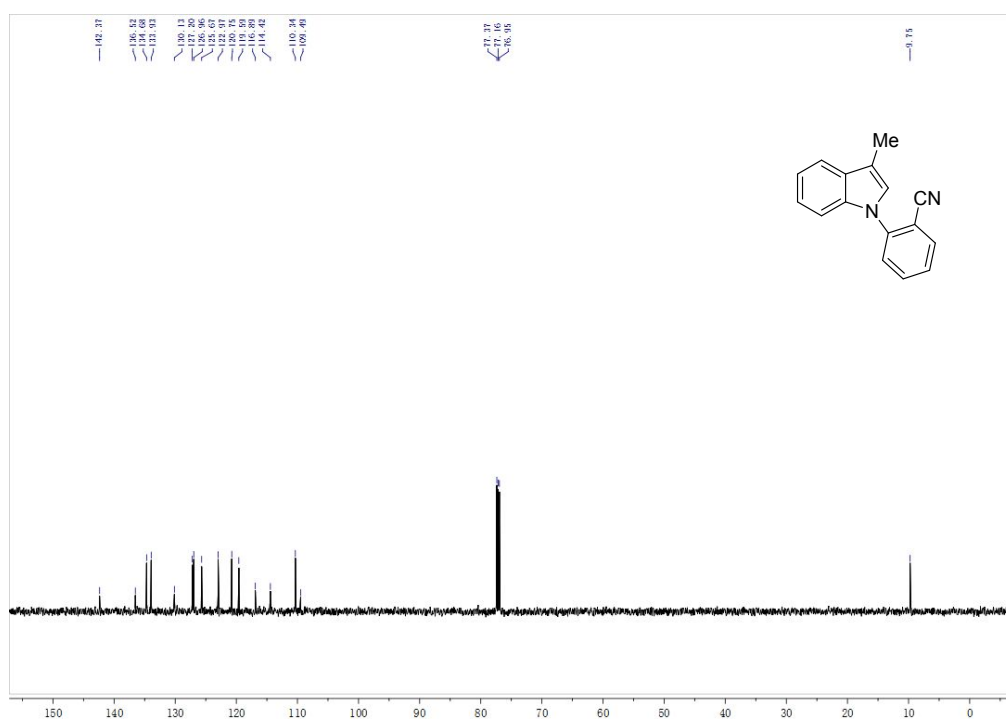

Figure S5.  $^{13}\text{C}\{^1\text{H}\}$  NMR for compound **1a**

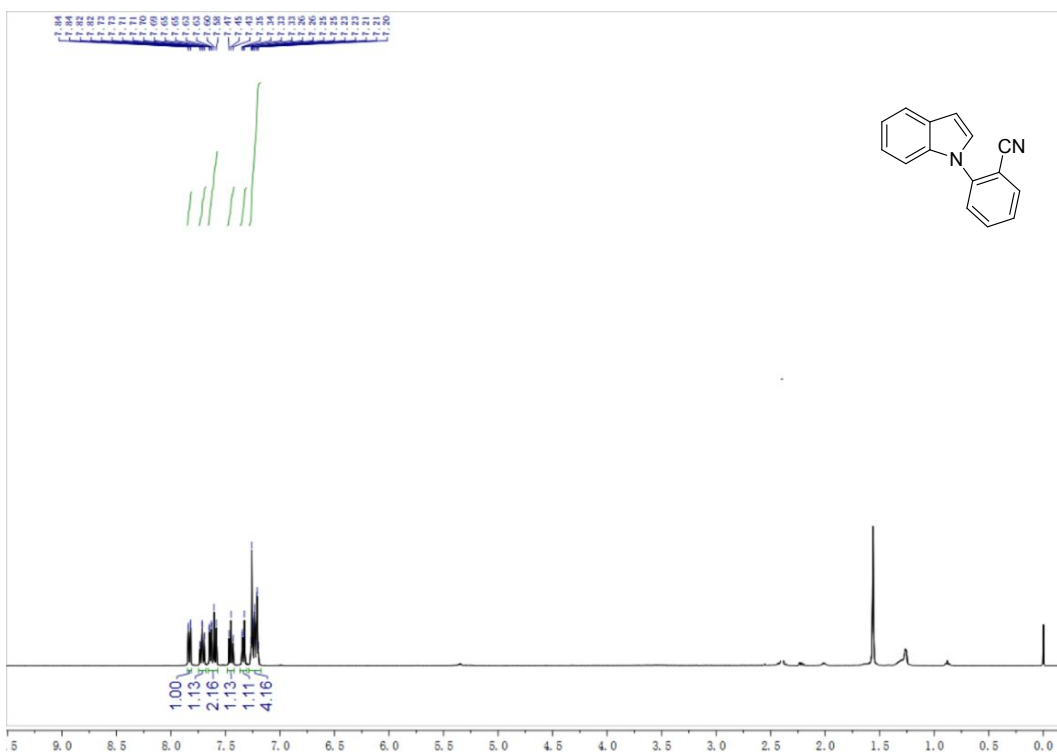

Figure S6. <sup>1</sup>H NMR for compound **1b**

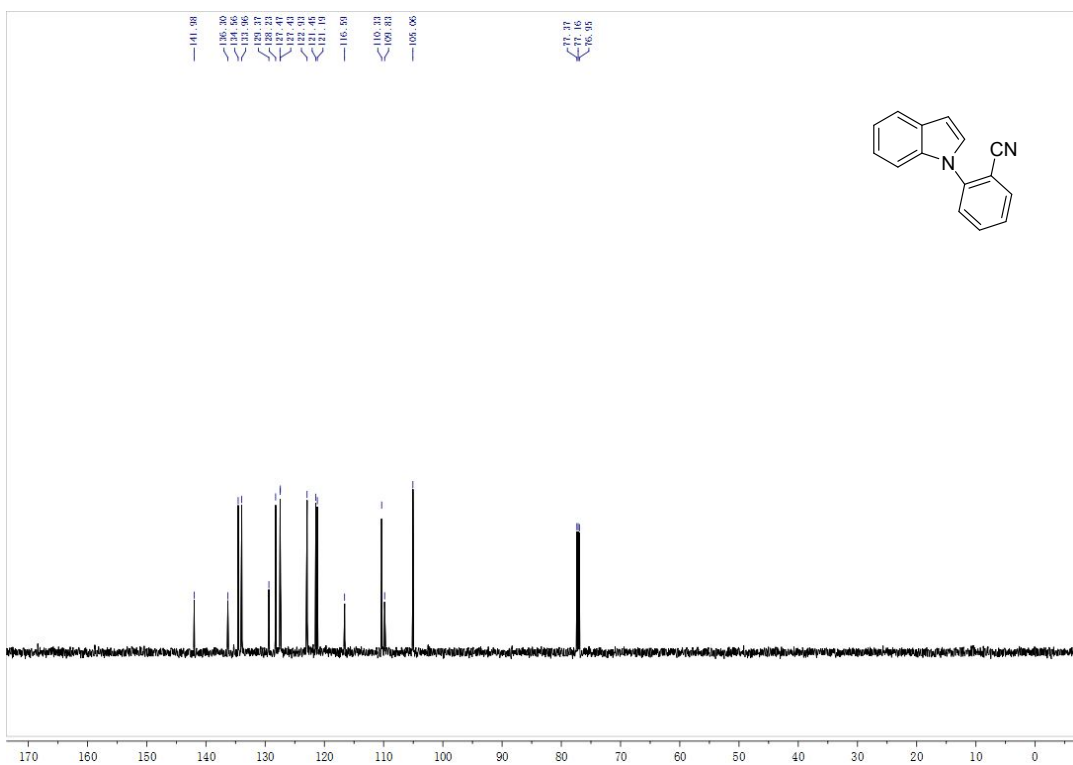

Figure S7. <sup>13</sup>C {<sup>1</sup>H} NMR for compound **1b**

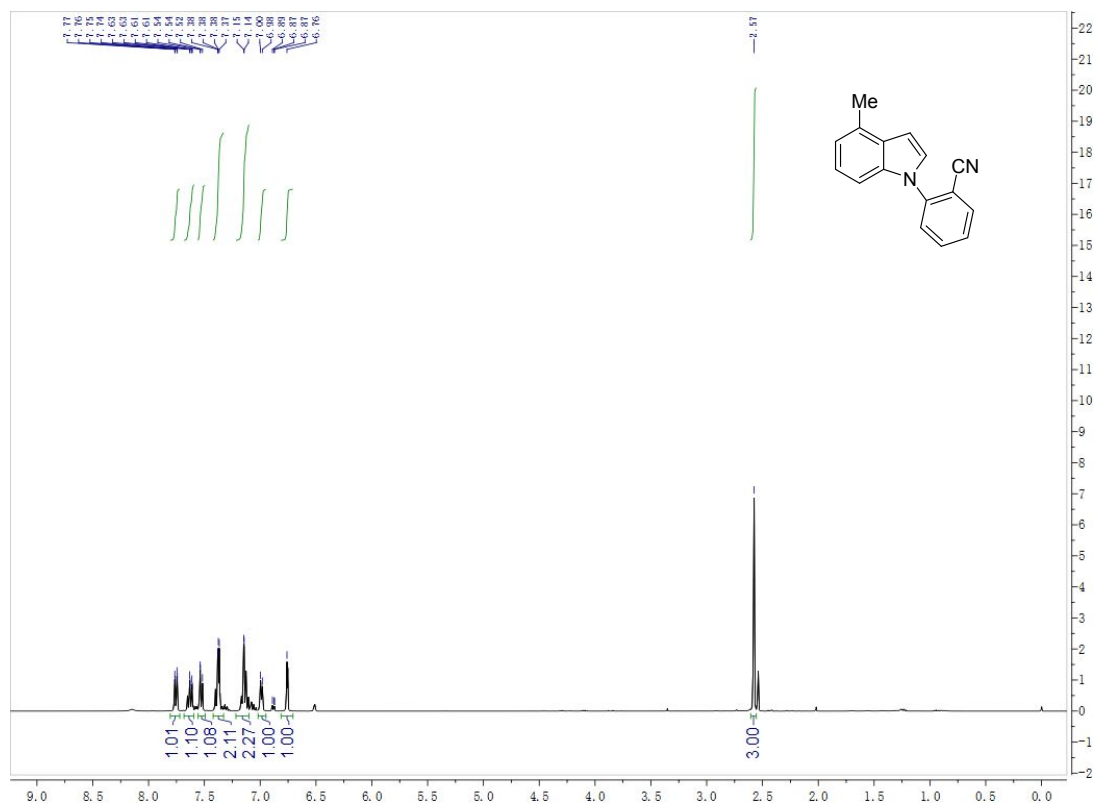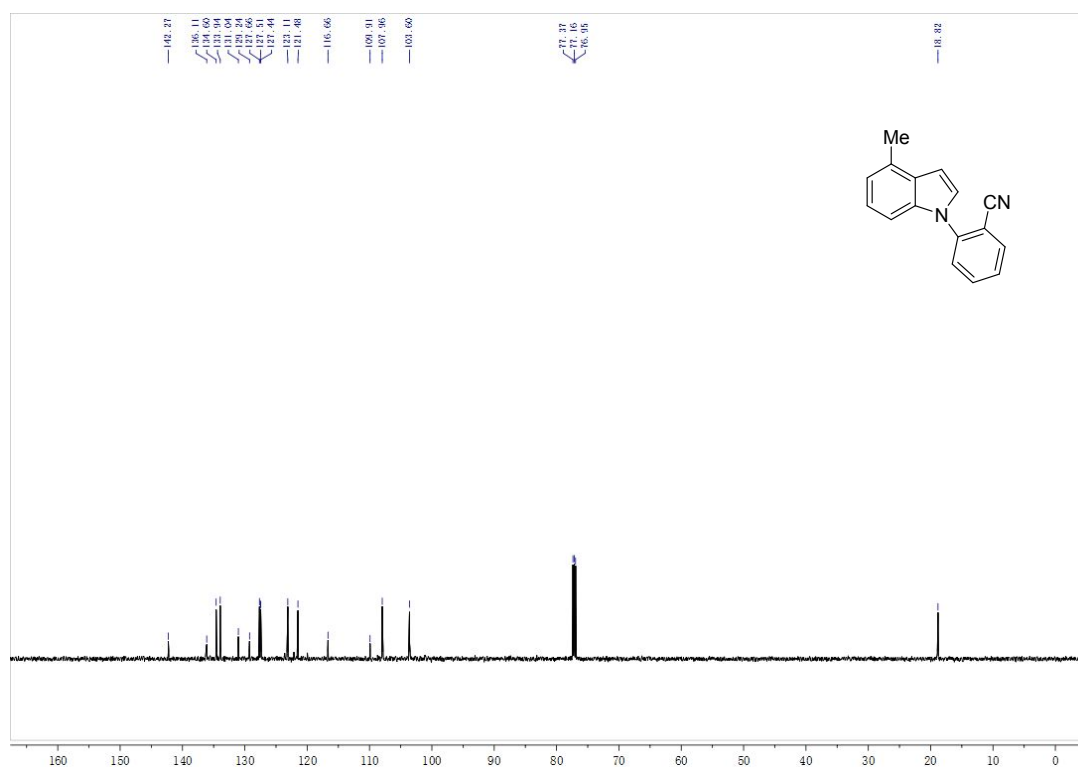

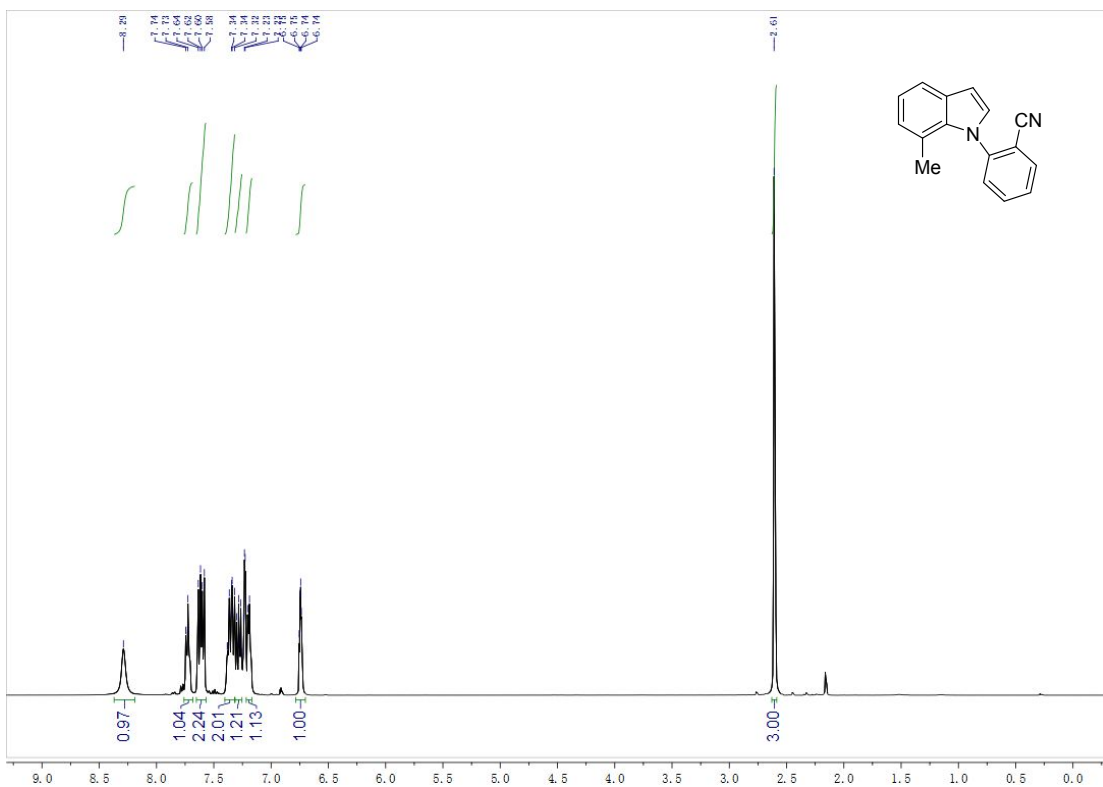

Figure S10.  $^1\text{H}$  NMR for compound **1d**

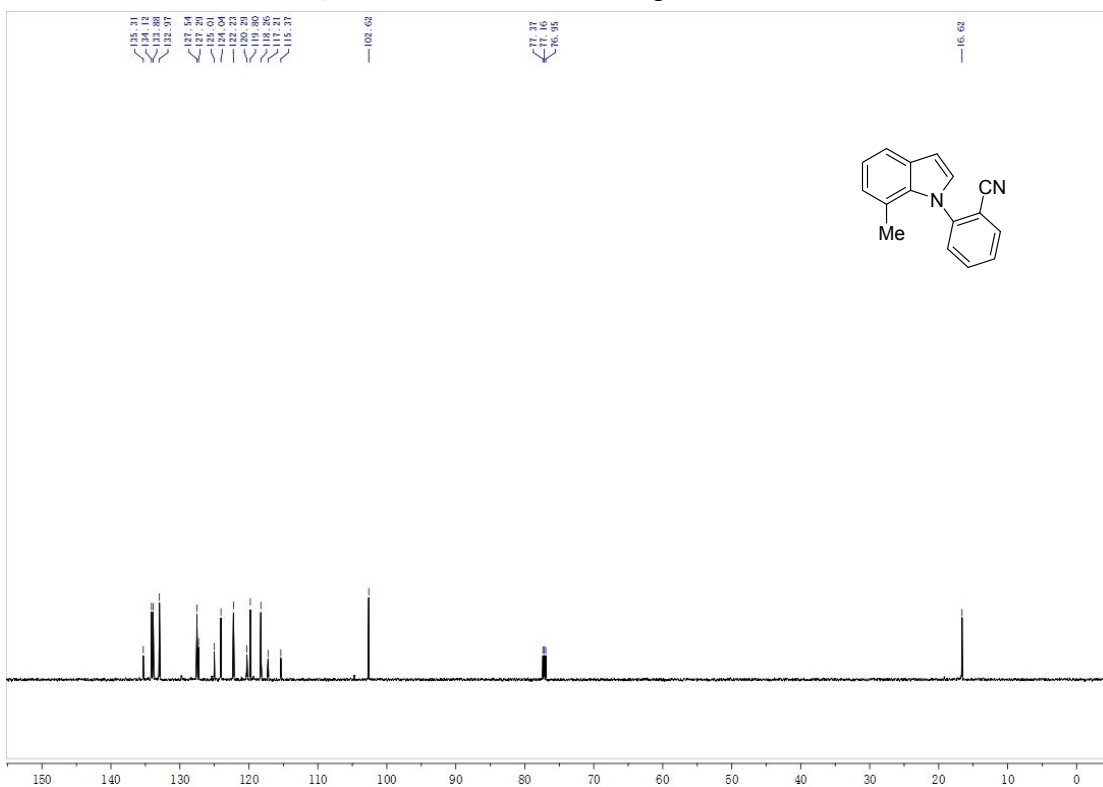

Figure S11.  $^{13}\text{C}\{^1\text{H}\}$  NMR for compound **1d**



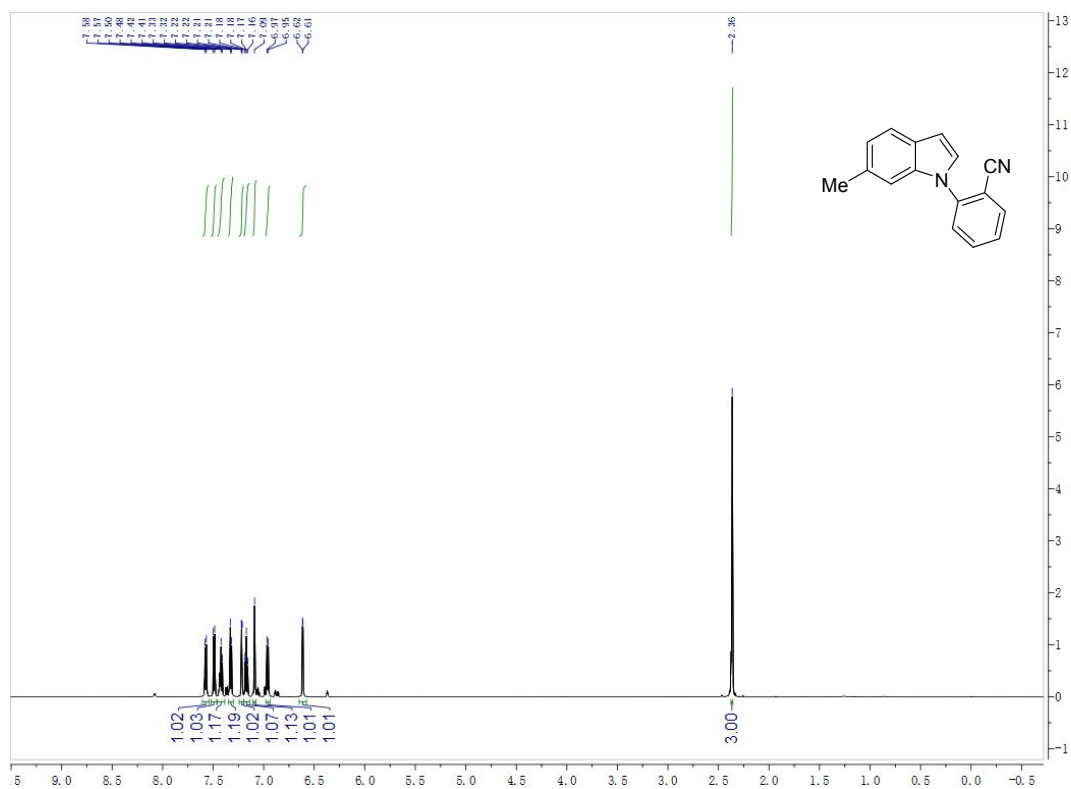

Figure S12.  $^1\text{H}$  NMR for compound **1e**

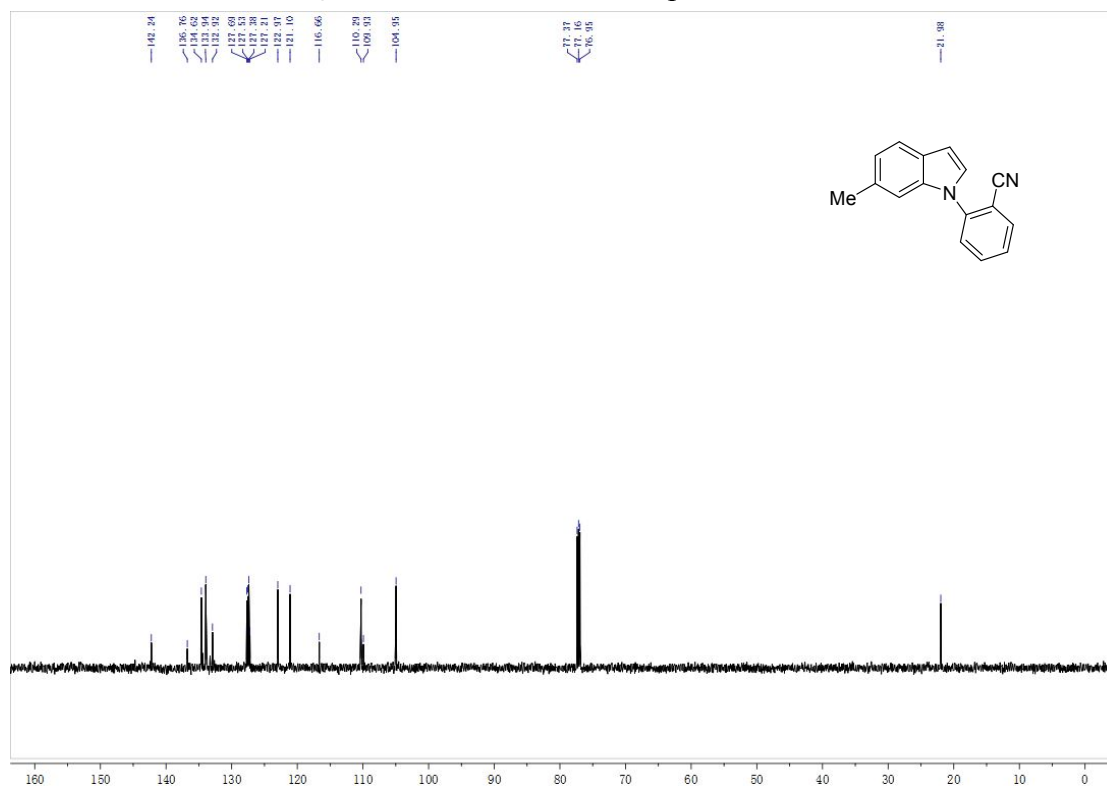

Figure S13.  $^{13}\text{C}\{^1\text{H}\}$  NMR for compound **1e**

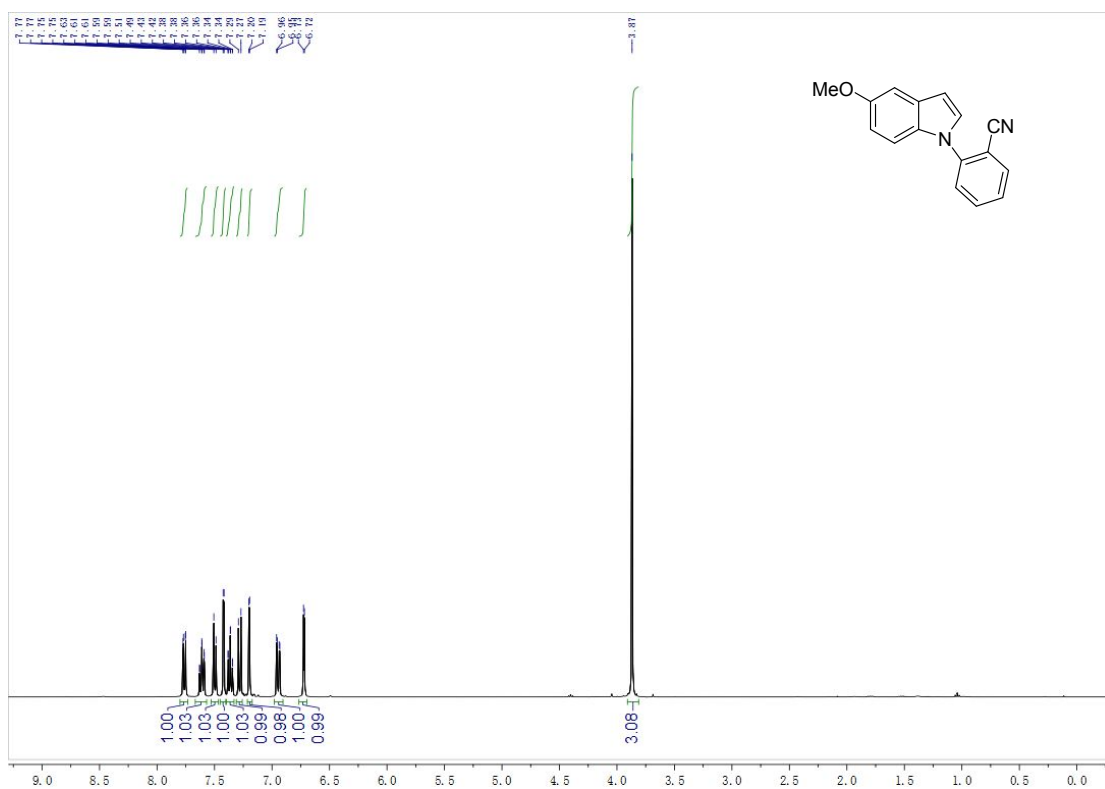

Figure S14. <sup>1</sup>H NMR for compound **1f**

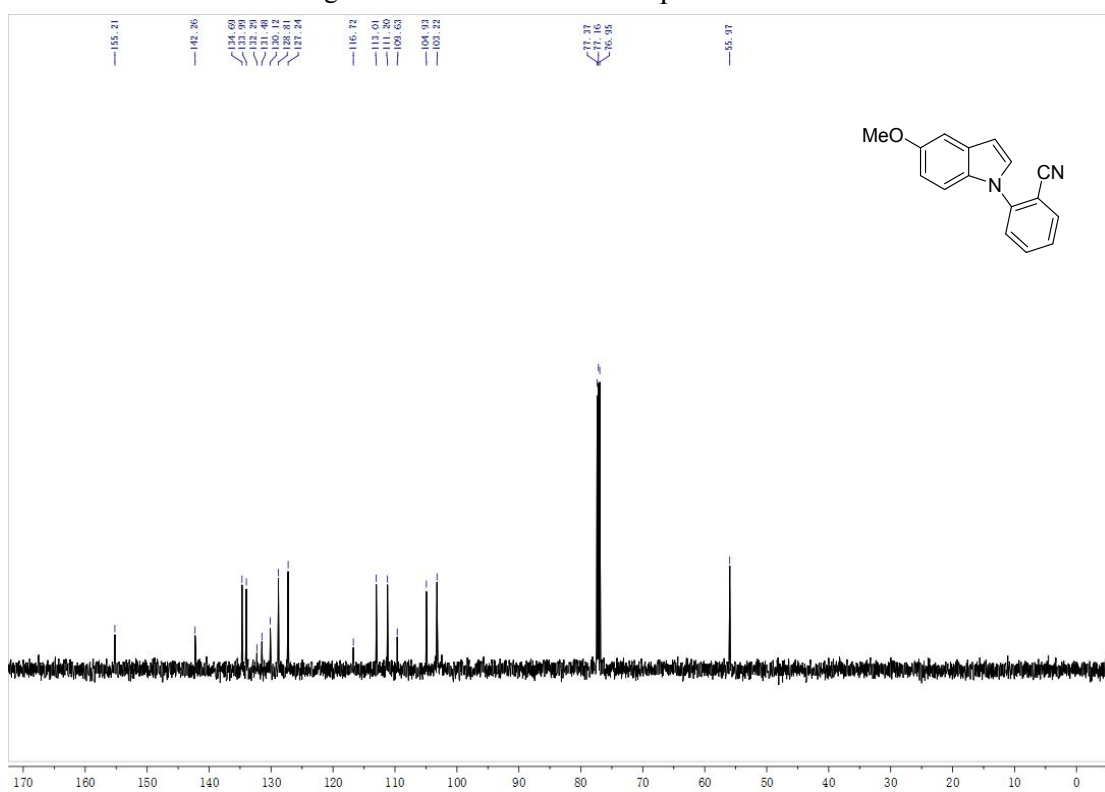

Figure S15. <sup>13</sup>C{<sup>1</sup>H} NMR for compound **1f**

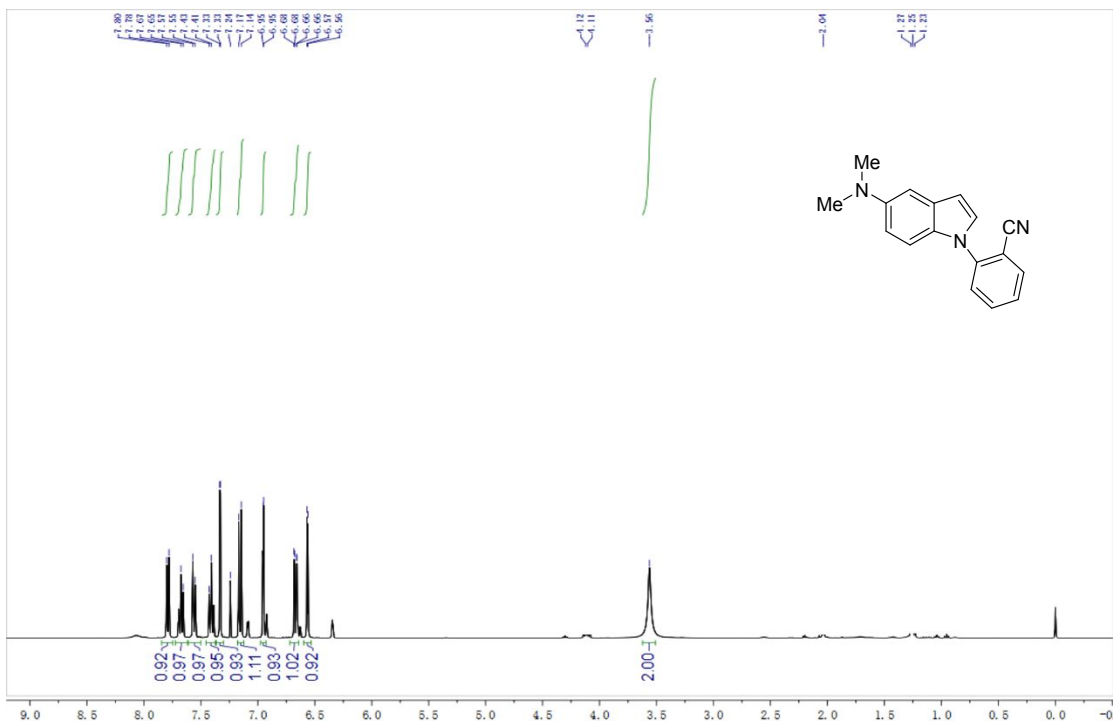

Figure S16.  $^1\text{H}$  NMR for compound **1g**

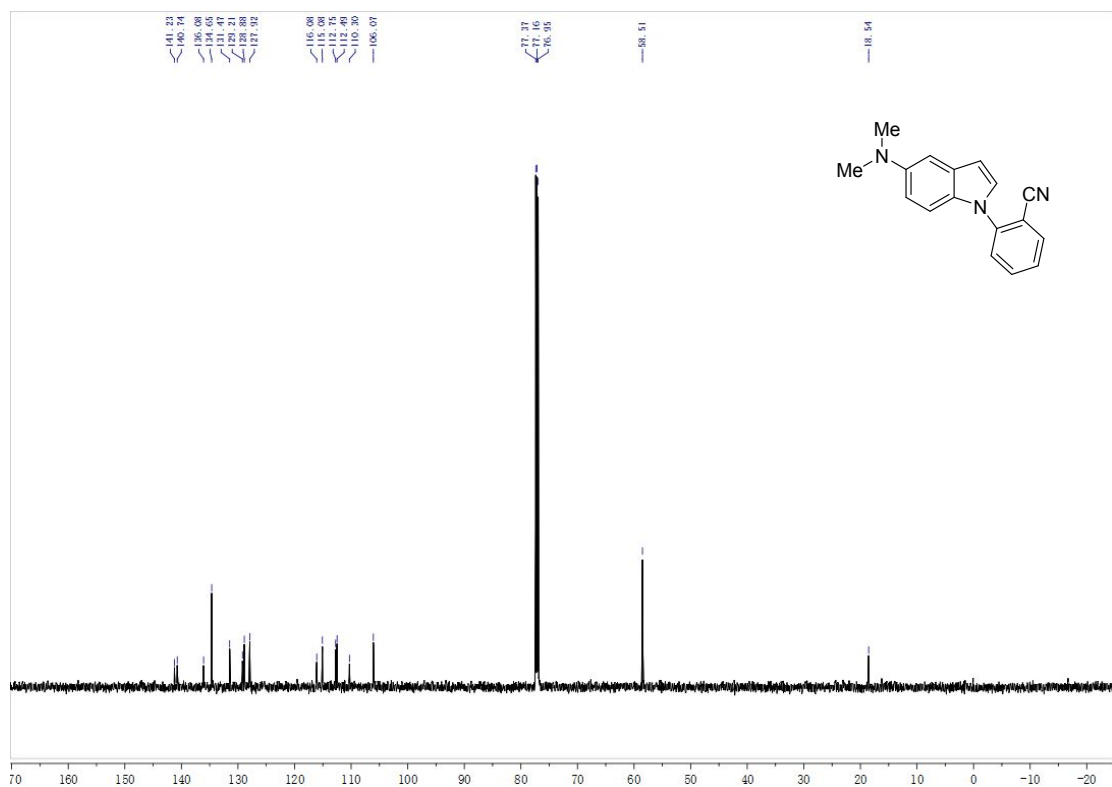

Figure S17.  $^{13}\text{C}\{^1\text{H}\}$  NMR for compound **1g**

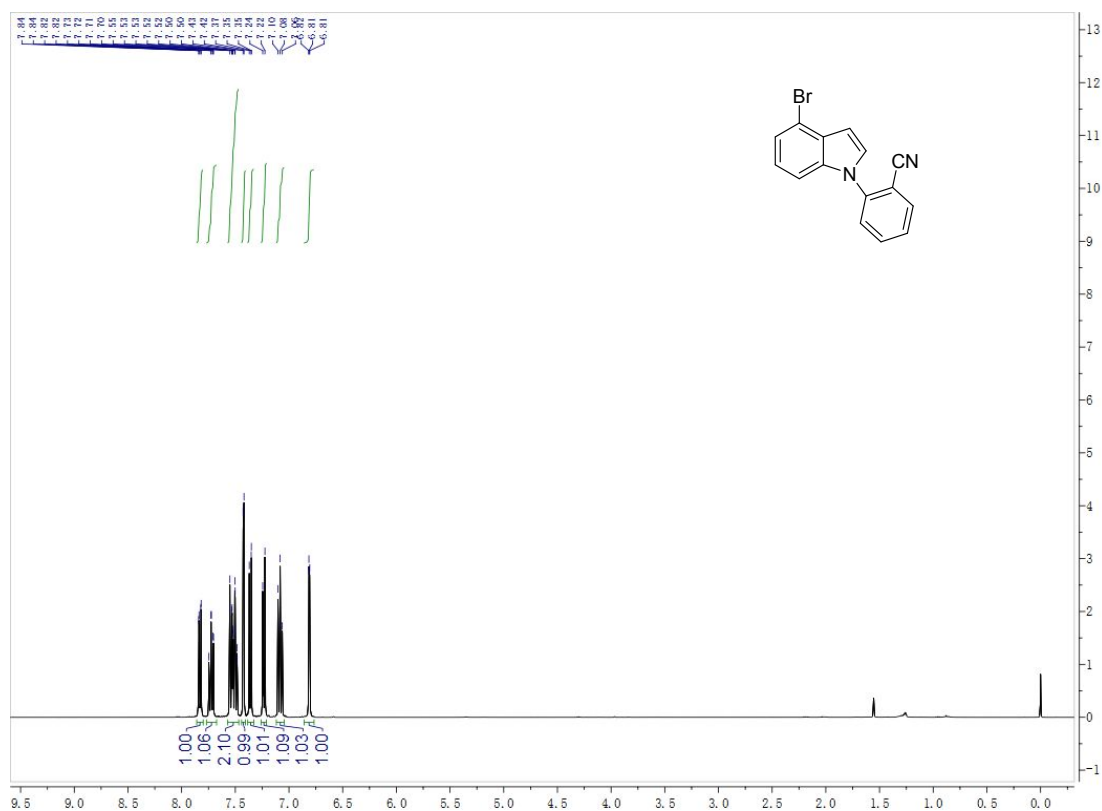

Figure S18. <sup>1</sup>H NMR for compound **1h**

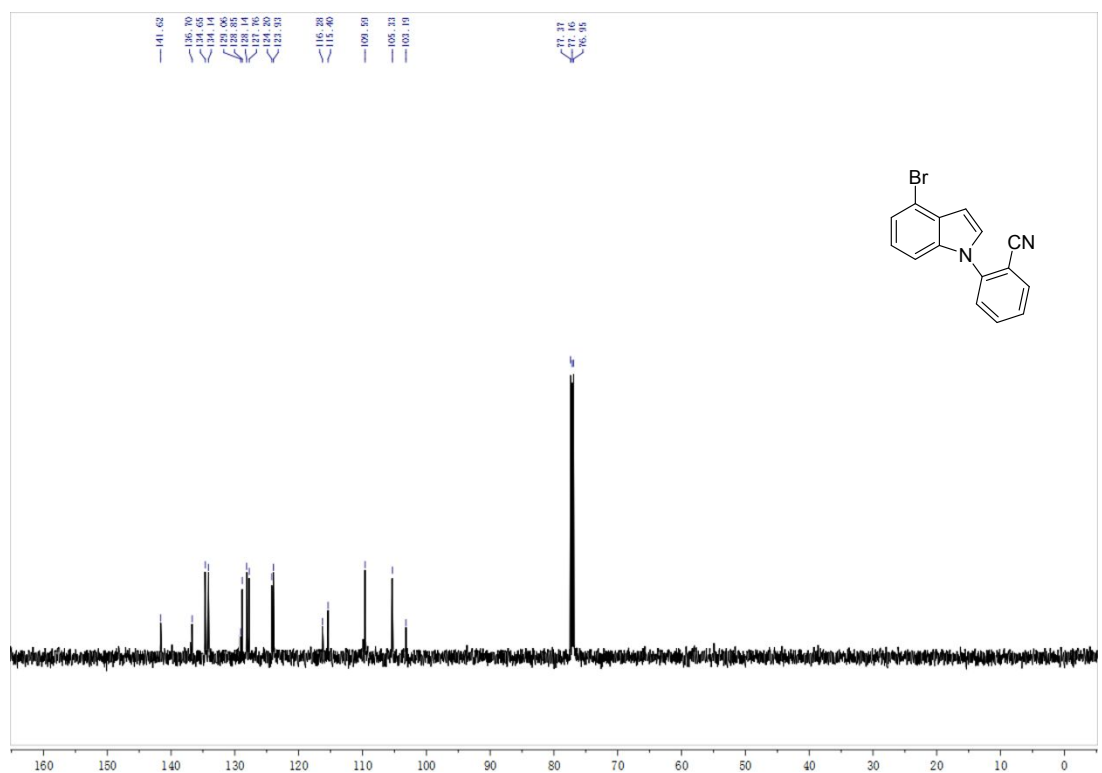

Figure S19. <sup>13</sup>C{<sup>1</sup>H} NMR for compound **1h**

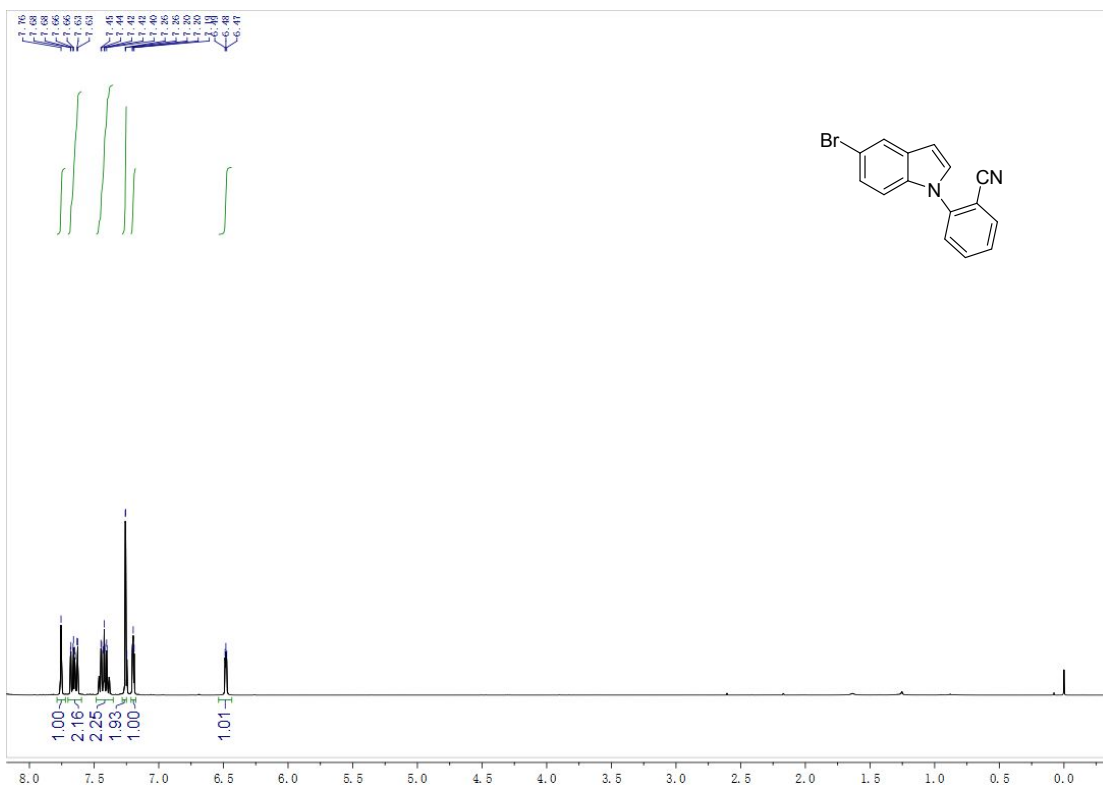

Figure S20. <sup>1</sup>H NMR for compound **1i**

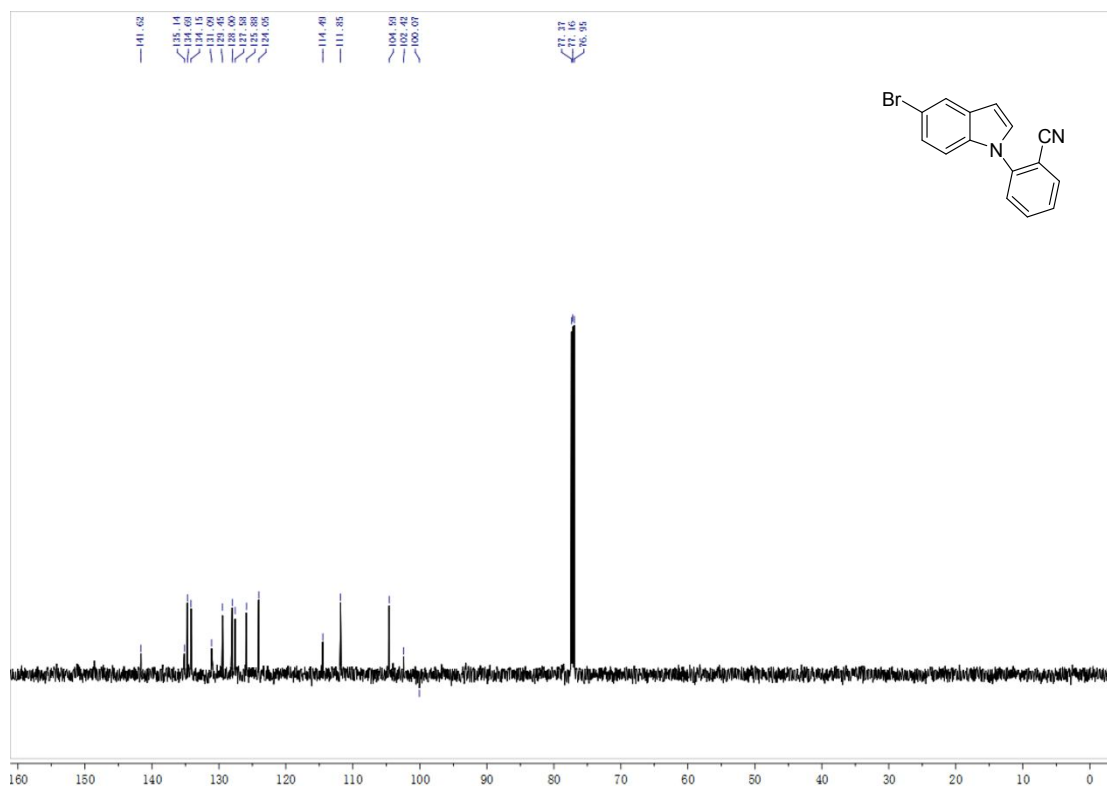

Figure S21. <sup>13</sup>C{<sup>1</sup>H} NMR for compound **1i**

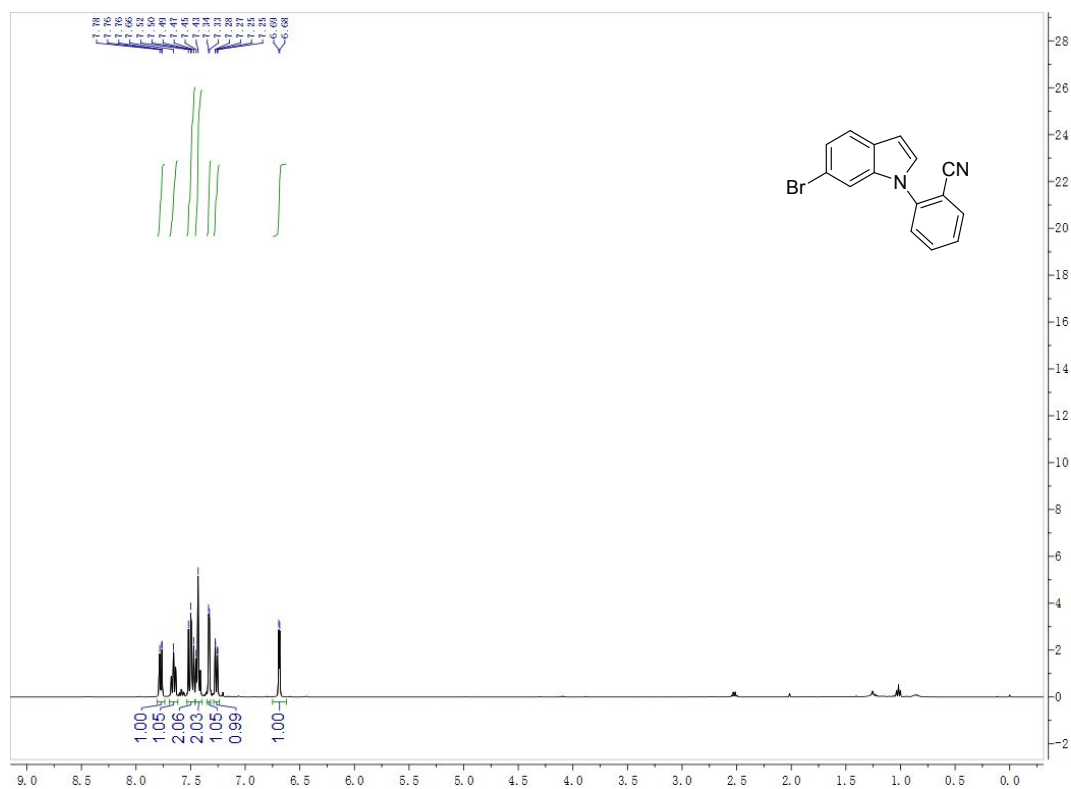

Figure S22. <sup>1</sup>H NMR for compound **1j**

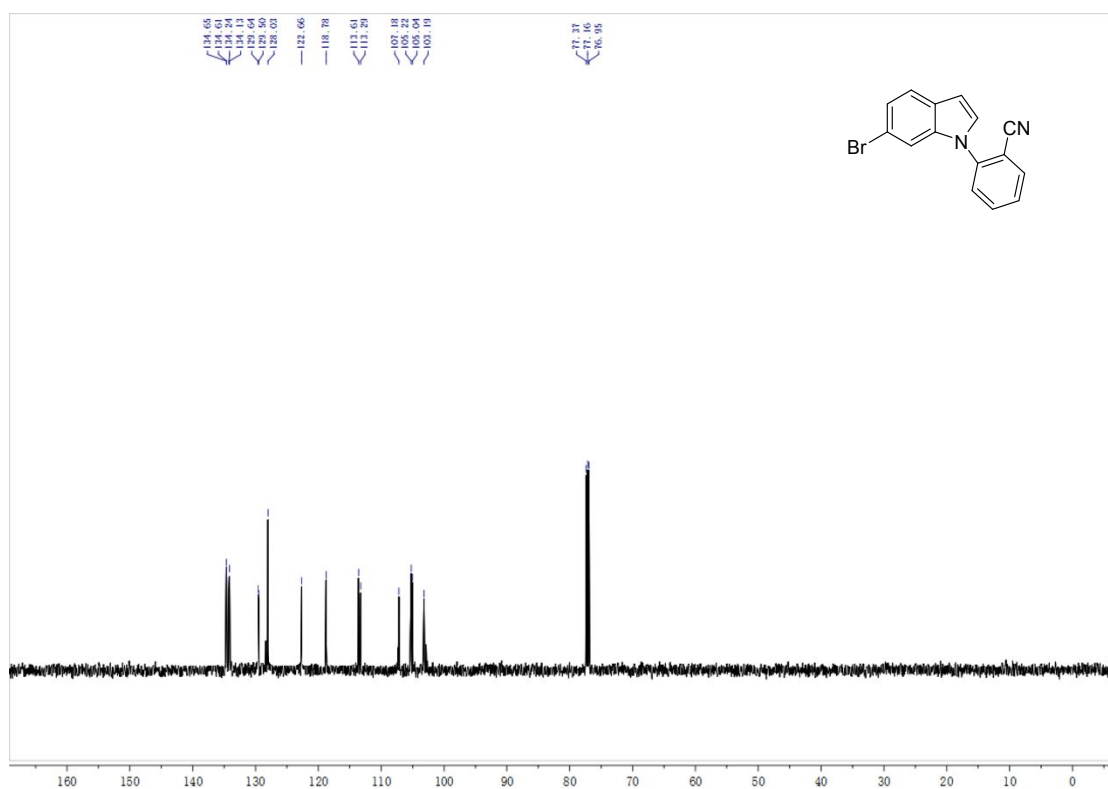

Figure S23. <sup>13</sup>C{<sup>1</sup>H} NMR for compound **1j**

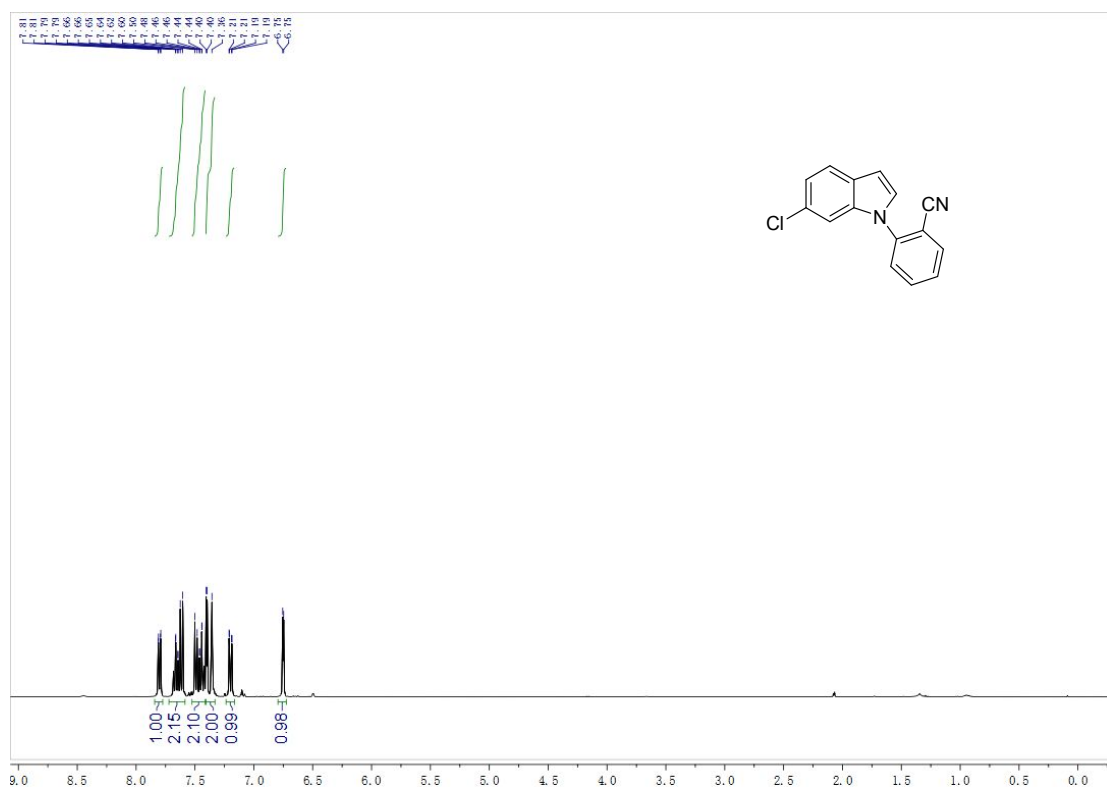

Figure S24.  $^1\text{H}$  NMR for compound **1k**

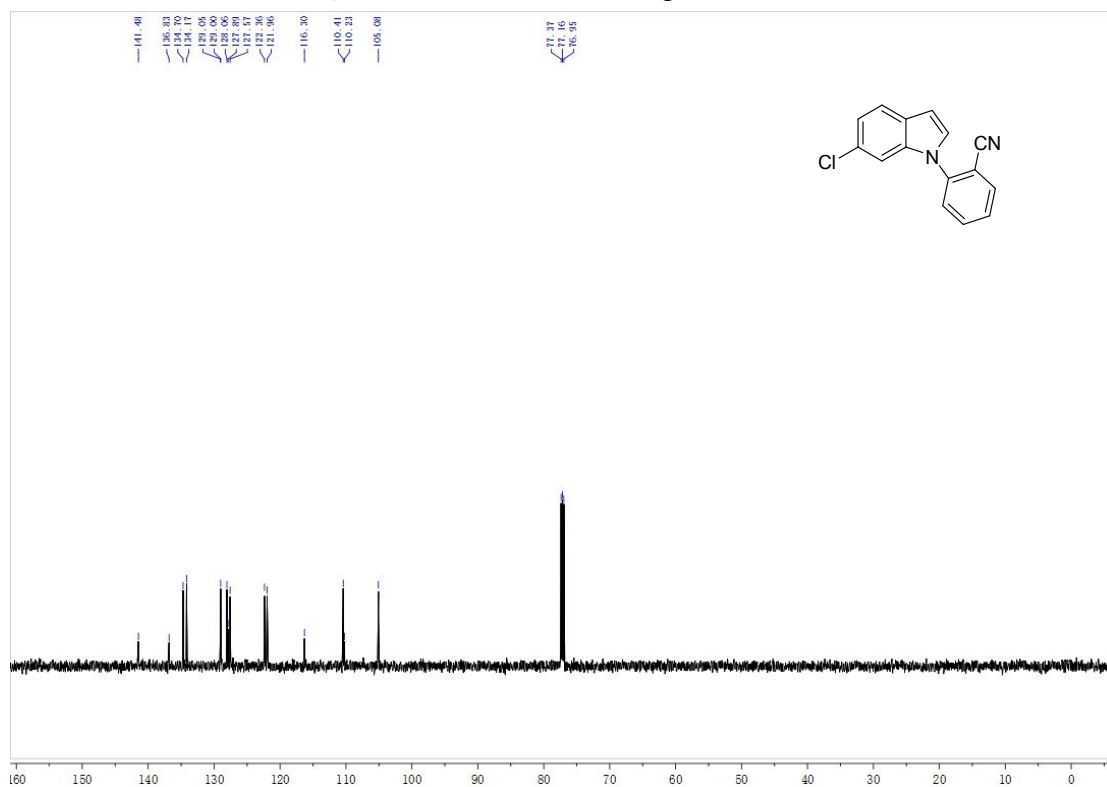

Figure S25.  $^{13}\text{C}\{^1\text{H}\}$  NMR for compound **1k**

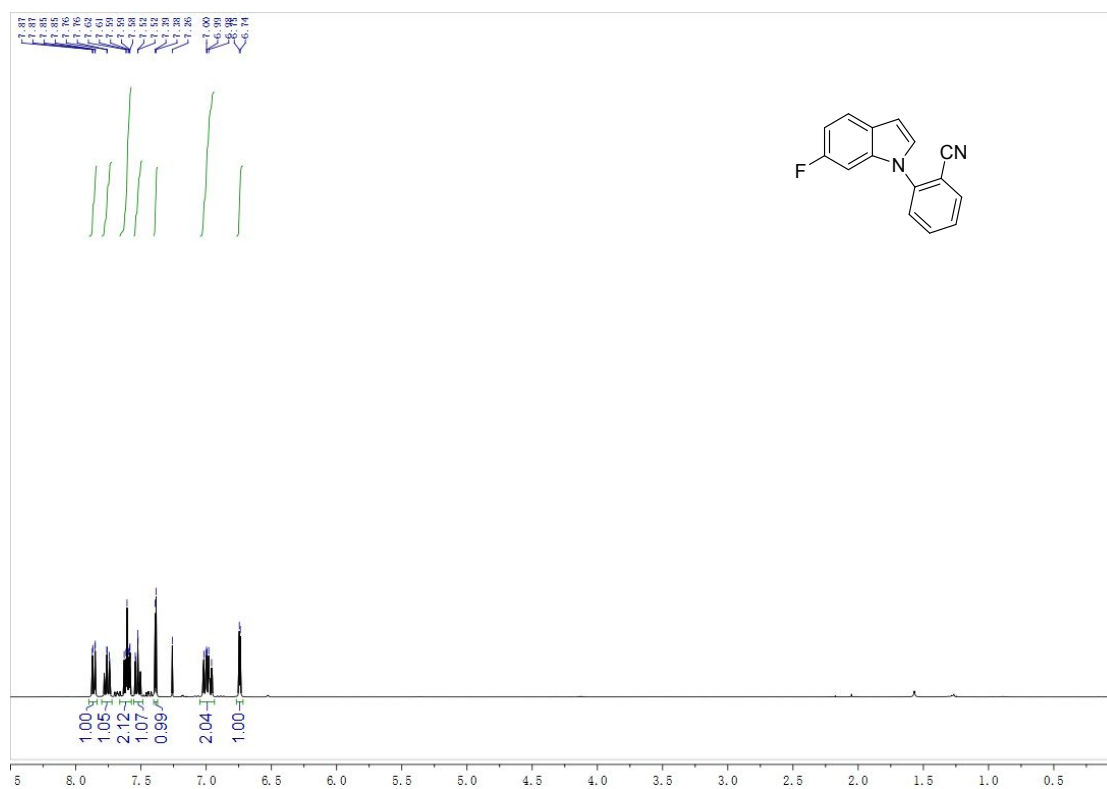

Figure S26. <sup>1</sup>H NMR for compound **11**

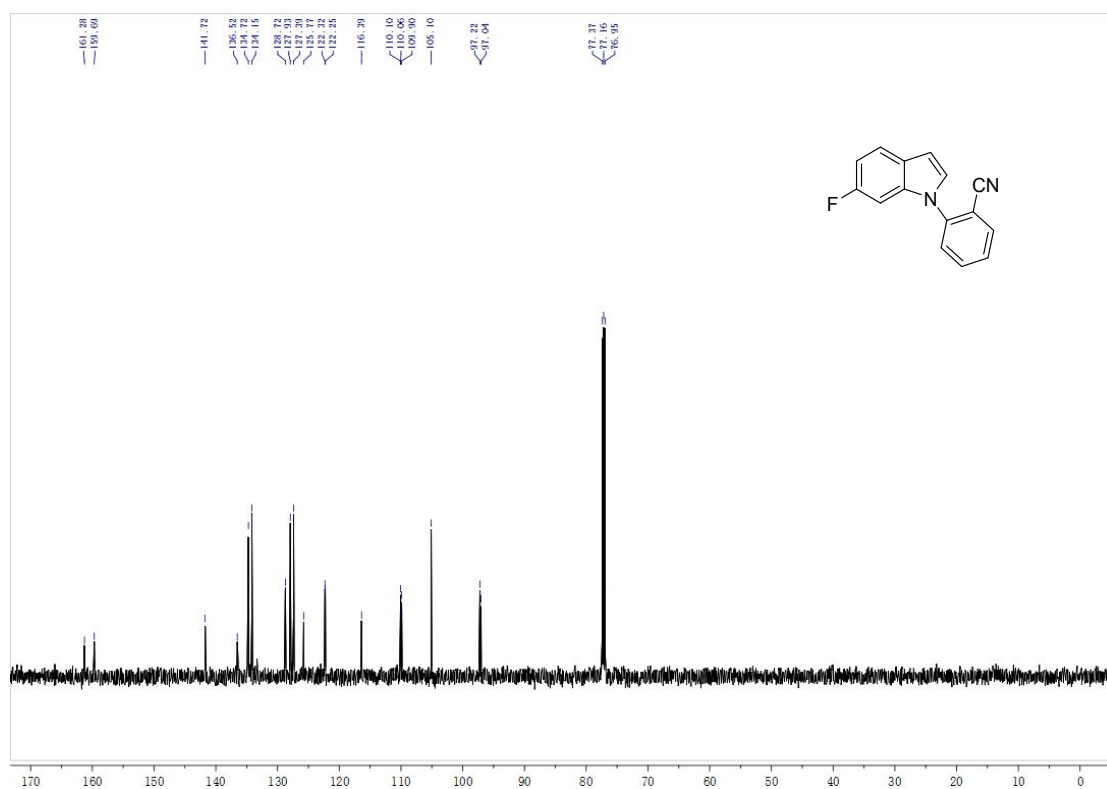

Figure S27. <sup>13</sup>C{<sup>1</sup>H} NMR for compound **11**



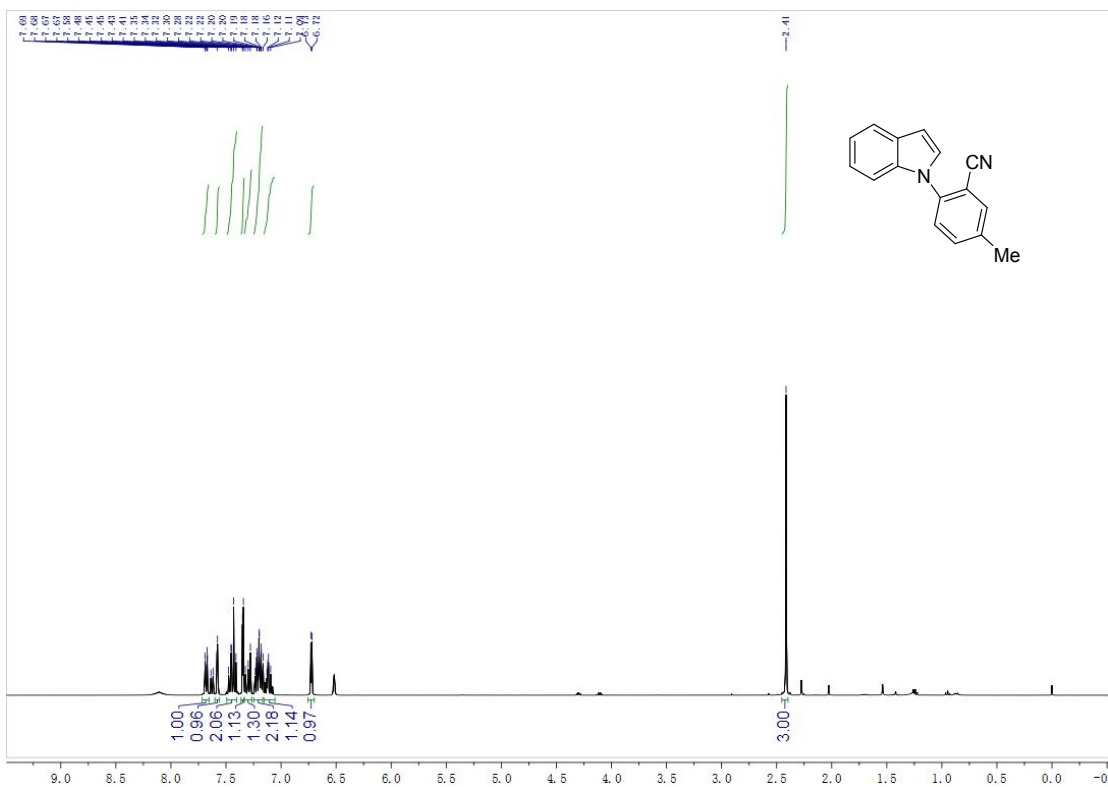

Figure S28.  $^1\text{H NMR}$  for compound **1m**

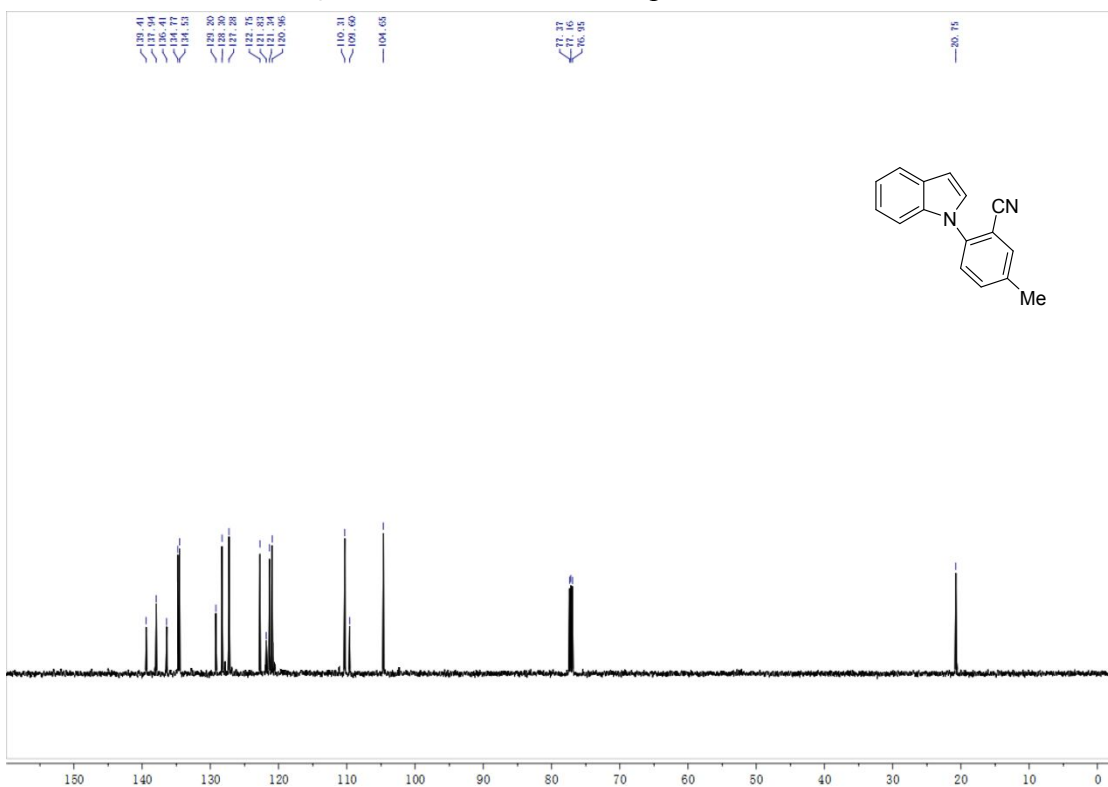

Figure S29.  $^{13}\text{C}\{^1\text{H}\}$  NMR for compound **1m**

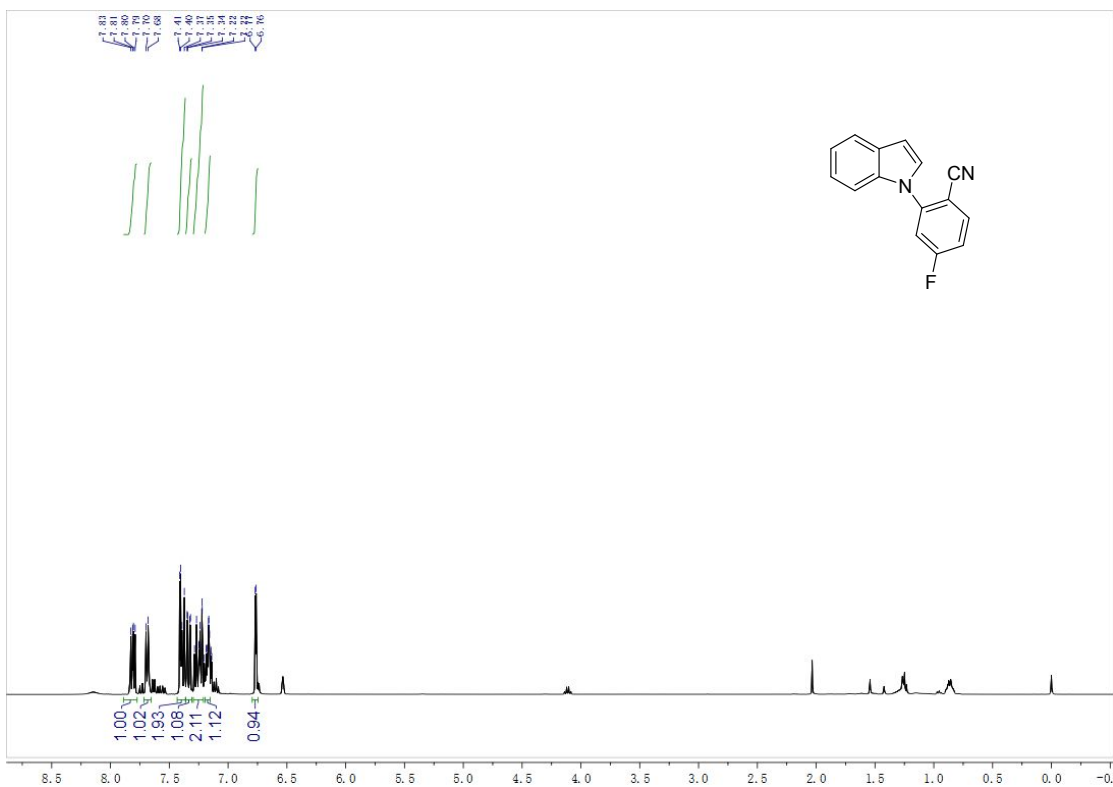

Figure S30.  $^1\text{H NMR}$  for compound **1n**

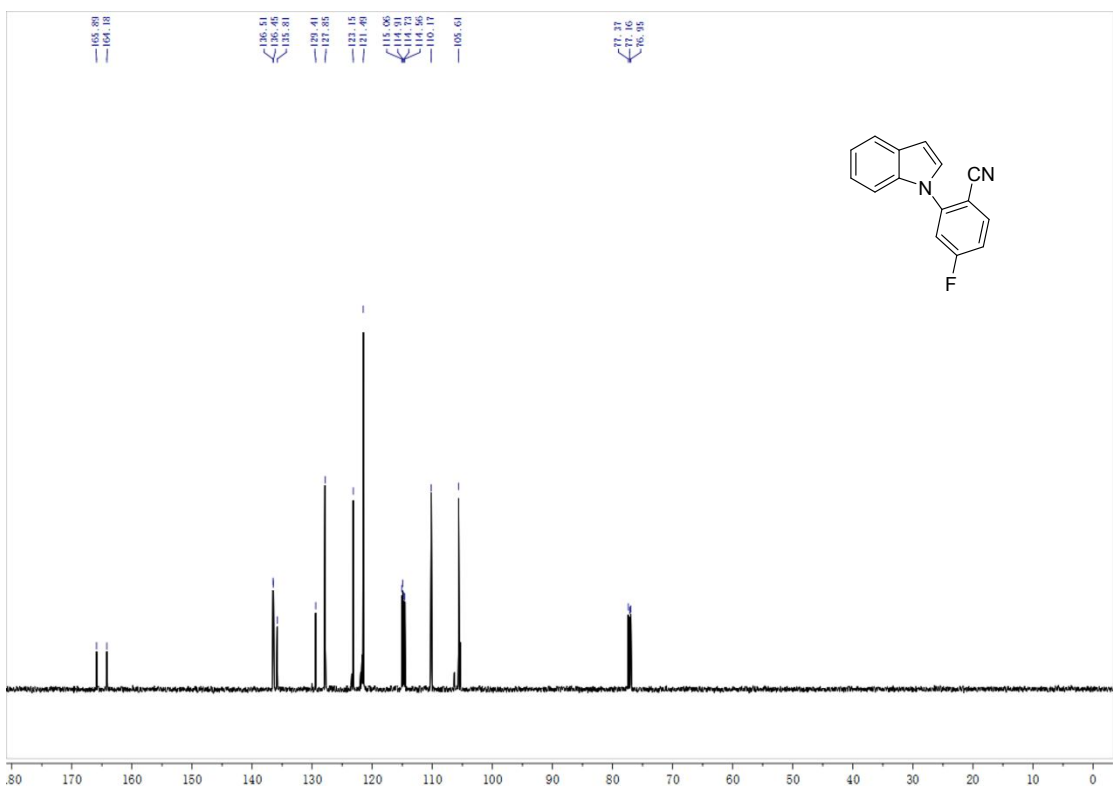

Figure S31.  $^{13}\text{C}\{^1\text{H}\}$  NMR for compound **1n**

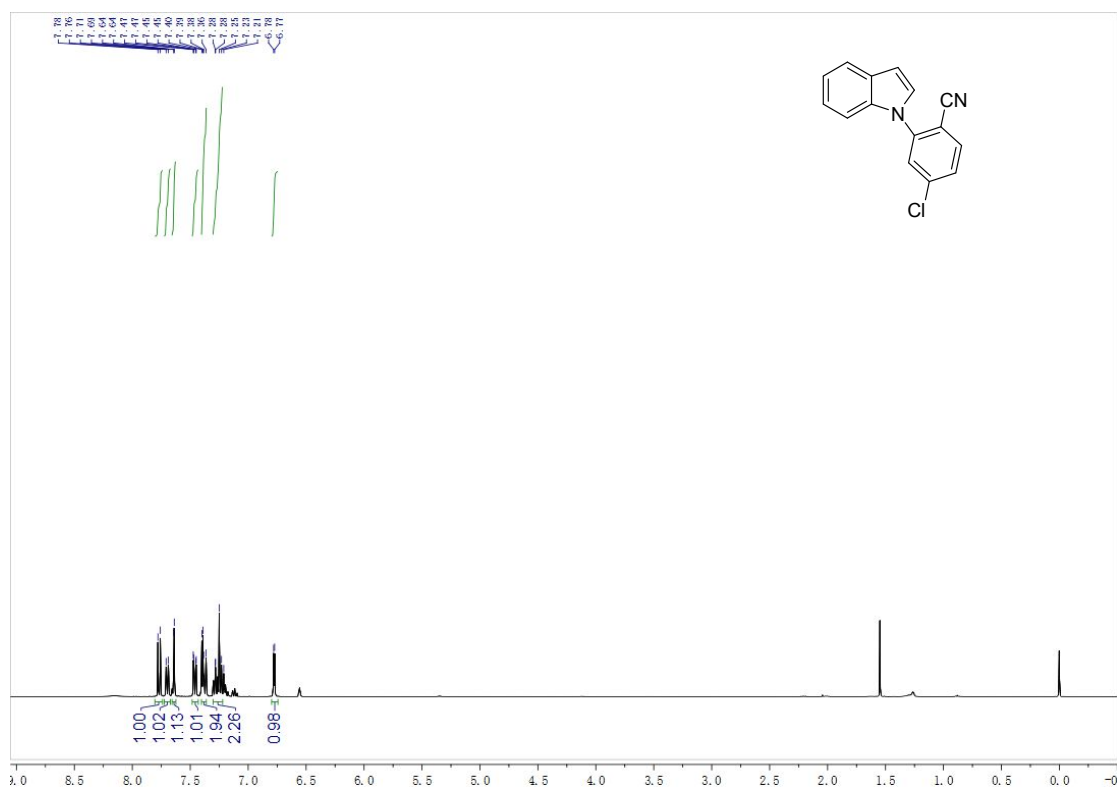

Figure S32.  $^1\text{H}$  NMR for compound **1o**

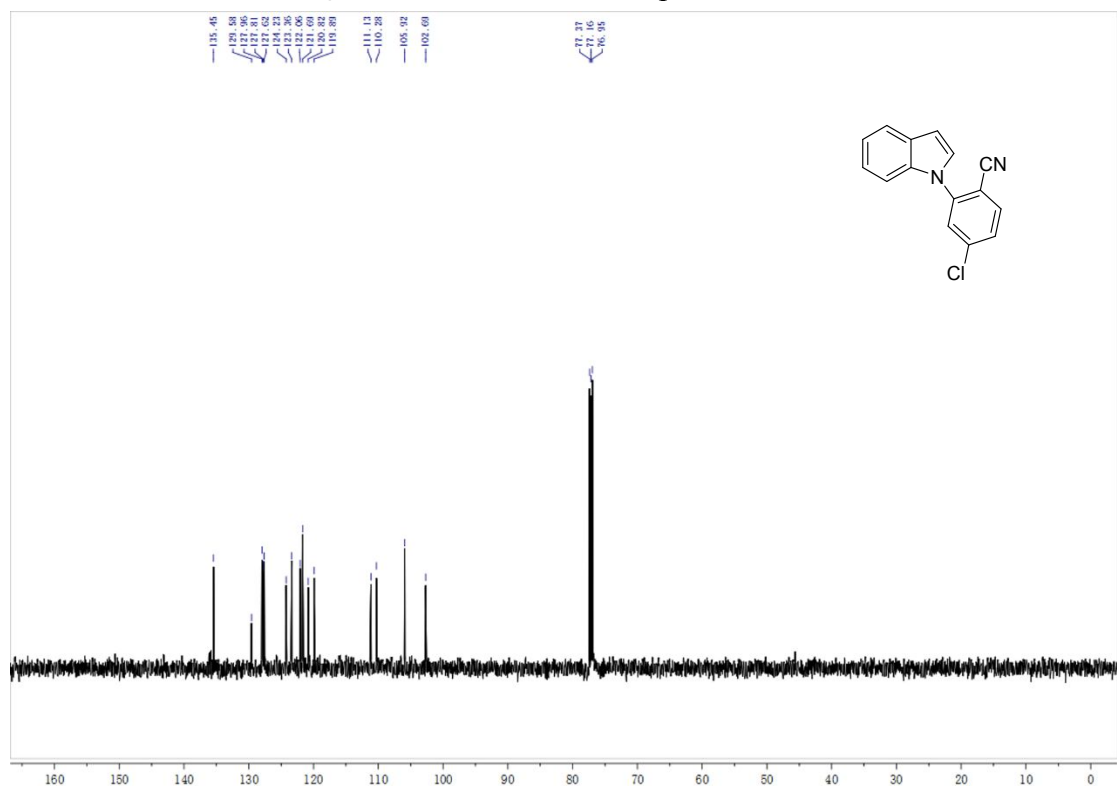

Figure S33.  $^{13}\text{C}\{^1\text{H}\}$  NMR for compound **1o**

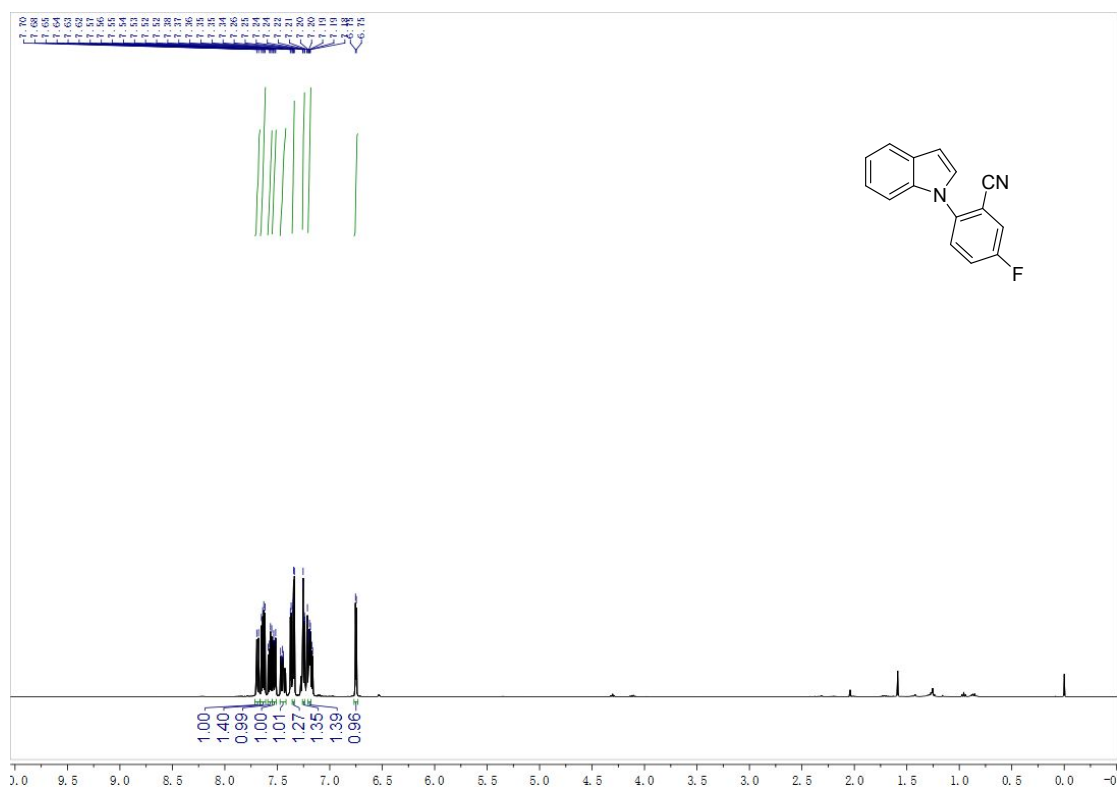

Figure S34.  $^1\text{H}$  NMR for compound **1p**

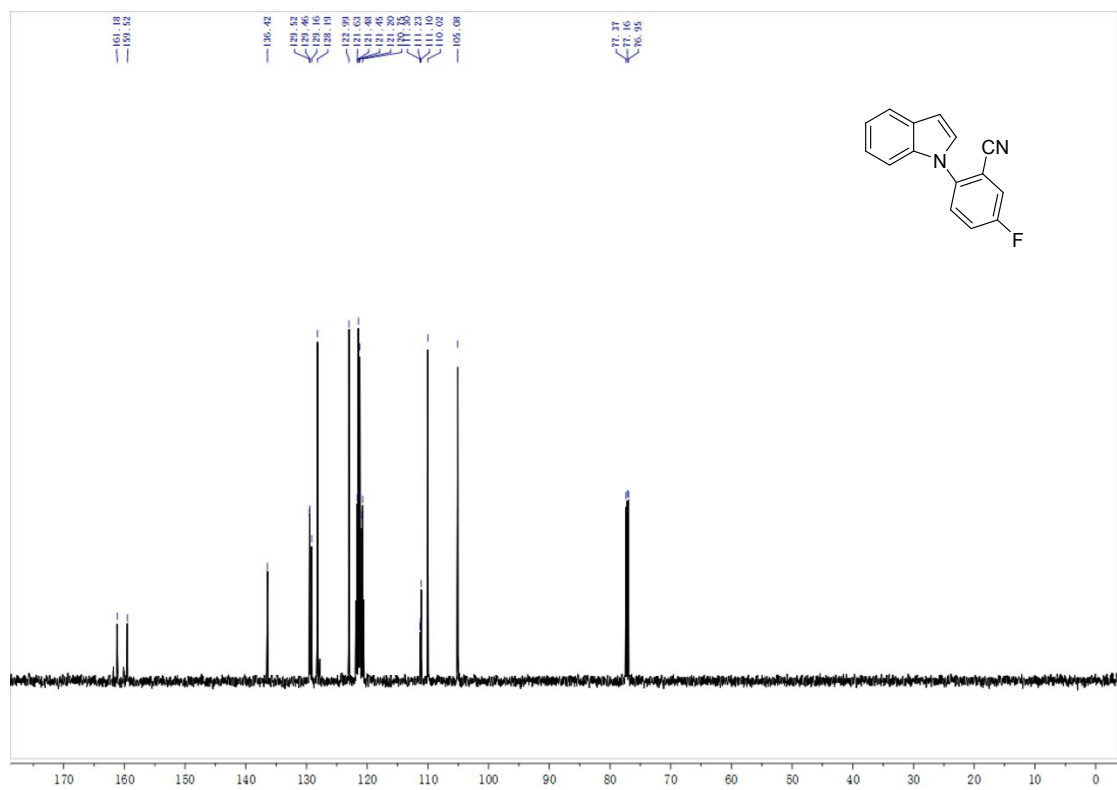

Figure S35.  $^{13}\text{C}\{^1\text{H}\}$  NMR for compound **1p**

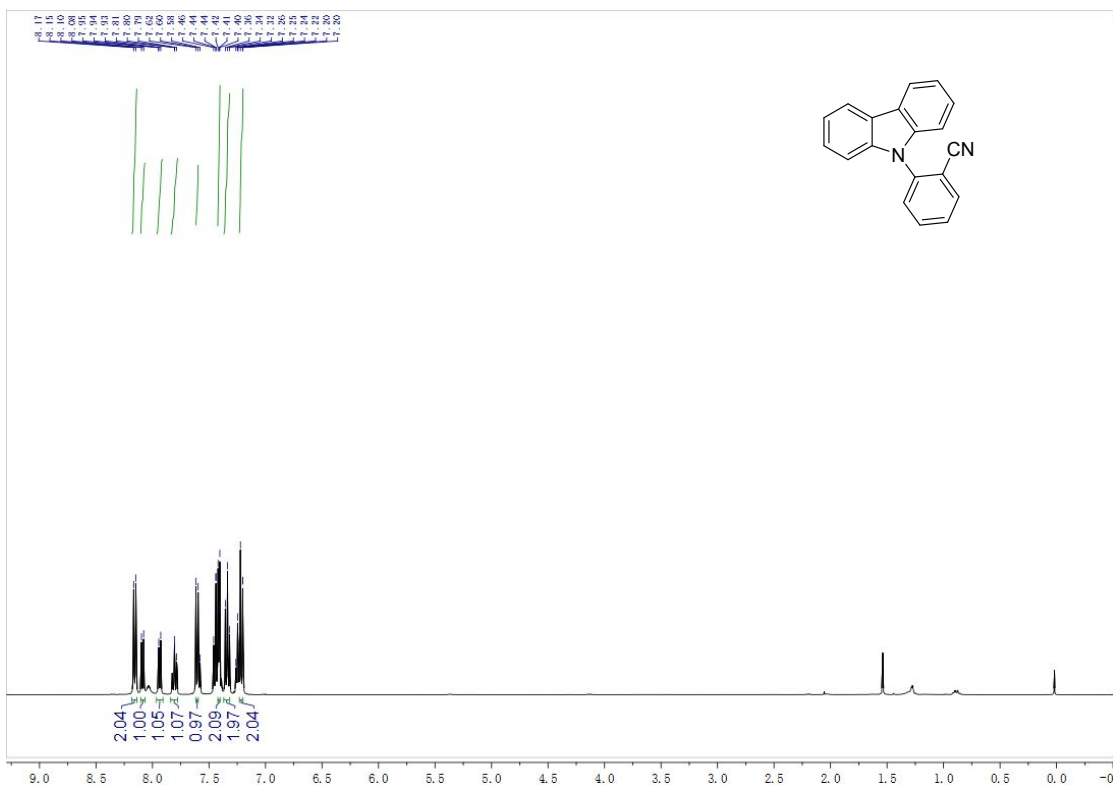

Figure S36.  $^1\text{H}$  NMR for compound **1q**

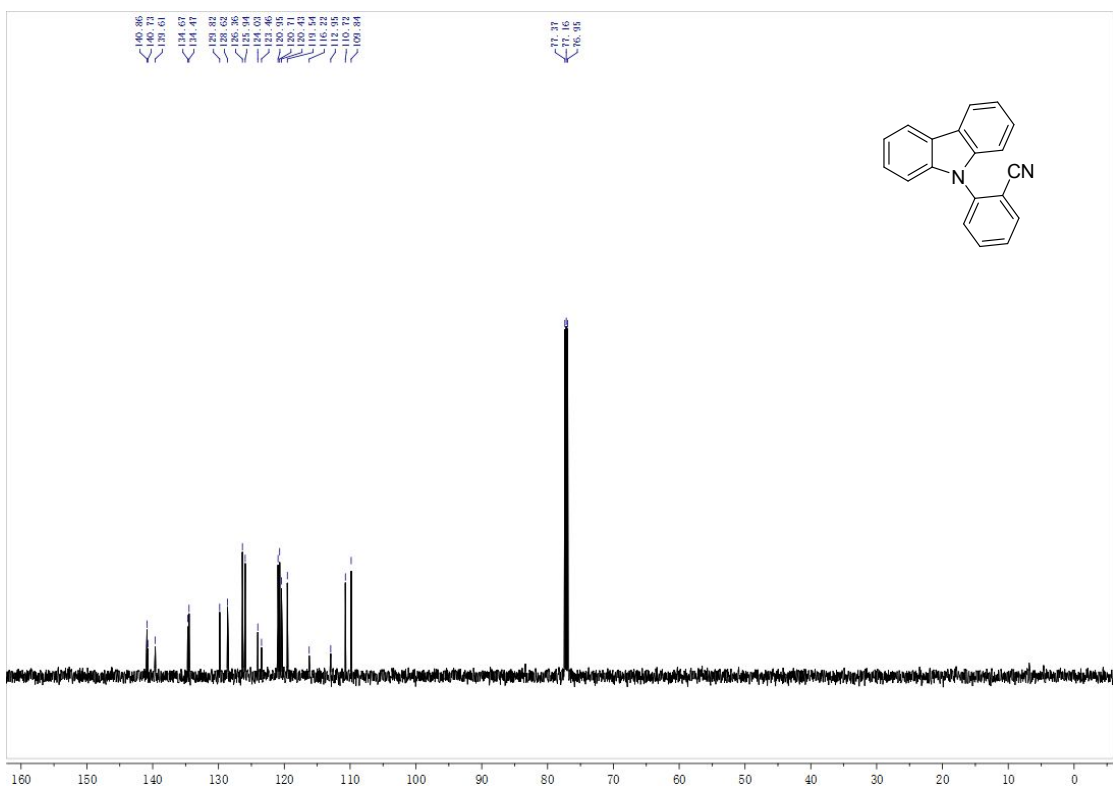

Figure S37.  $^{13}\text{C}\{^1\text{H}\}$  NMR for compound **1q**

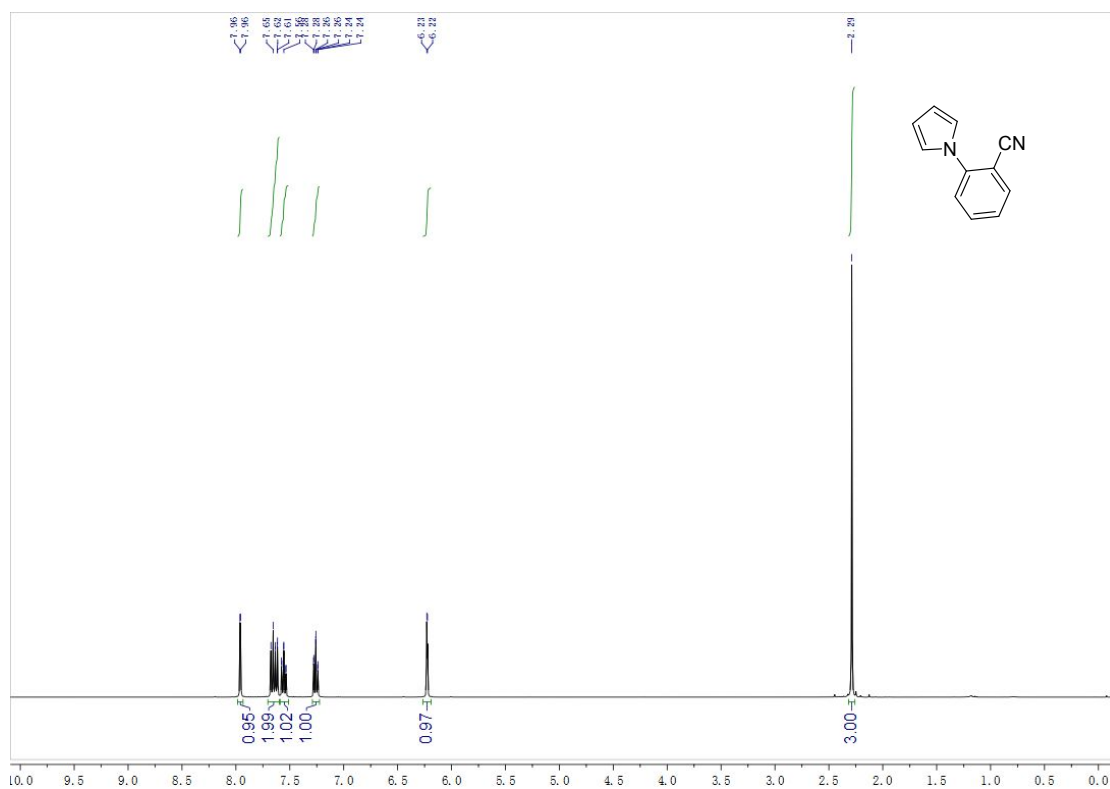

Figure S38.  $^1\text{H}$  NMR for compound **1r**

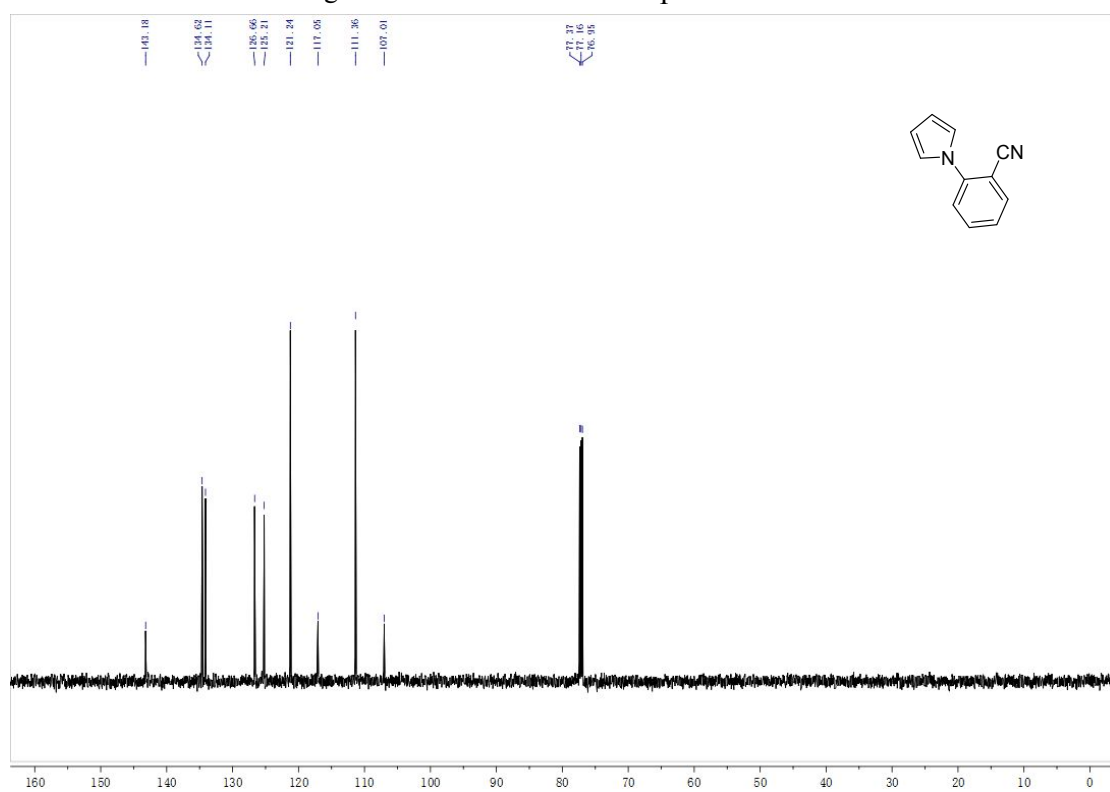

Figure S39.  $^{13}\text{C}\{^1\text{H}\}$  NMR for compound **1r**

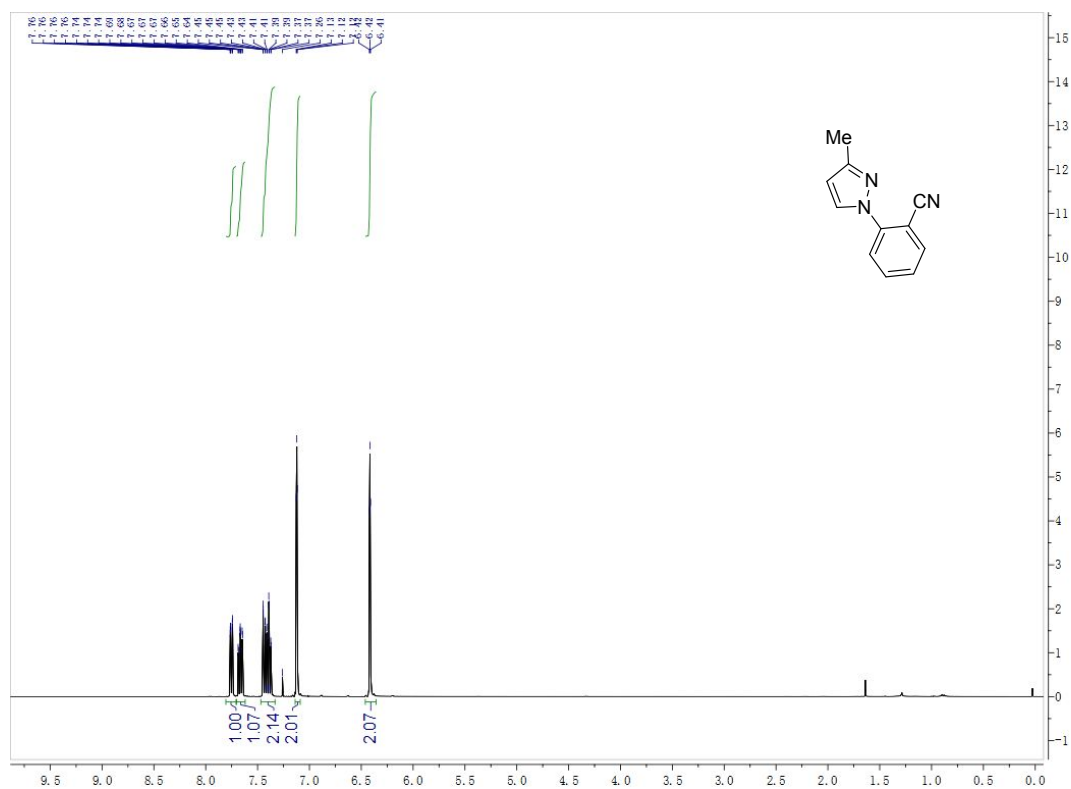

Figure S40. <sup>1</sup>H NMR for compound **1s**

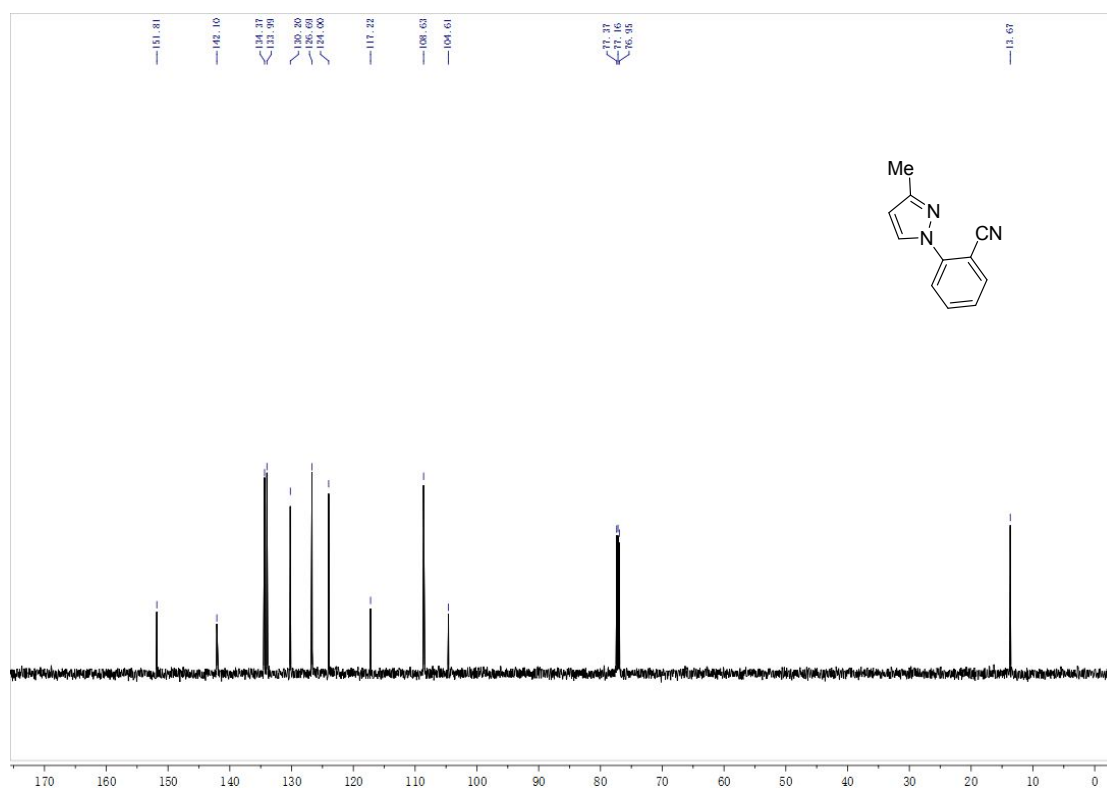

Figure S41. <sup>13</sup>C {<sup>1</sup>H} NMR for compound **1s**

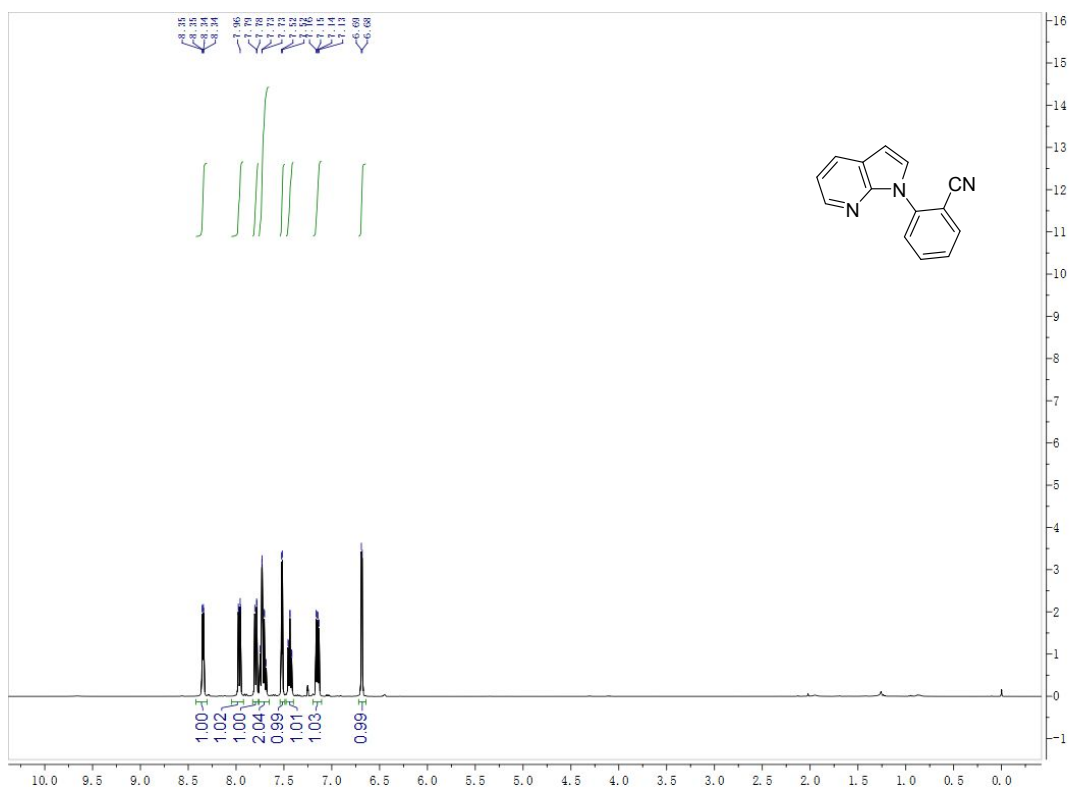

Figure S42.  $^1\text{H}$  NMR for compound **1t**

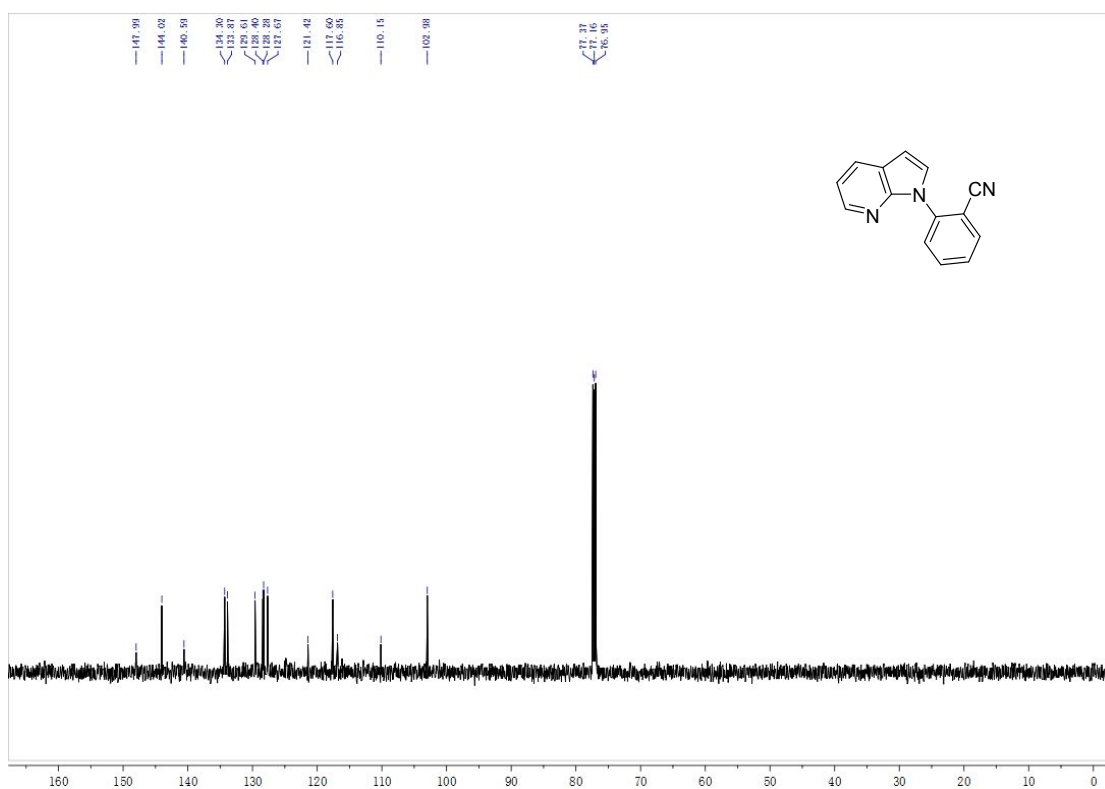

Figure S43.  $^{13}\text{C}\{^1\text{H}\}$  NMR for compound **1t**



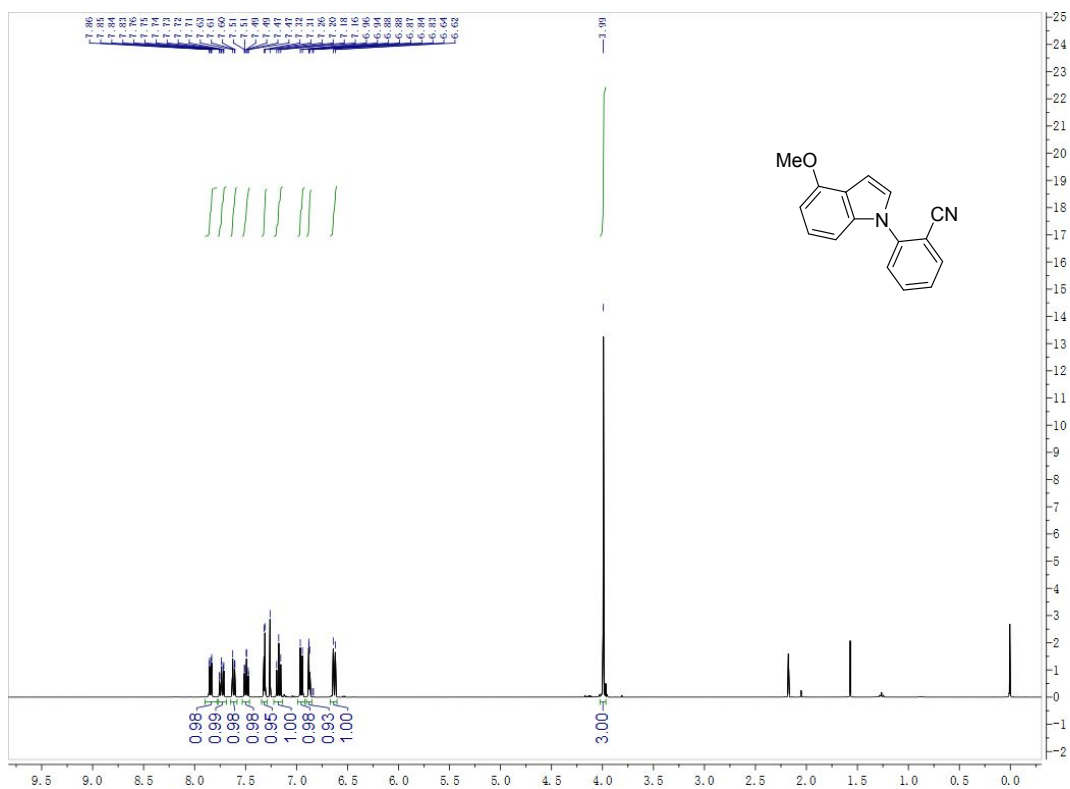

Figure S44.  $^1\text{H}$  NMR for compound **1u**

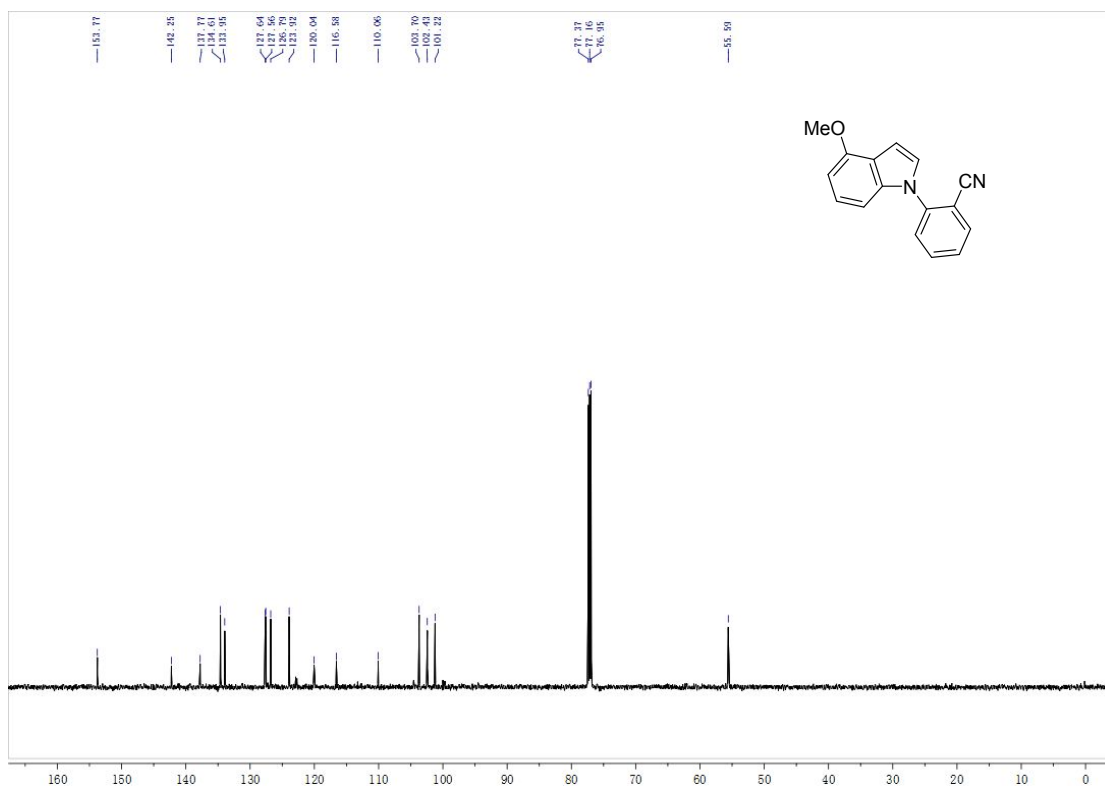

Figure S45.  $^{13}\text{C}\{^1\text{H}\}$  NMR for compound **1u**

3-2. Copies of  $^1\text{H}$ ,  $^{13}\text{C}\{^1\text{H}\}$ , and  $^{19}\text{F}$  NMR Spectra for products

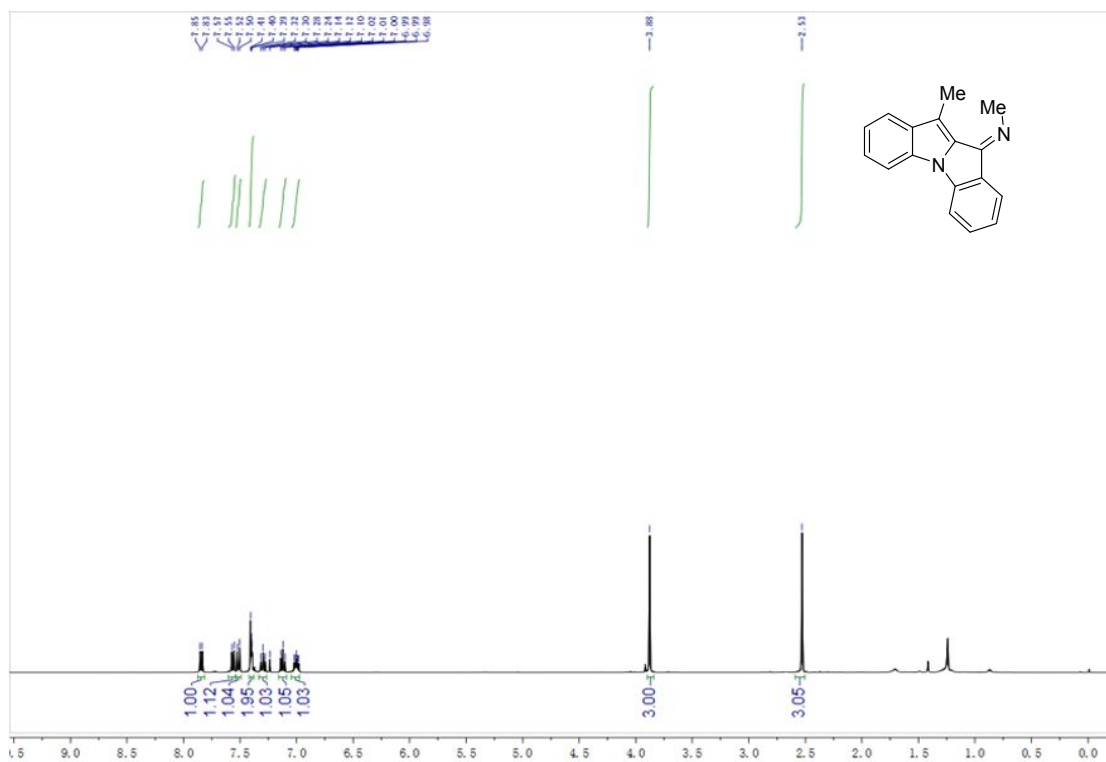

Figure S46.  $^1\text{H}$  NMR for compound **3a**

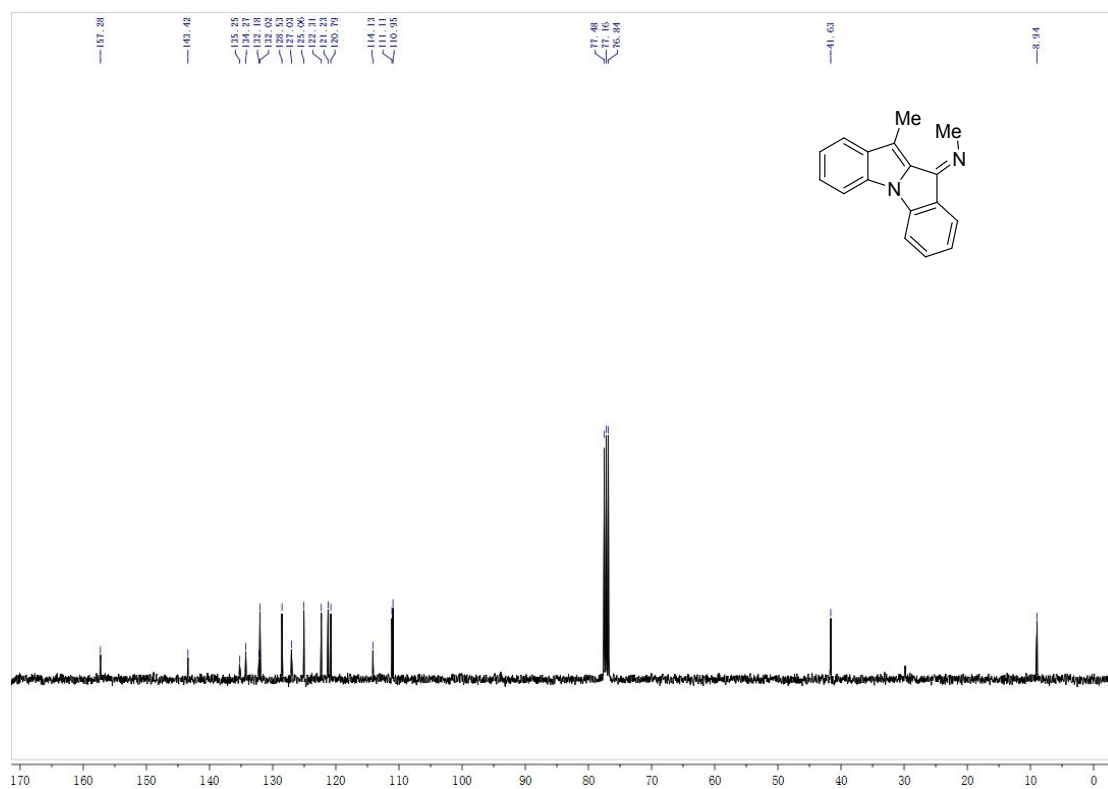

Figure S47.  $^{13}\text{C}\{^1\text{H}\}$  NMR for compound **3a**

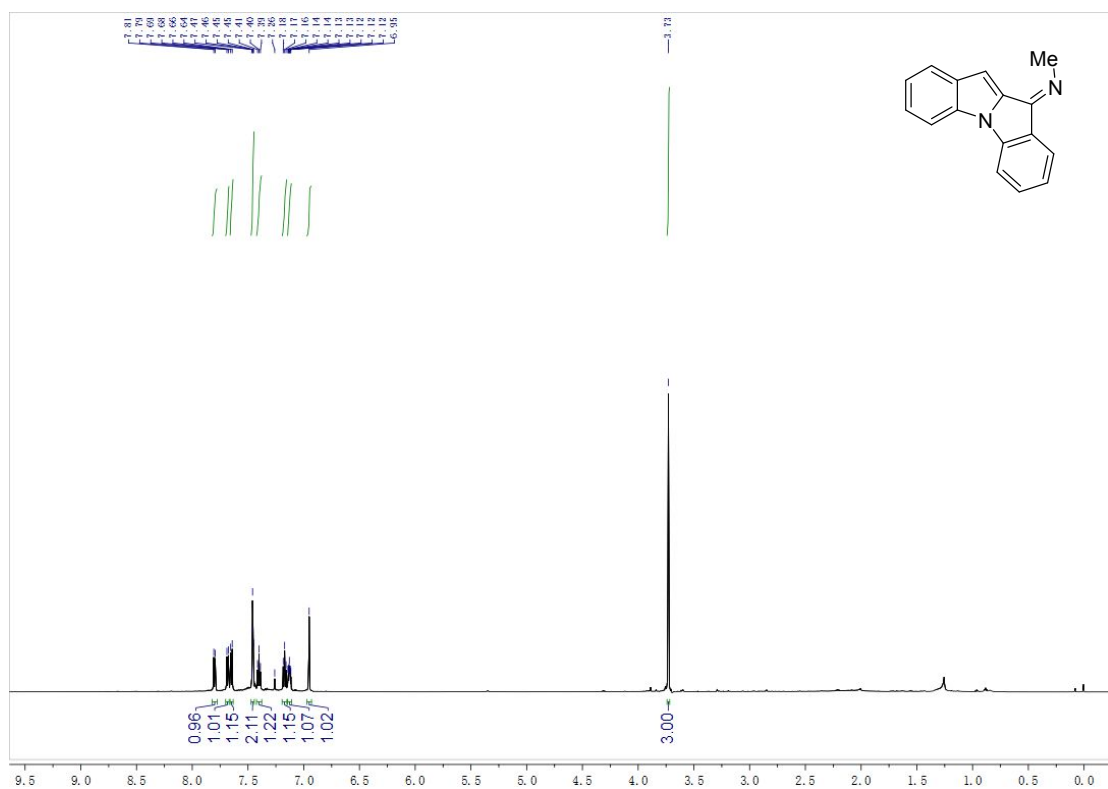

Figure S48.  $^1\text{H NMR}$  for compound **3b**

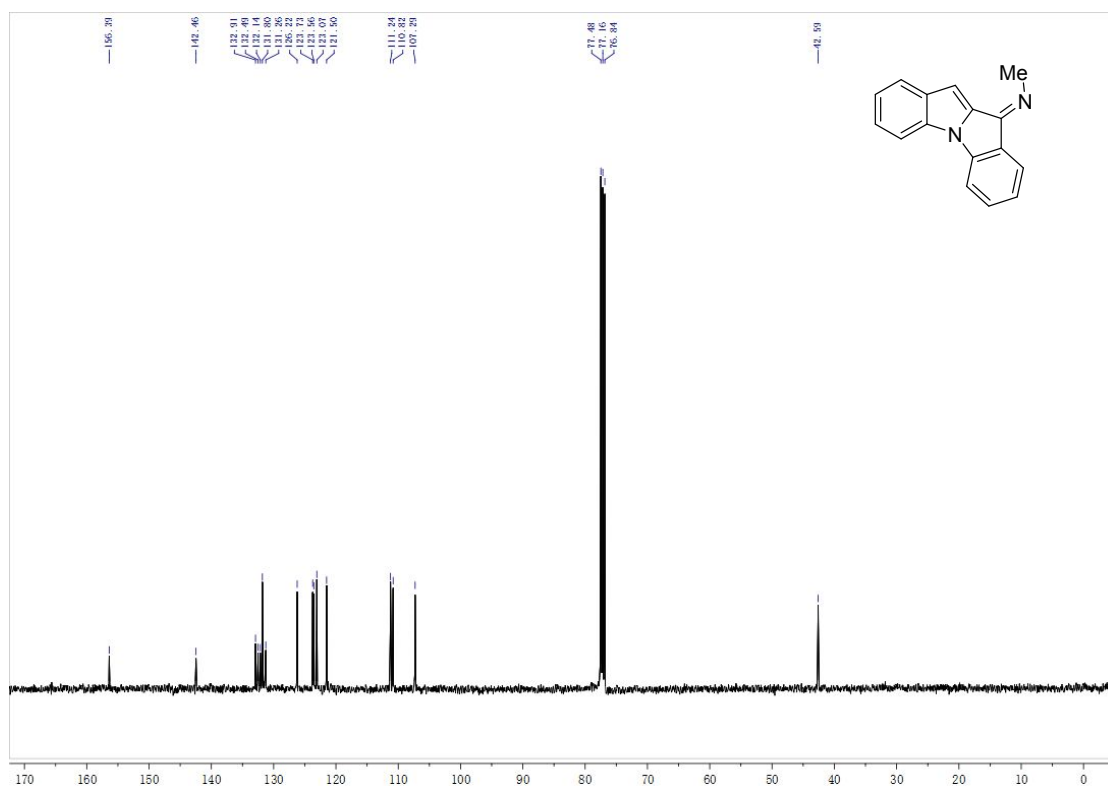

Figure S49.  $^{13}\text{C}\{^1\text{H}\}$  NMR for compound **3b**

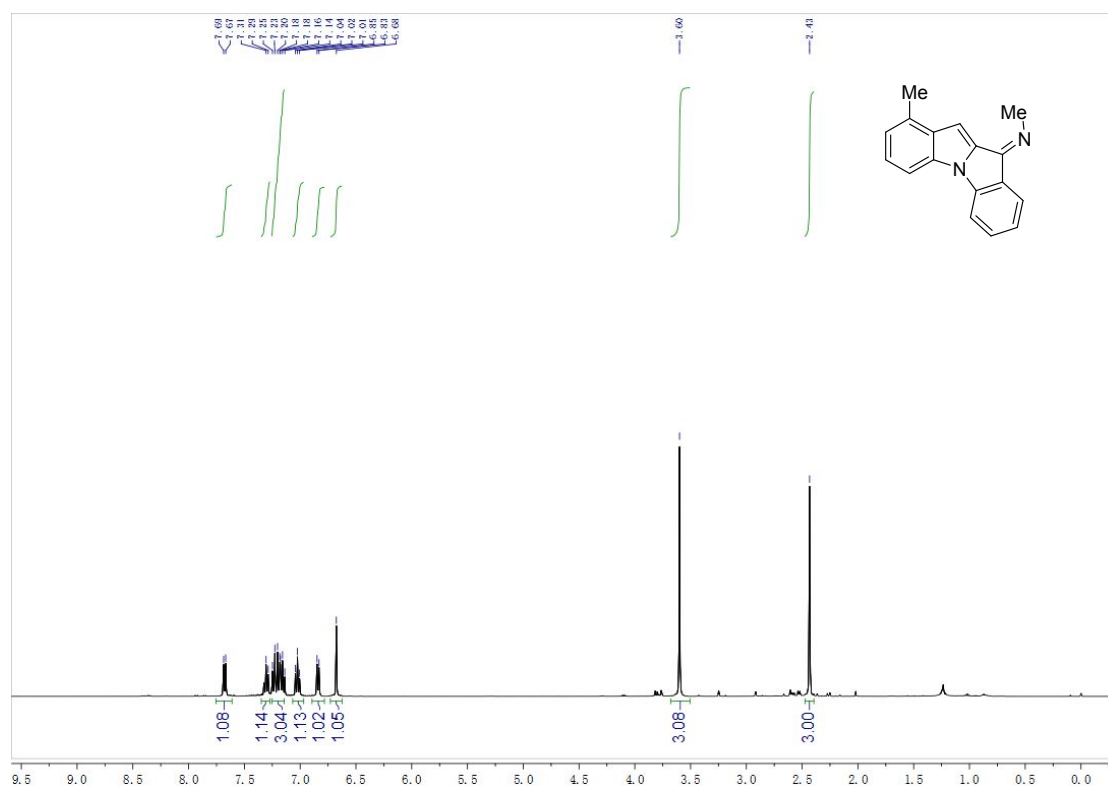

Figure S50.  $^1\text{H}$  NMR for compound **3c**

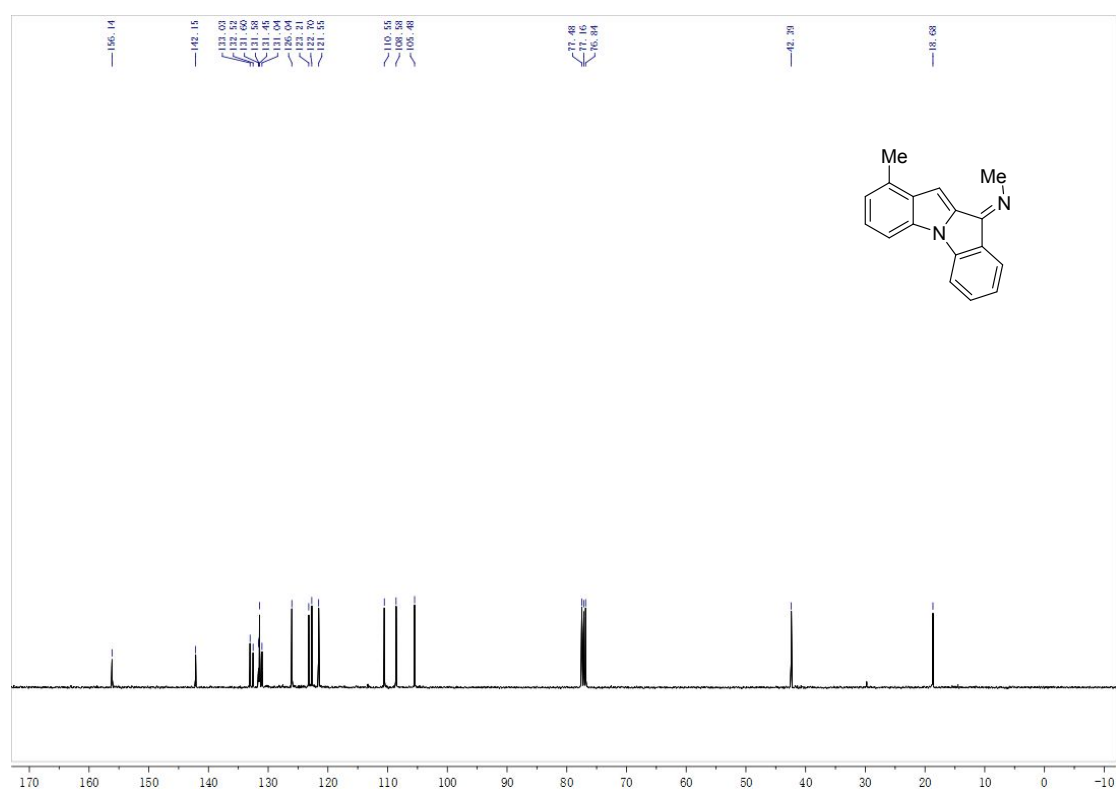

Figure S51.  $^{13}\text{C}\{^1\text{H}\}$  NMR for compound **3c**

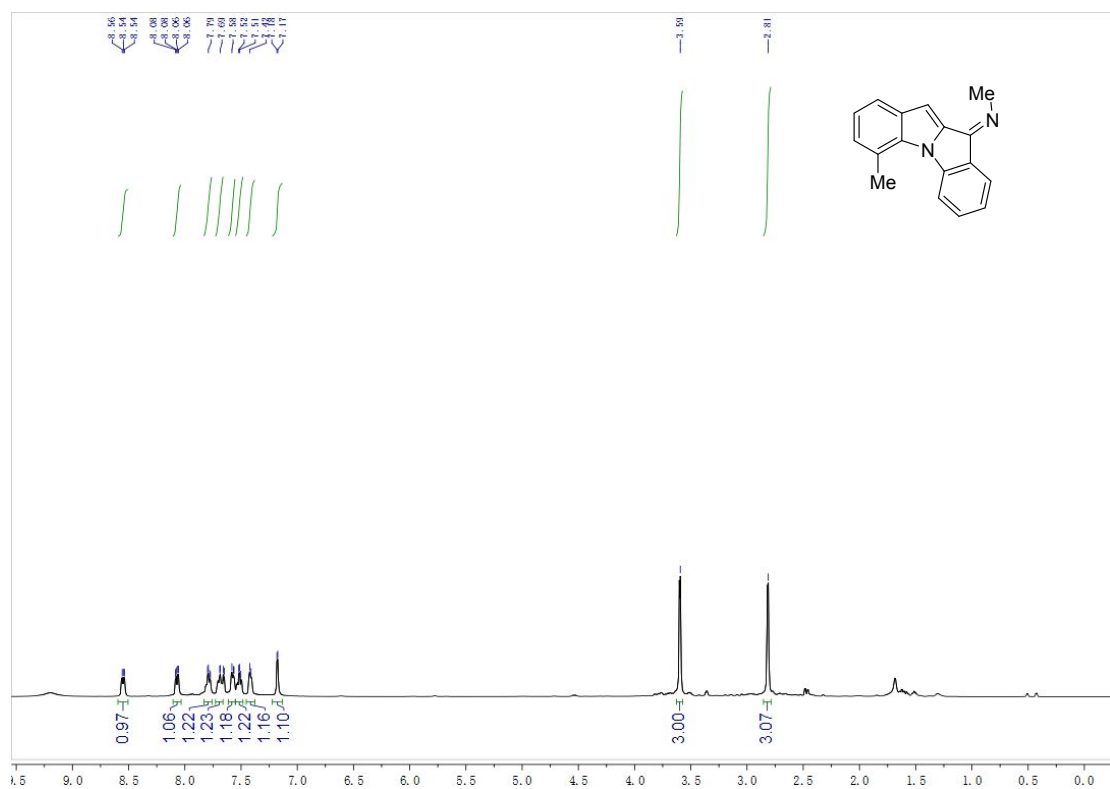

Figure S52.  $^1\text{H}$  NMR for compound **3d**

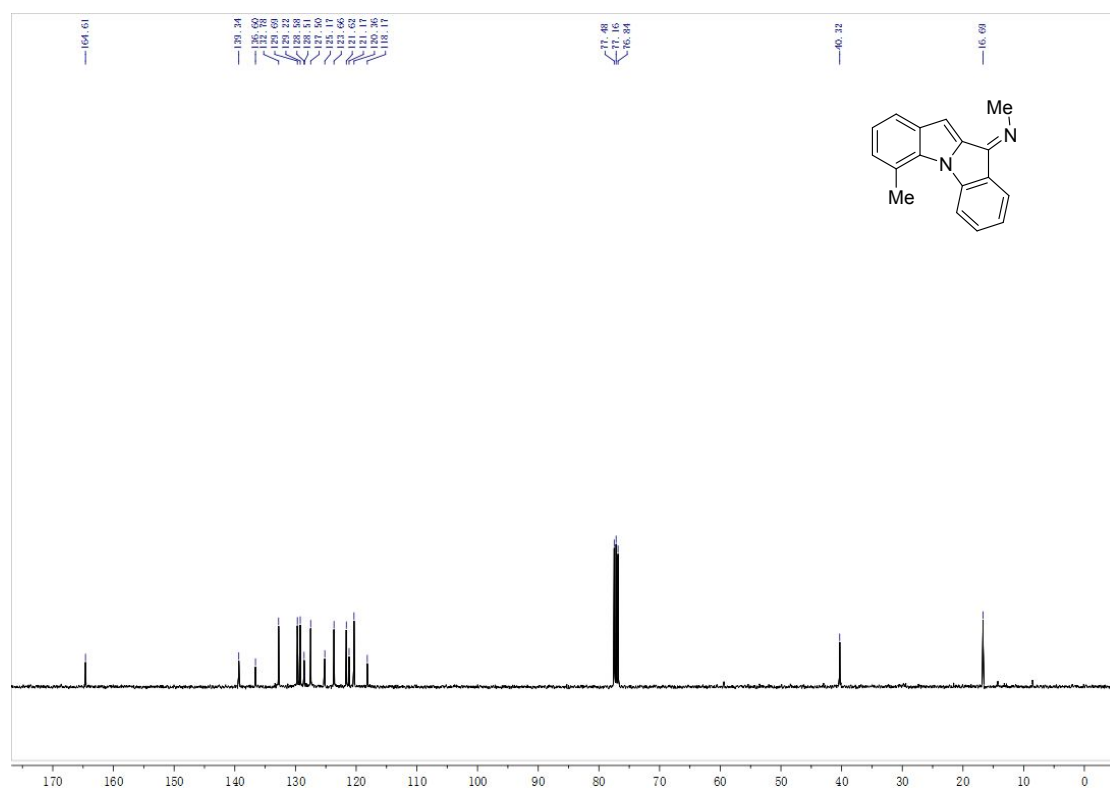

Figure S53.  $^{13}\text{C}\{^1\text{H}\}$  NMR for compound **3d**

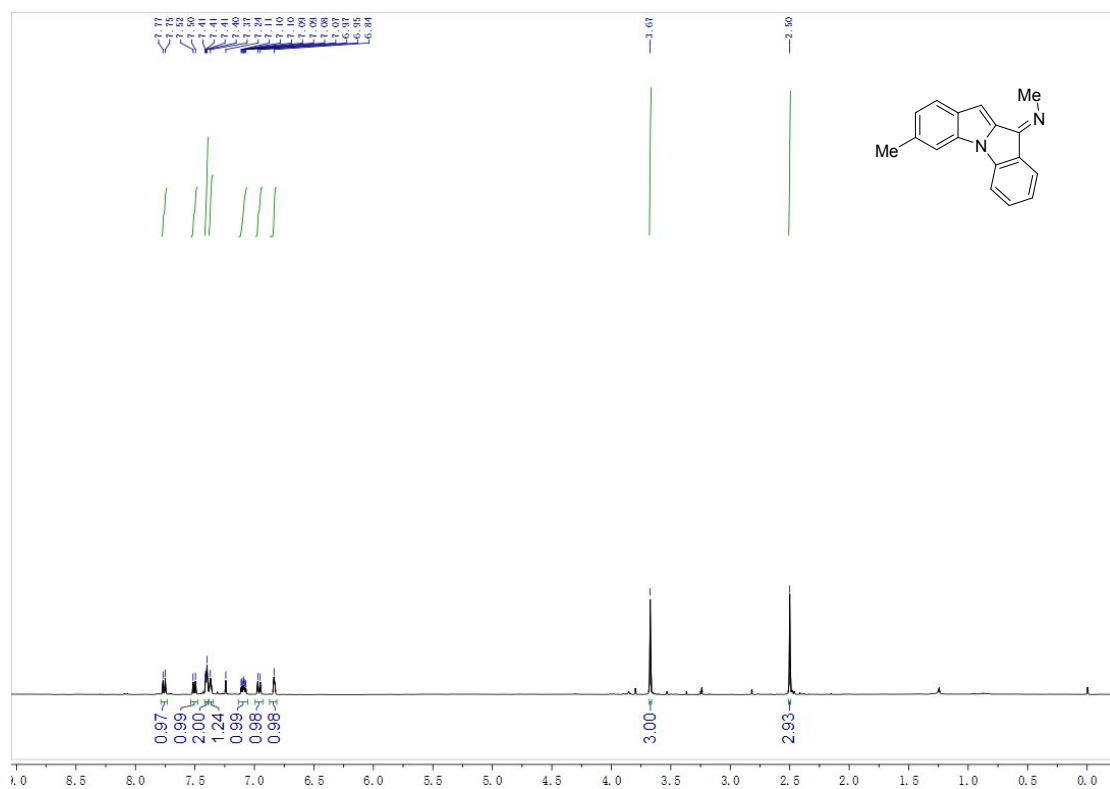

Figure S54. <sup>1</sup>H NMR for compound **3e**

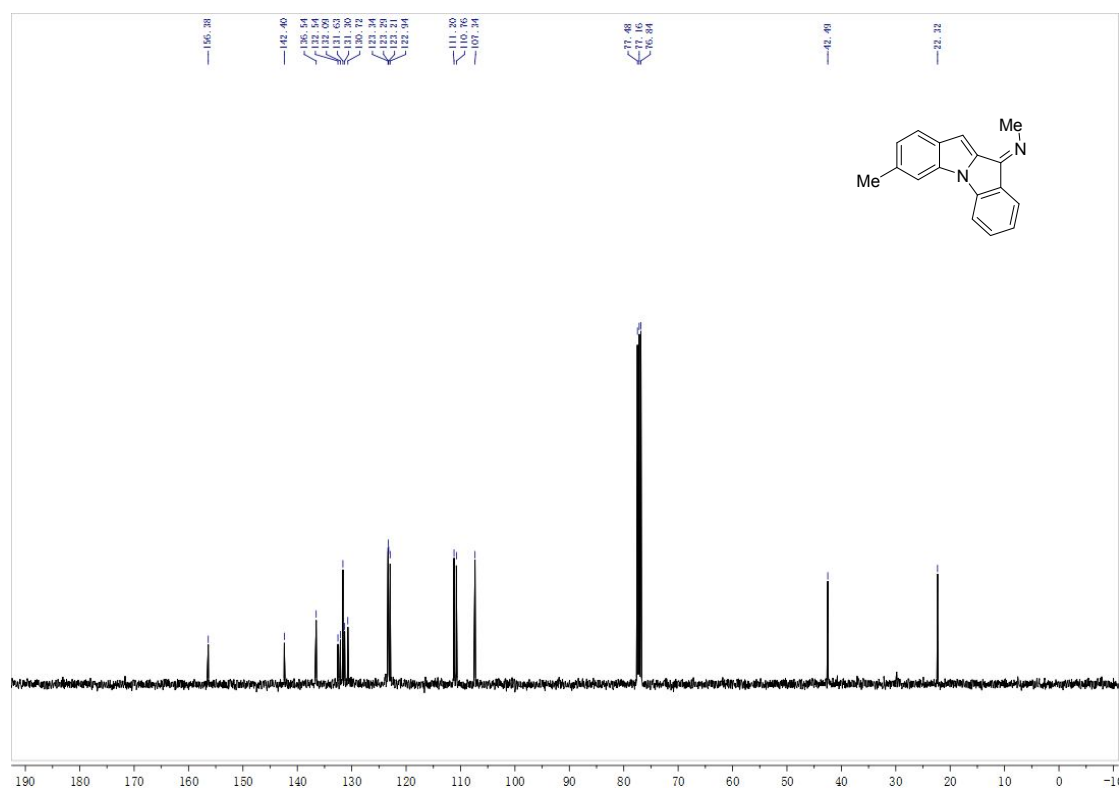

Figure S55. <sup>13</sup>C{<sup>1</sup>H} NMR for compound **3e**

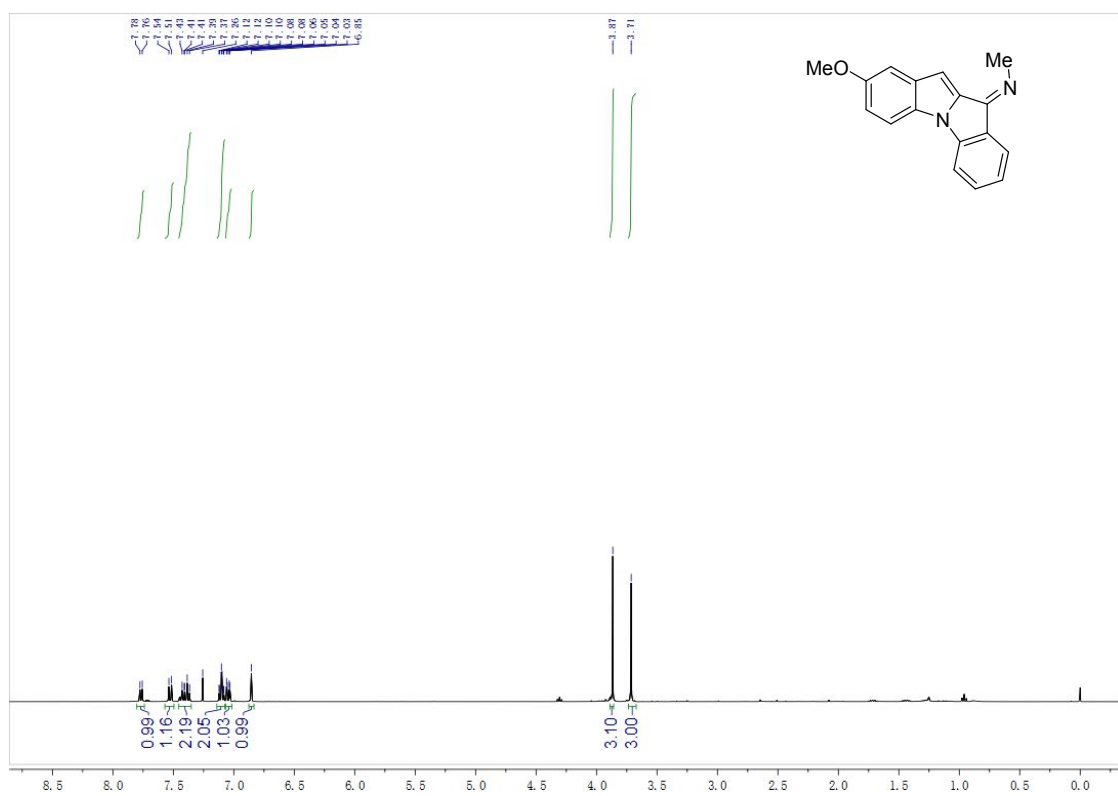

Figure S56.  $^1\text{H}$  NMR for compound **3f**

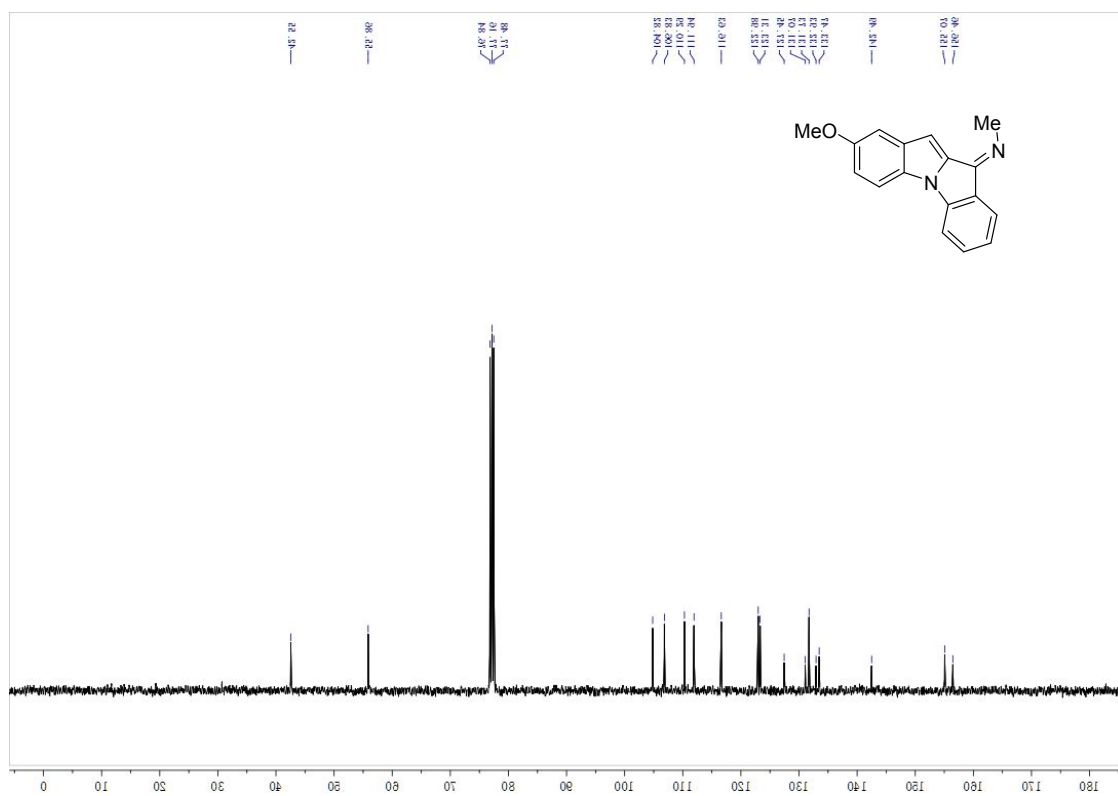

Figure S57.  $^{13}\text{C}\{^1\text{H}\}$  NMR for compound **3f**

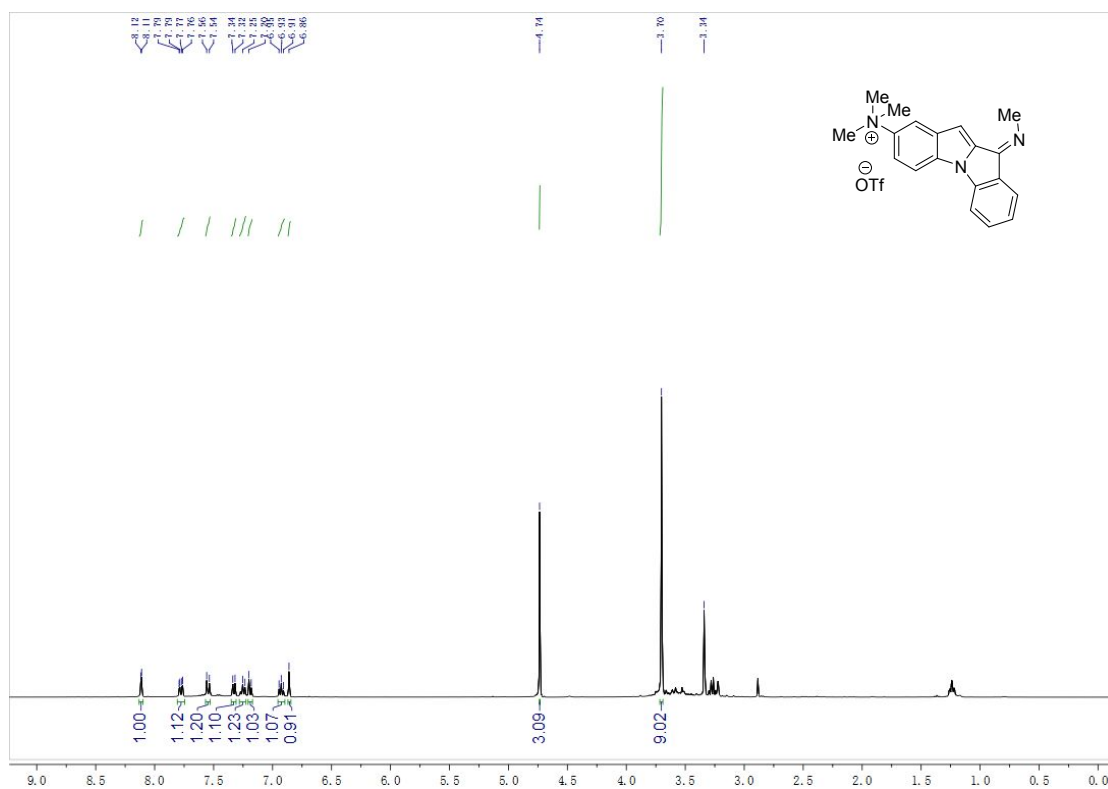

Figure S58. <sup>1</sup>H NMR for compound **3g**

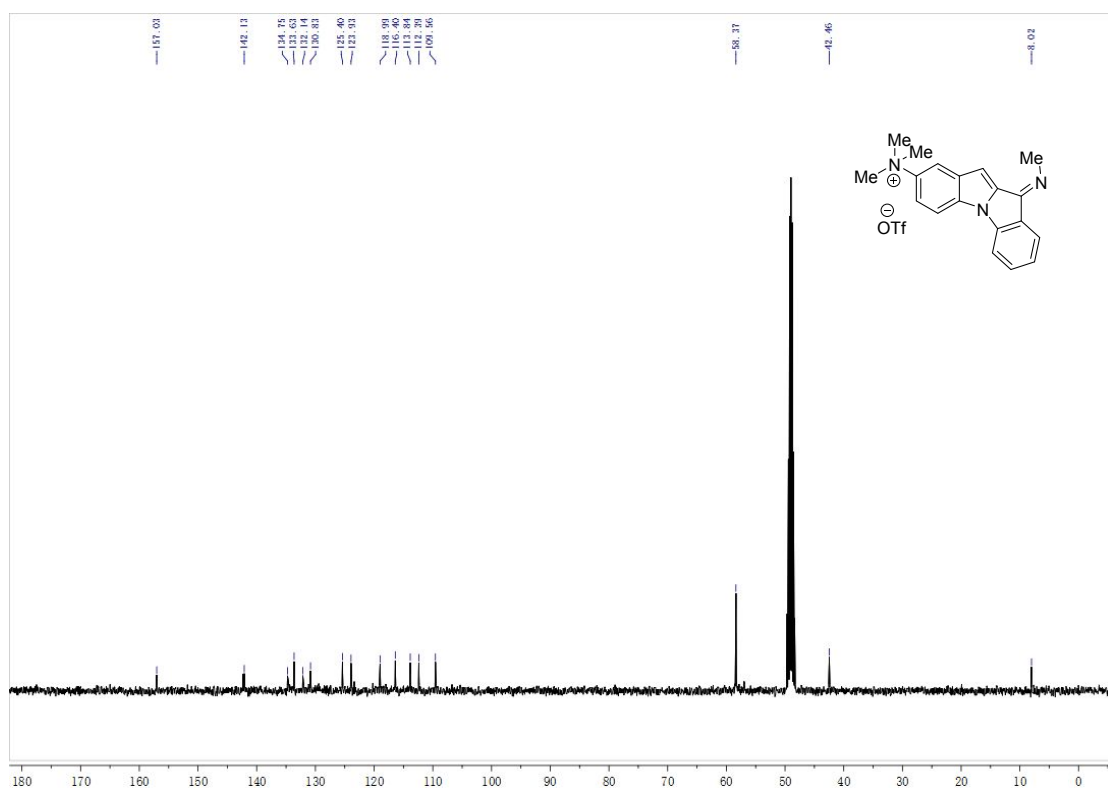

Figure S59. <sup>13</sup>C{<sup>1</sup>H} NMR for compound **3g**



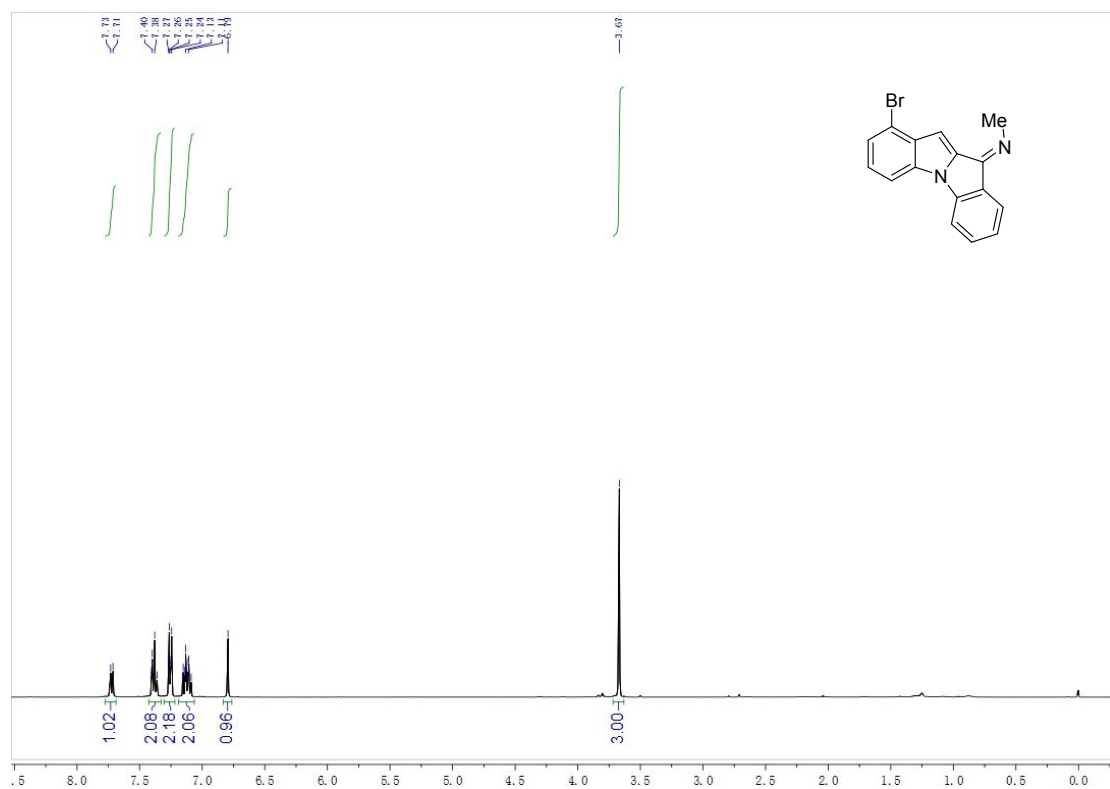

Figure S60.  $^1\text{H}$  NMR for compound **3h**

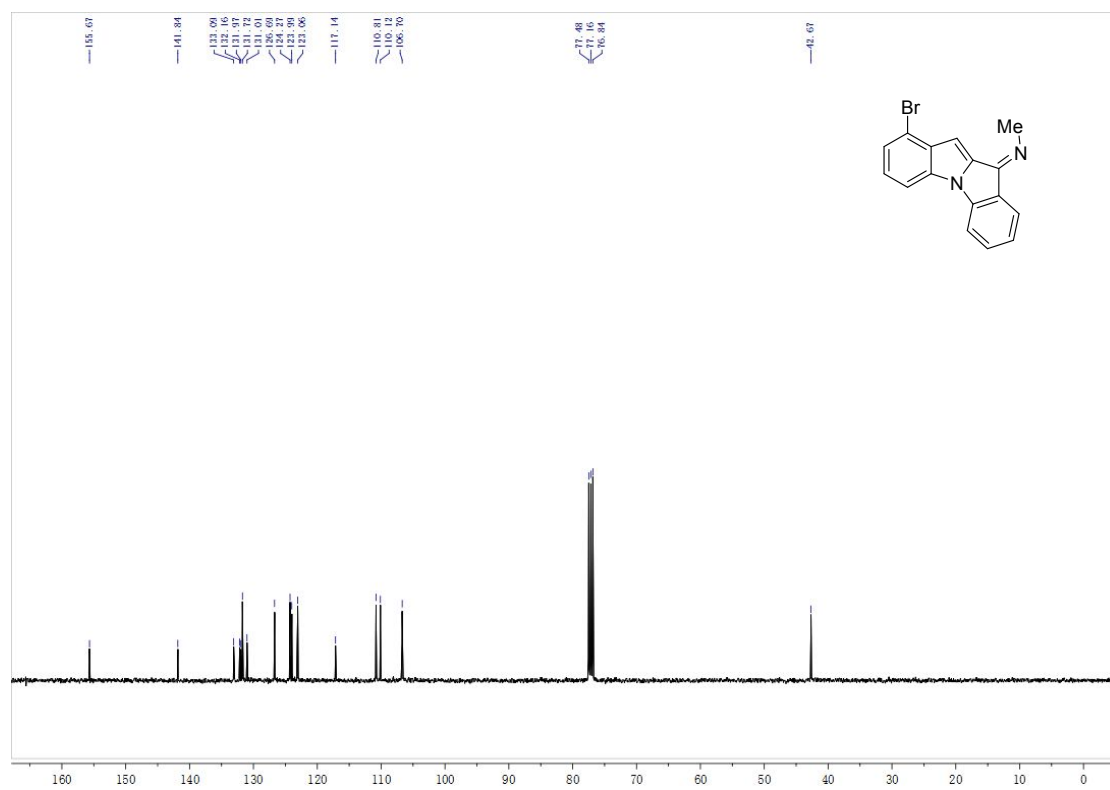

Figure S61.  $^{13}\text{C}$   $\{^1\text{H}\}$  NMR for compound **3h**

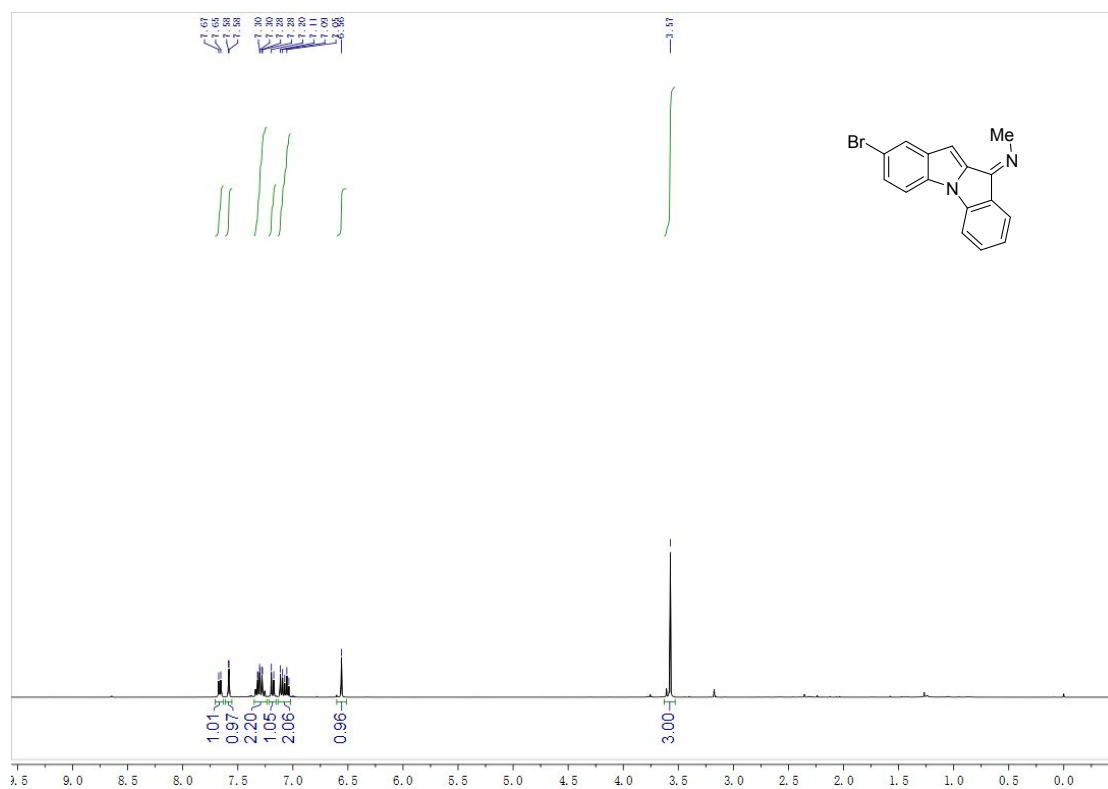

Figure S62.  $^1\text{H NMR}$  for compound **3i**

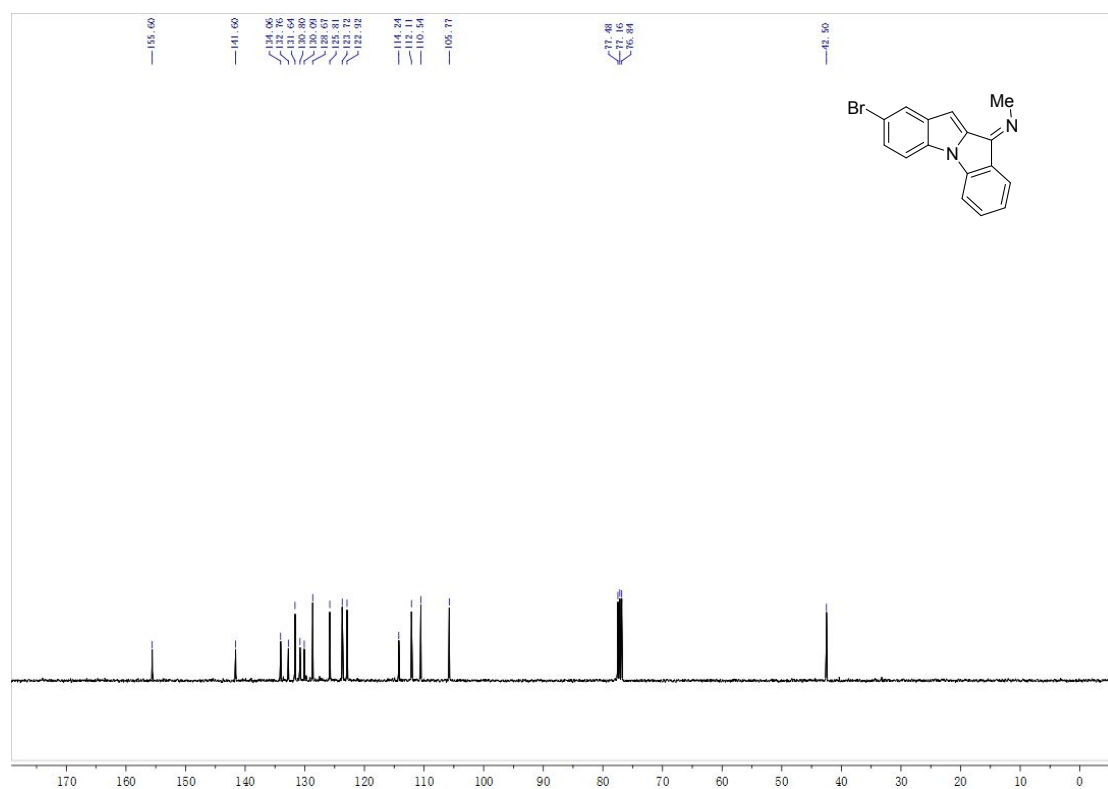

Figure S63.  $^{13}\text{C}\{^1\text{H}\}$  NMR for compound **3i**

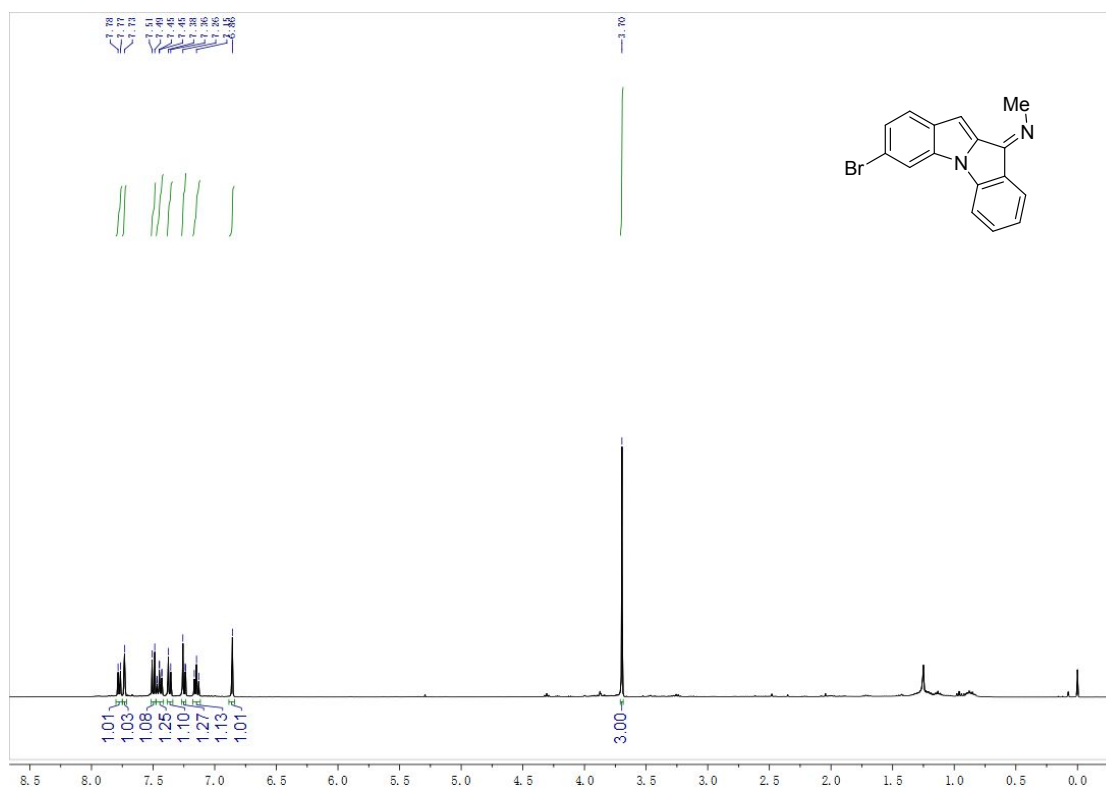

Figure S64.  $^1\text{H NMR}$  for compound **3j**

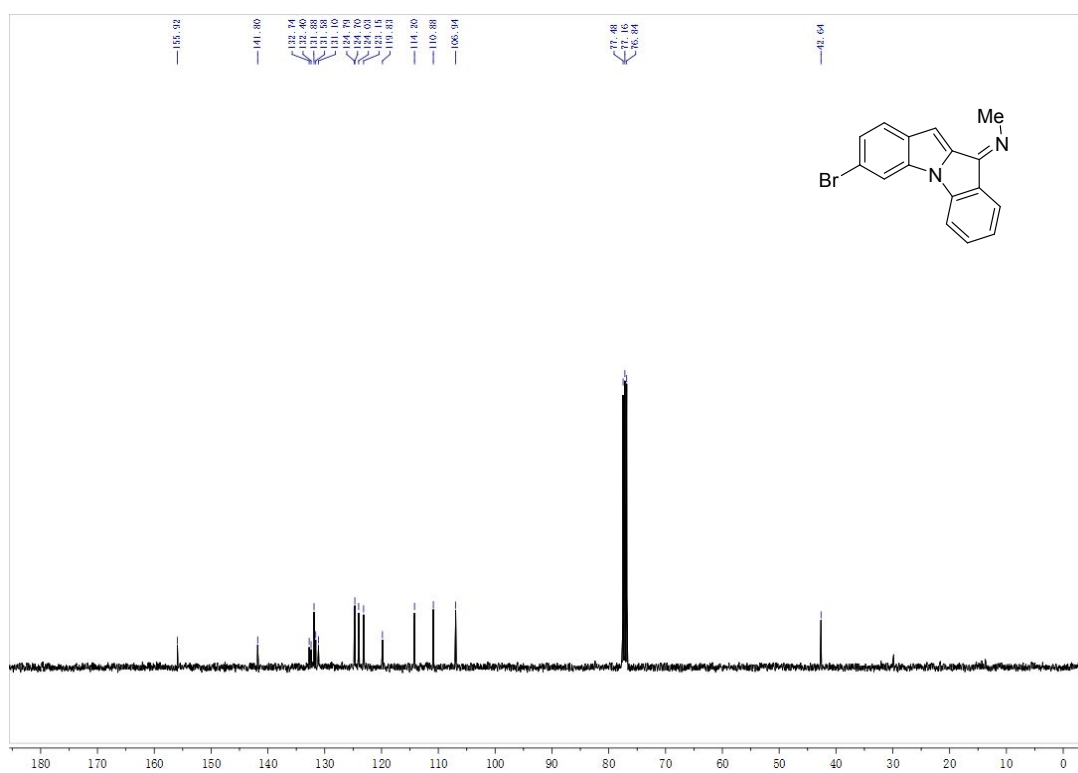

Figure S65.  $^{13}\text{C}\{^1\text{H}\}$  NMR for compound **3j**

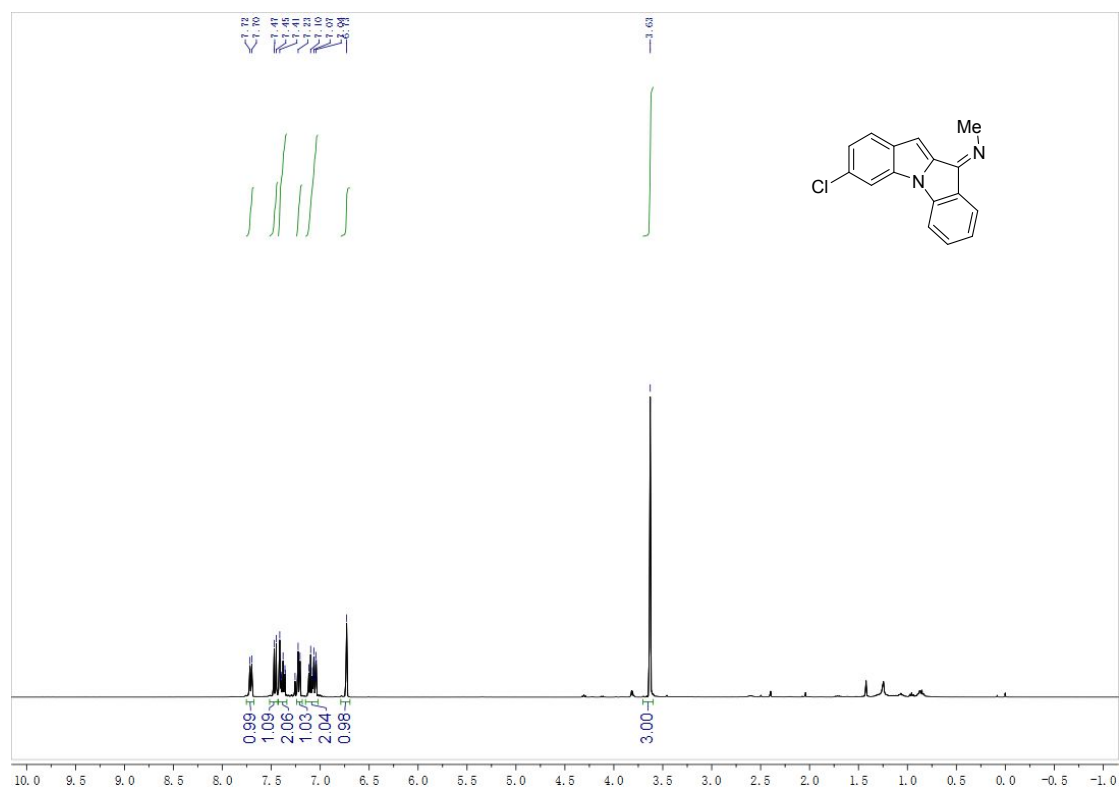

Figure S66.  $^1\text{H NMR}$  for compound **3k**

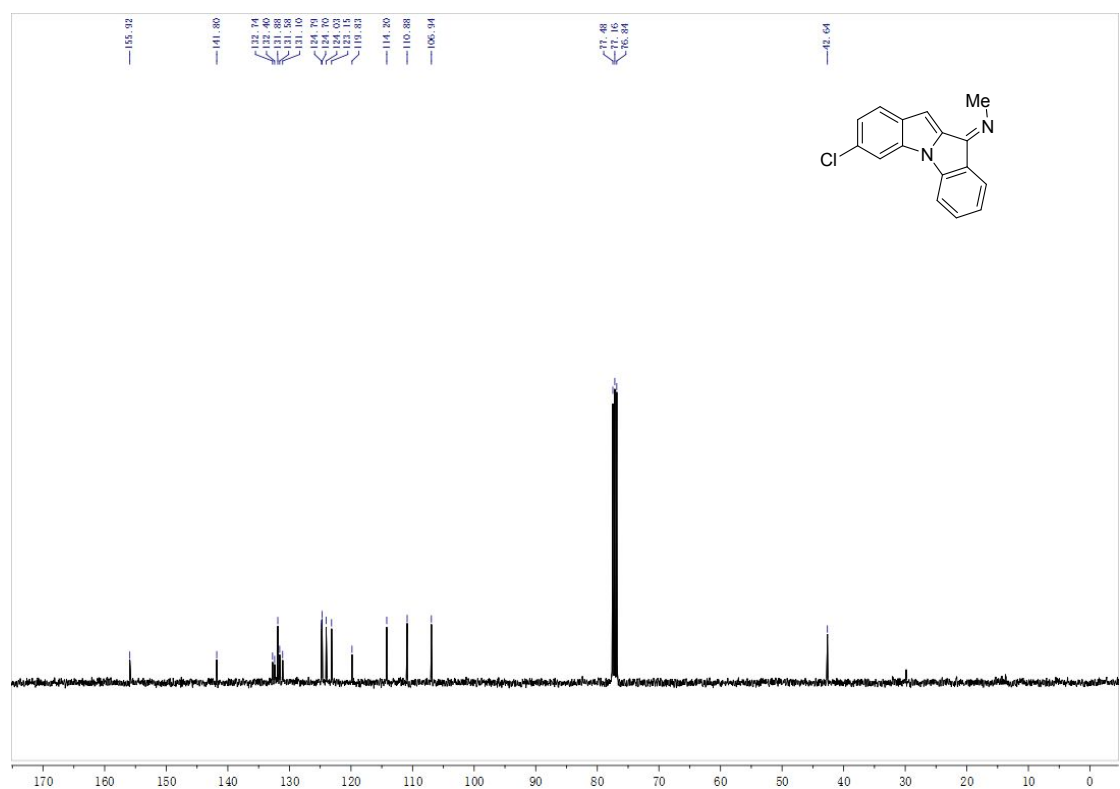

Figure S67.  $^{13}\text{C}\{^1\text{H}\}$  NMR for compound **3k**

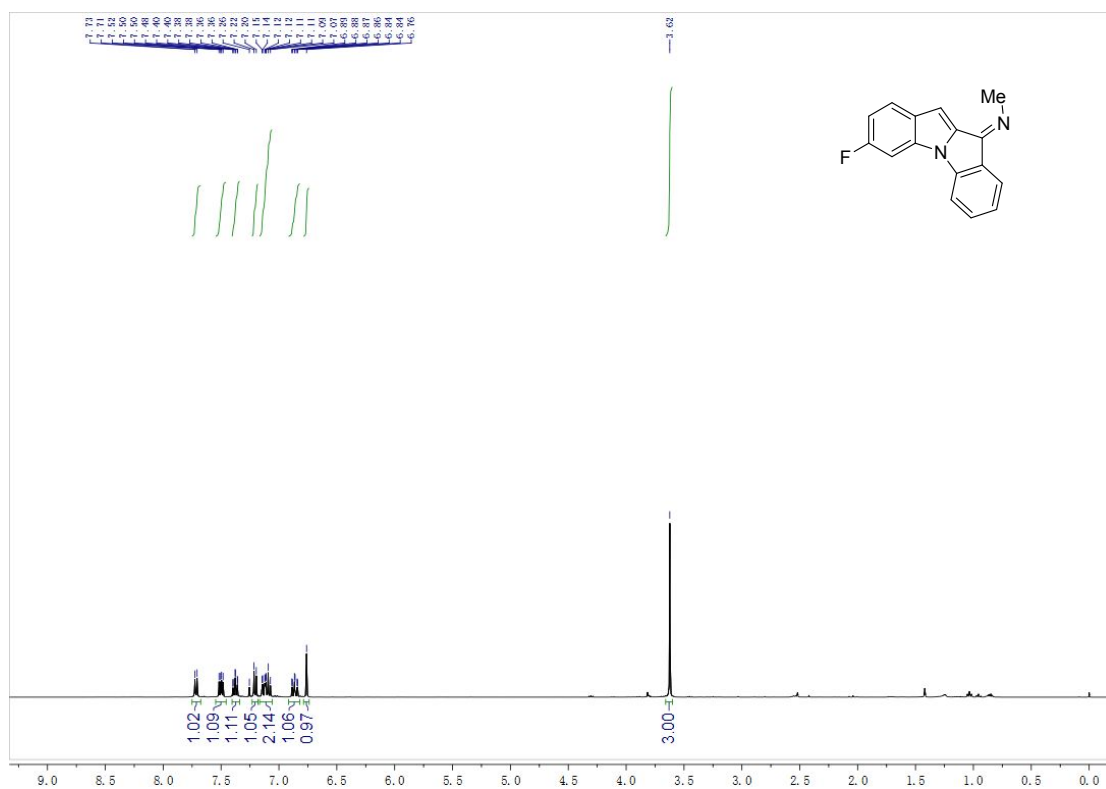

Figure S68.  $^1\text{H NMR}$  for compound **31**

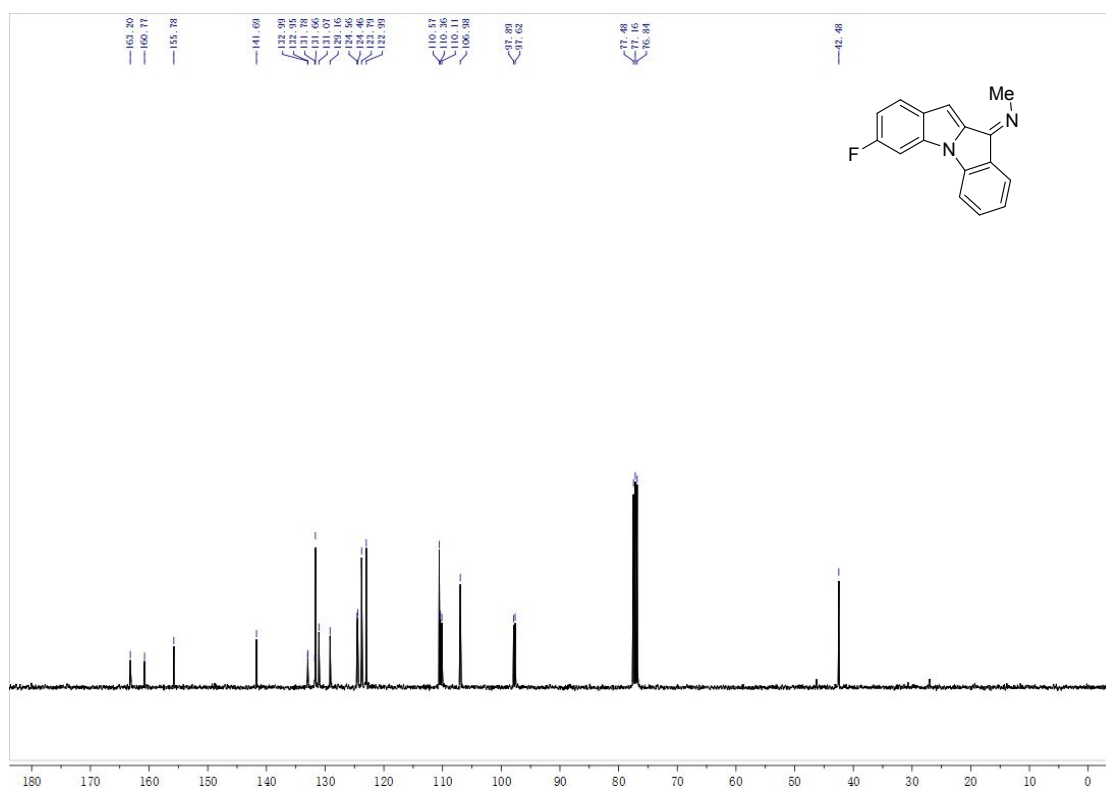

Figure S69.  $^{13}\text{C}\{^1\text{H}\}$  NMR for compound **31**

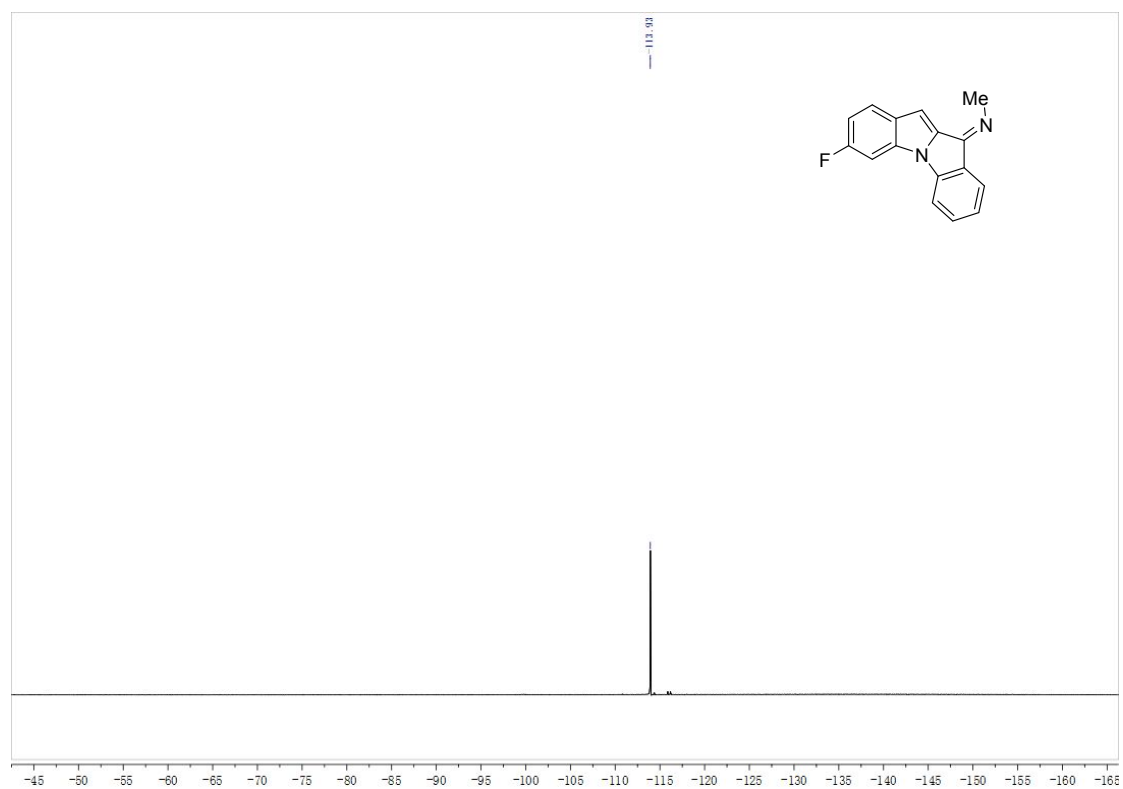

Figure S70.  $^{19}\text{F}$  NMR for compound **31**

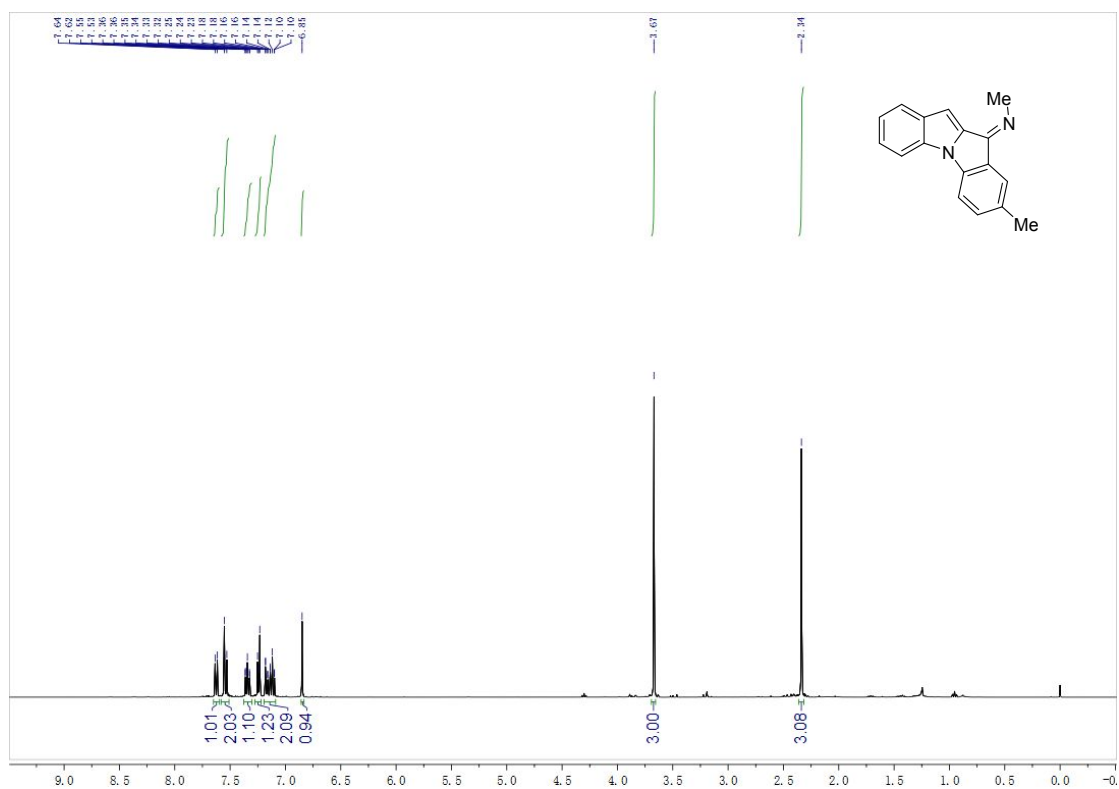

Figure S71.  $^1\text{H}$  NMR for compound **3m**

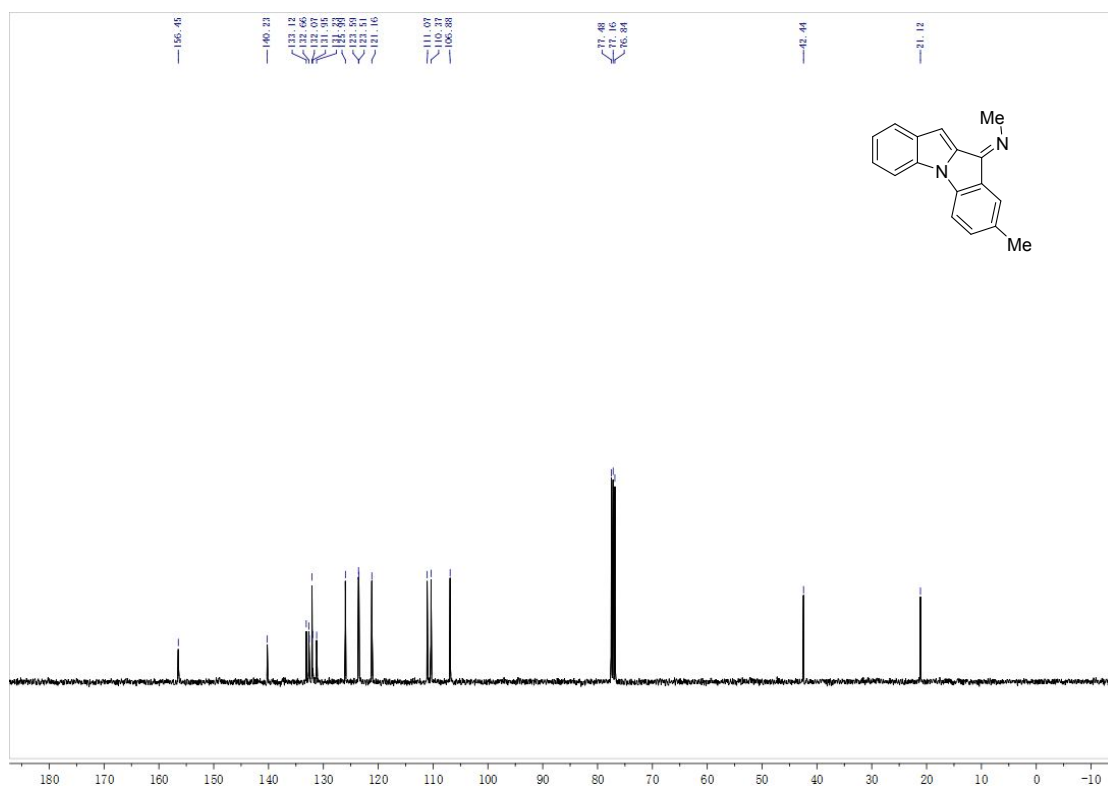

Figure S72.  $^{13}\text{C}\{^1\text{H}\}$  NMR for compound **3m**

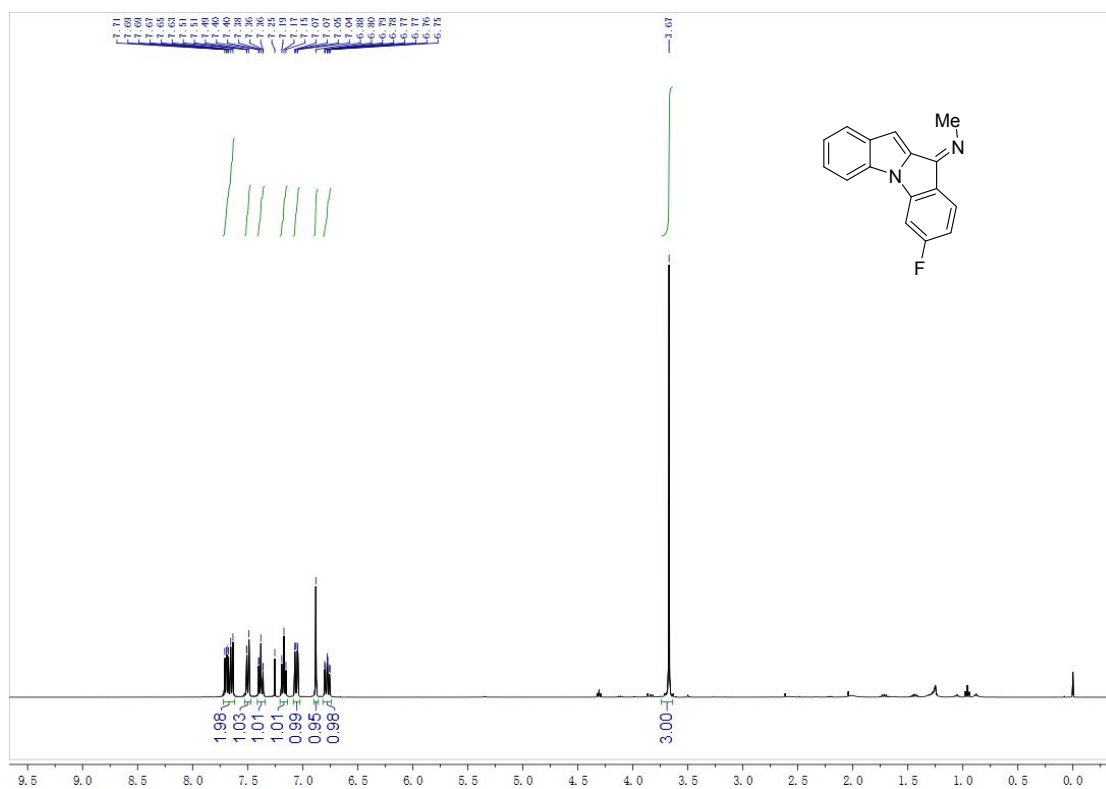

Figure S73.  $^1\text{H NMR}$  for compound **3n**

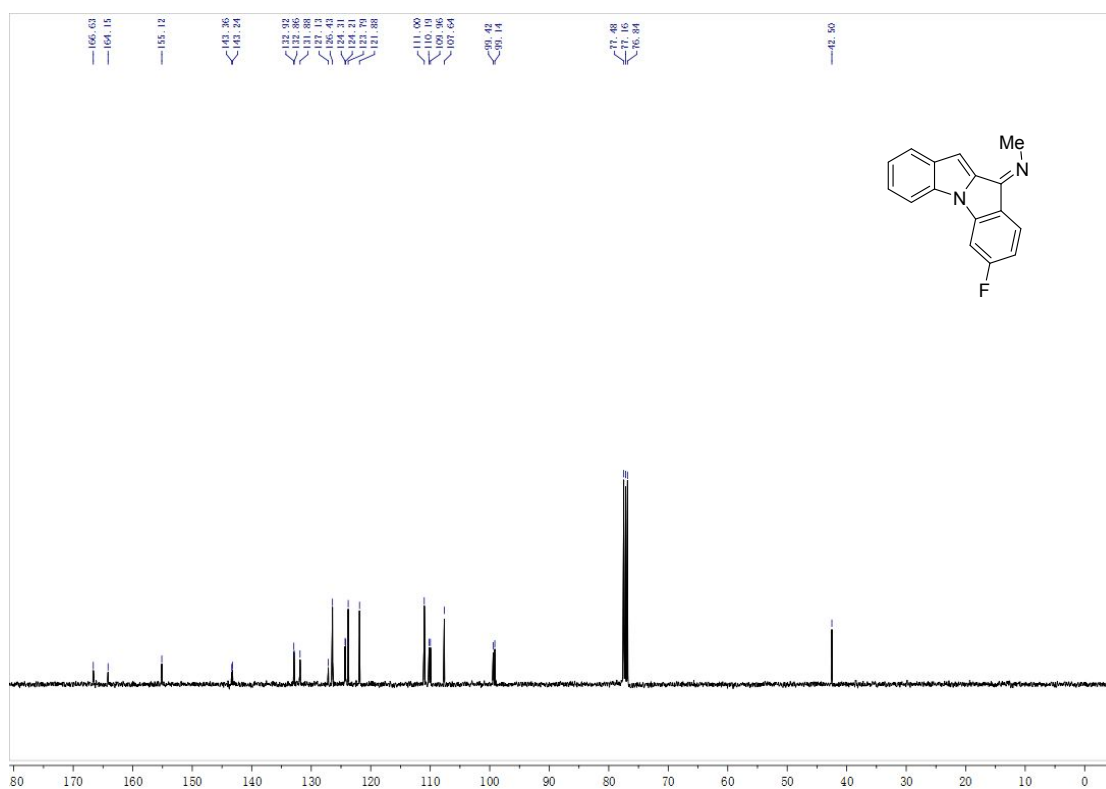

Figure S74.  $^{13}\text{C}\{^1\text{H}\}$  NMR for compound **3n**



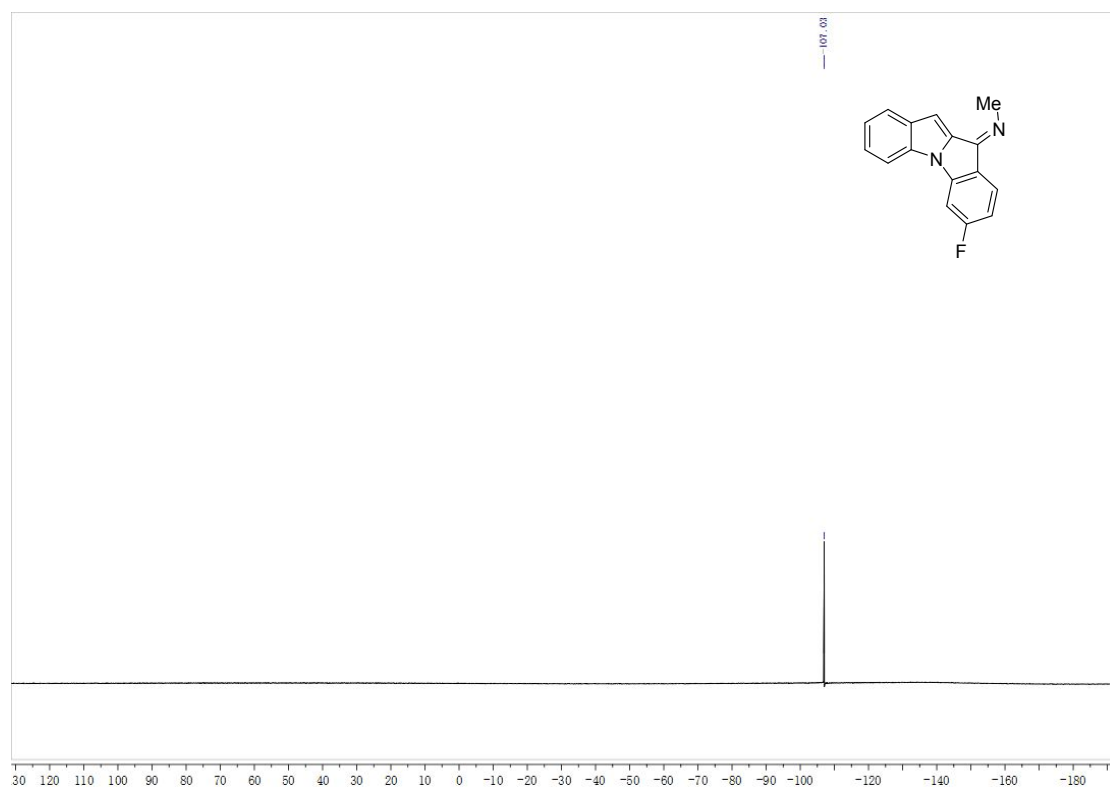

Figure S75.  $^{19}\text{F}$  NMR for compound **3n**

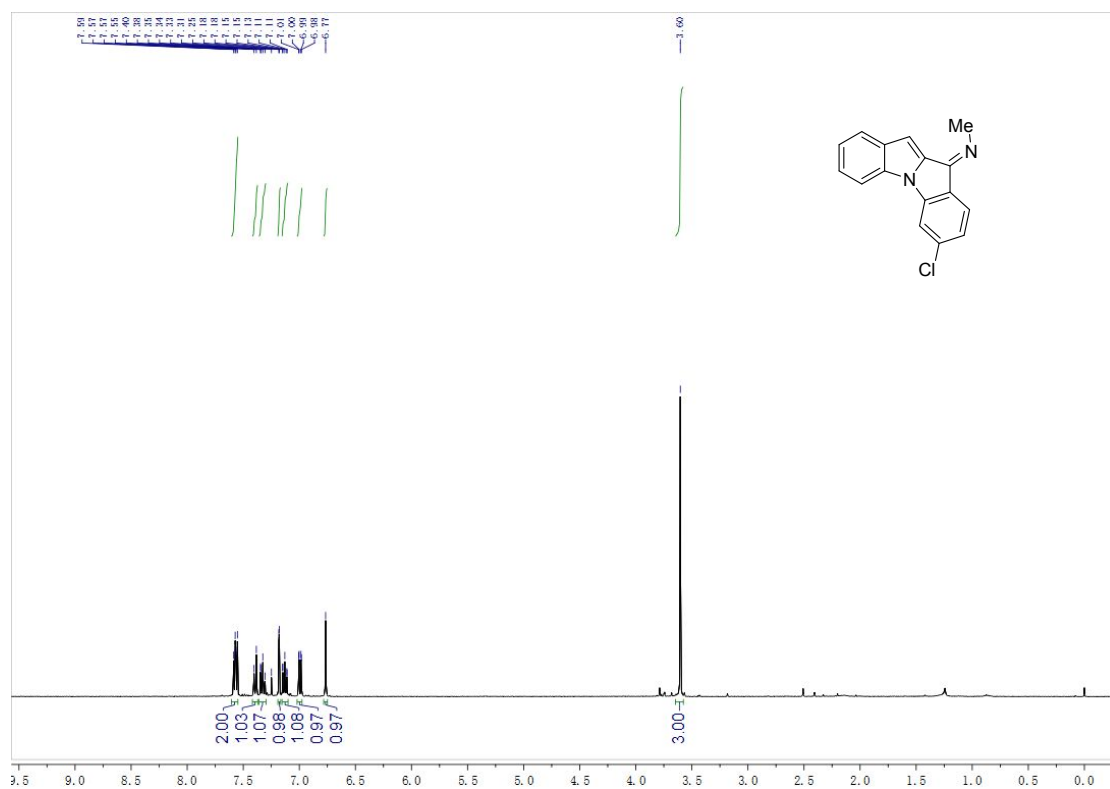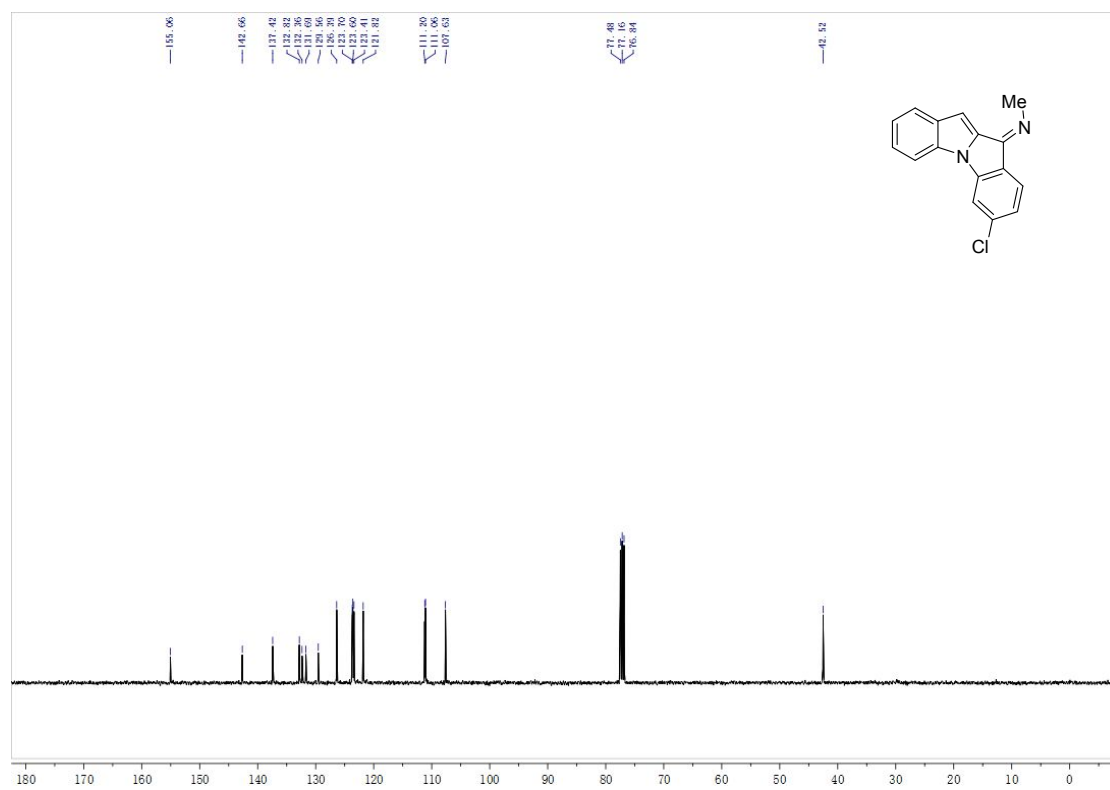

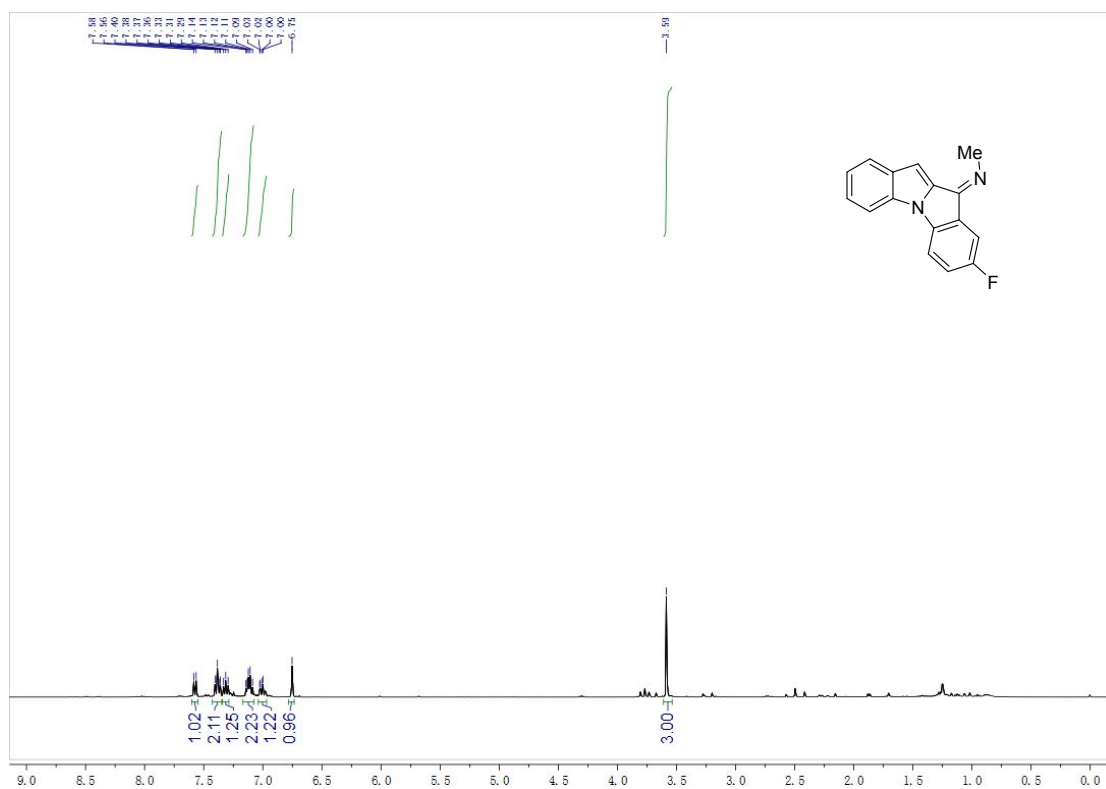

Figure S78.  $^1\text{H NMR}$  for compound **3p**

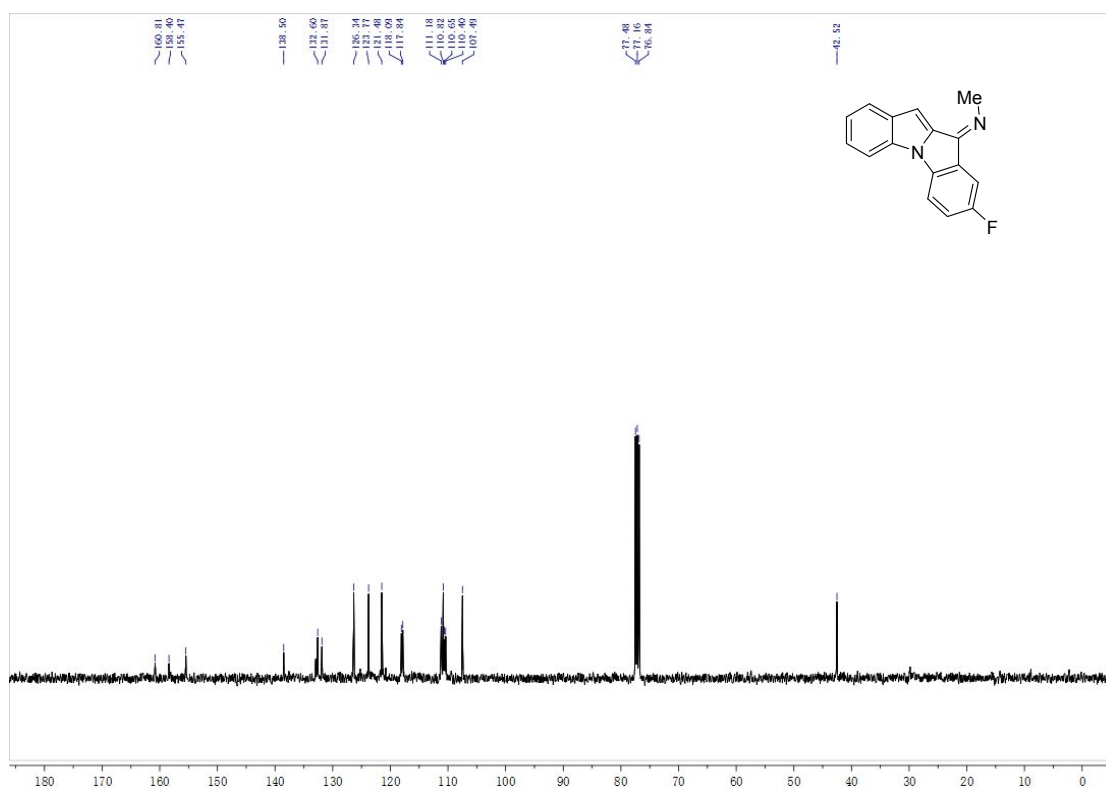

Figure S79.  $^{13}\text{C}\{^1\text{H}\}$  NMR for compound **3p**

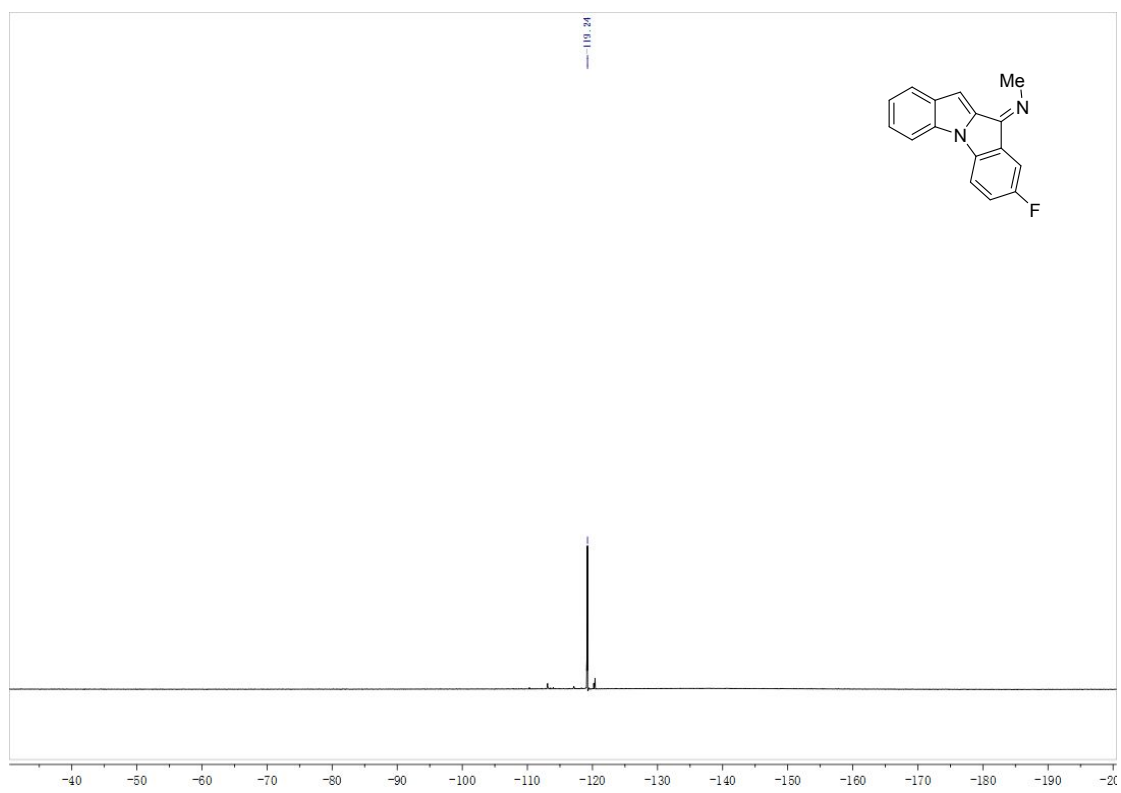

Figure S80.  $^{19}\text{F}$  NMR for compound **3p**

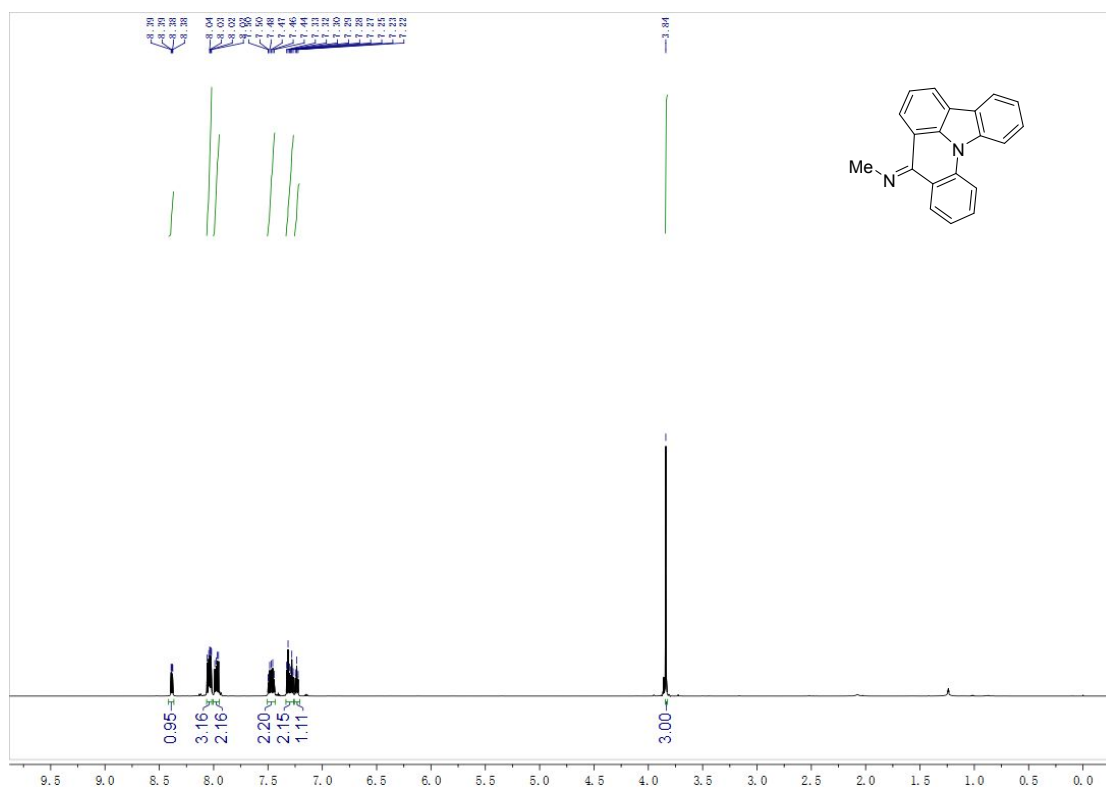

Figure S81.  $^1\text{H}$  NMR for compound **3q**

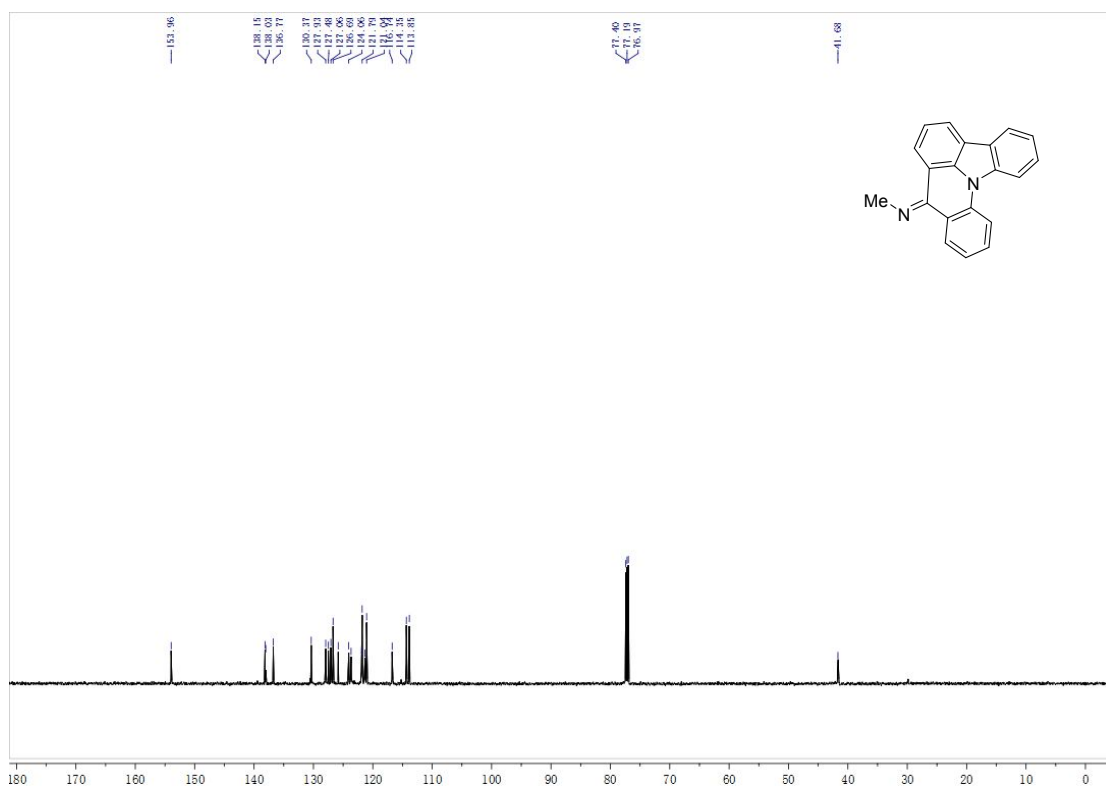

Figure S82.  $^{13}\text{C}$   $\{^1\text{H}\}$  NMR for compound **3q**

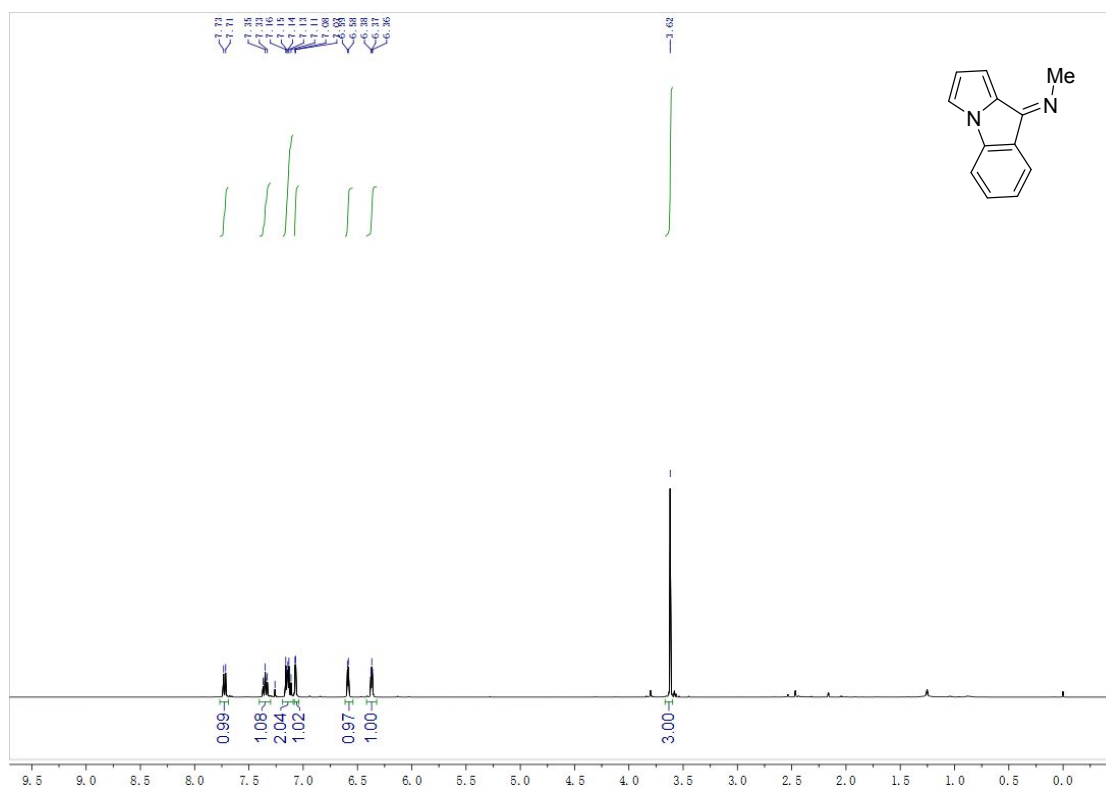

Figure S83.  $^1\text{H}$  NMR for compound **3r**

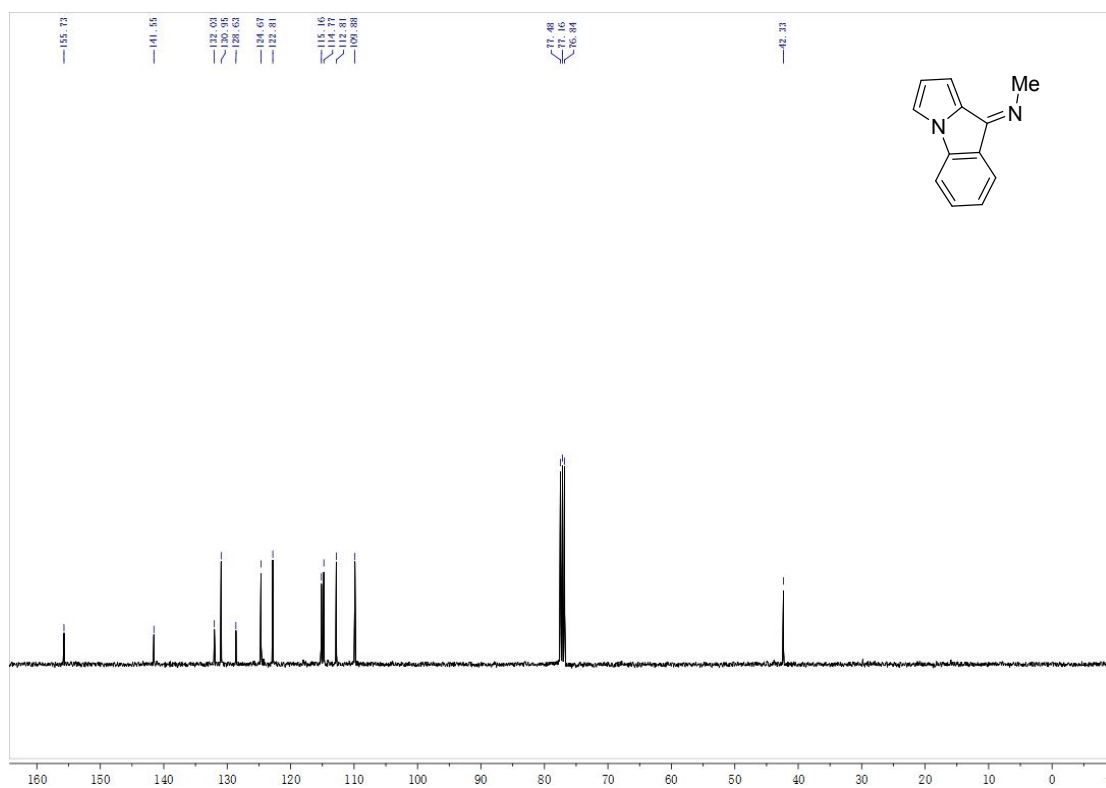

Figure S84.  $^{13}\text{C}\{^1\text{H}\}$  NMR for compound **3r**

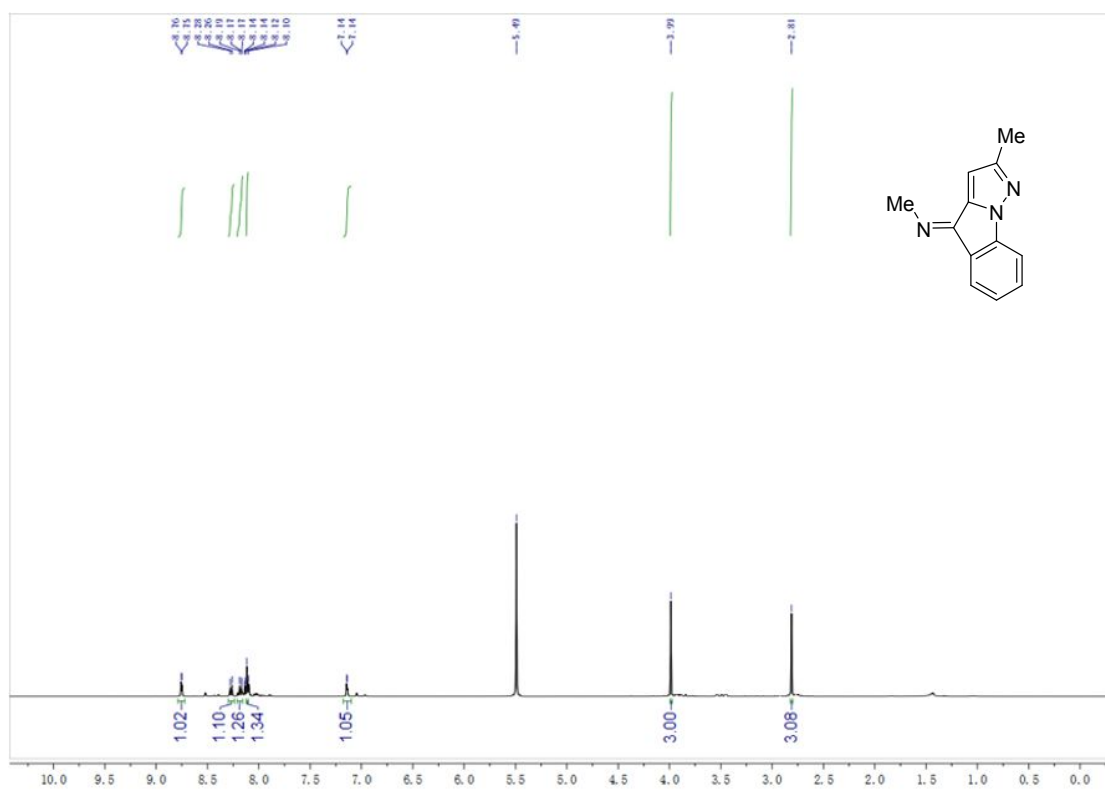

Figure S85.  $^1\text{H}$  NMR for compound **3s**

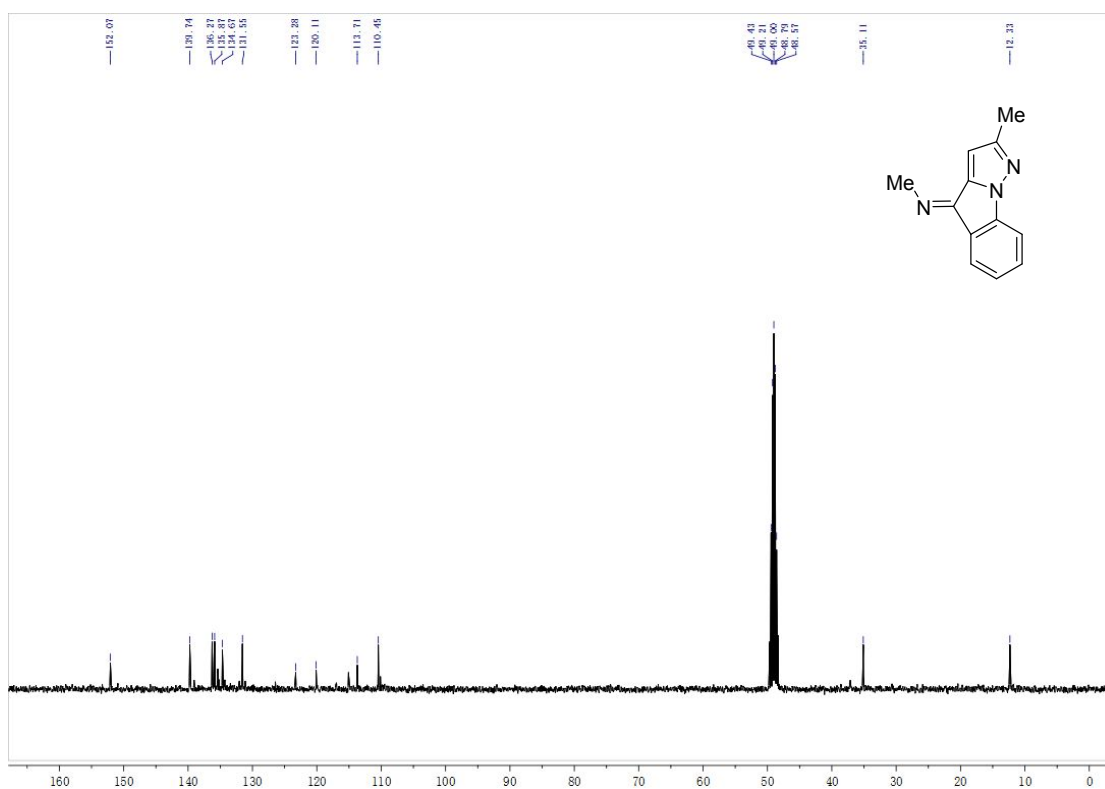

Figure S86.  $^{13}\text{C}\{^1\text{H}\}$  NMR for compound **3s**

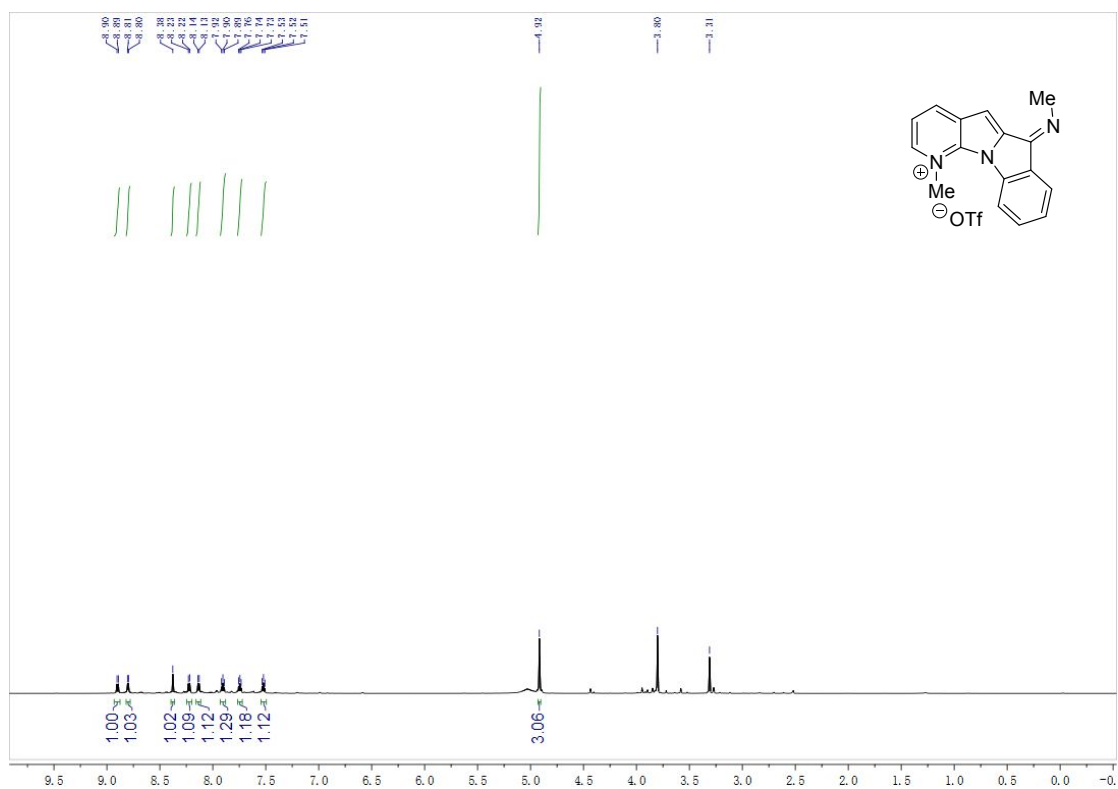

Figure S87. <sup>1</sup>H NMR for compound **3t**

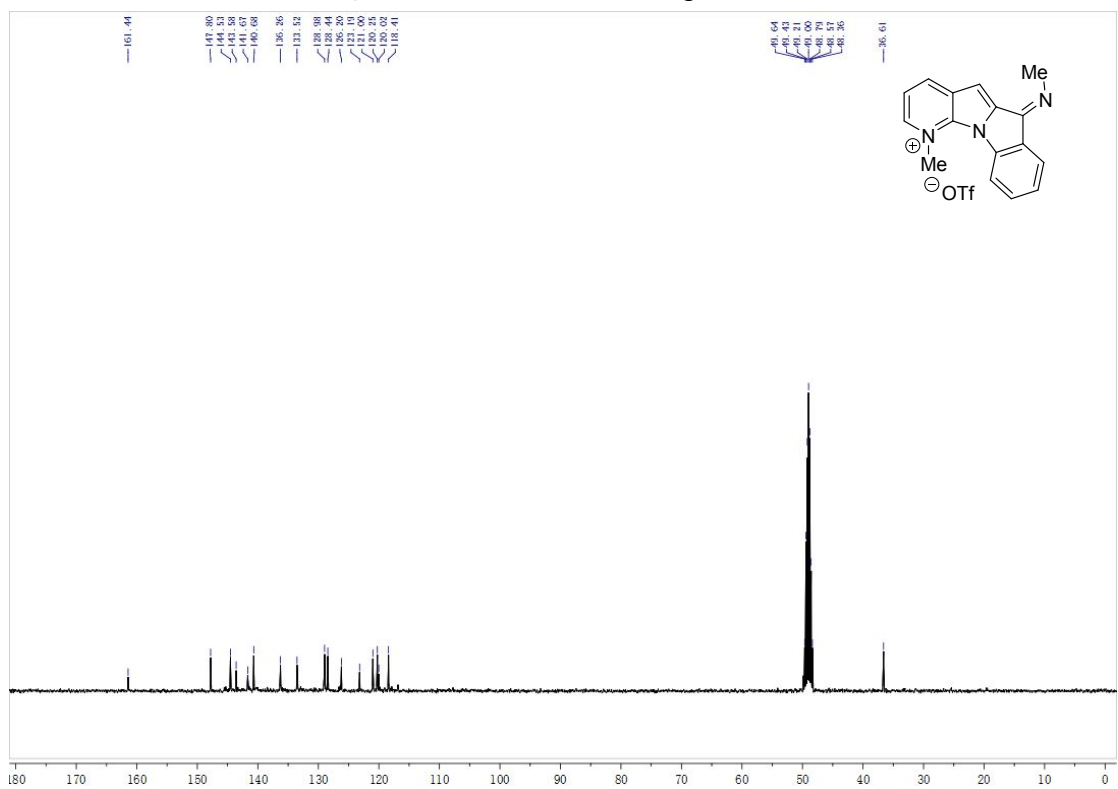

Figure S88. <sup>13</sup>C {<sup>1</sup>H} NMR for compound **3t**



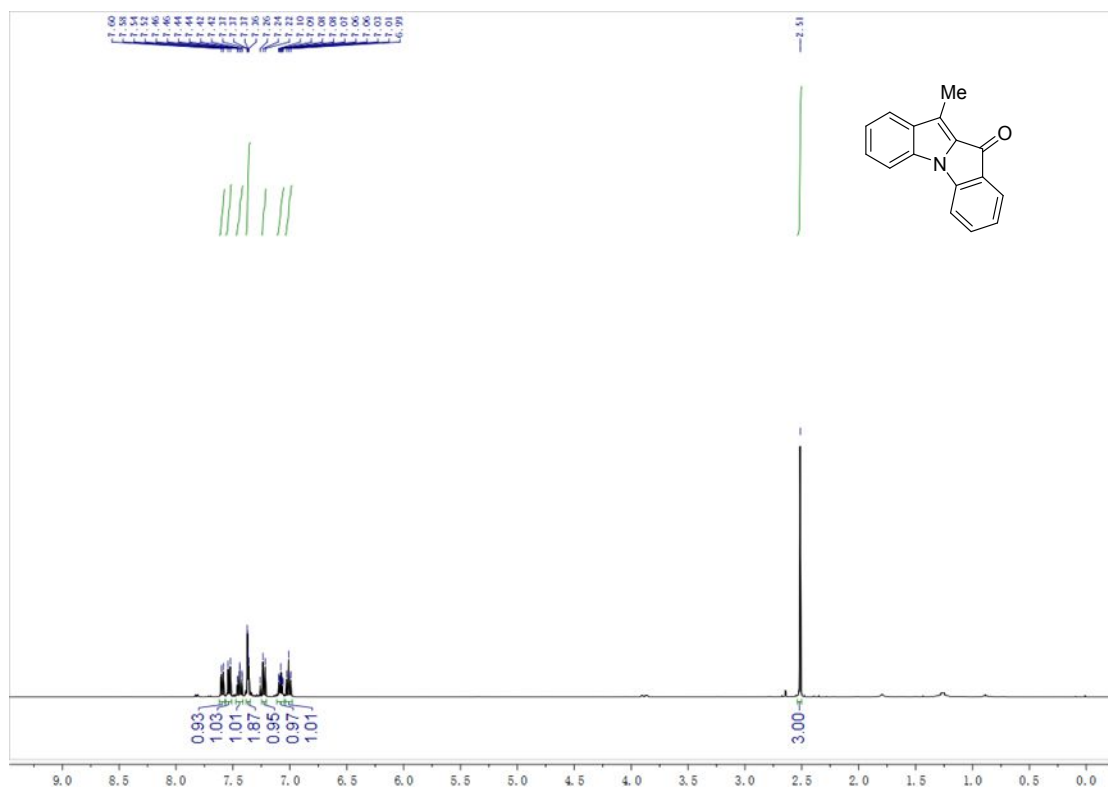

Figure S89.  $^1\text{H NMR}$  for compound **4a**

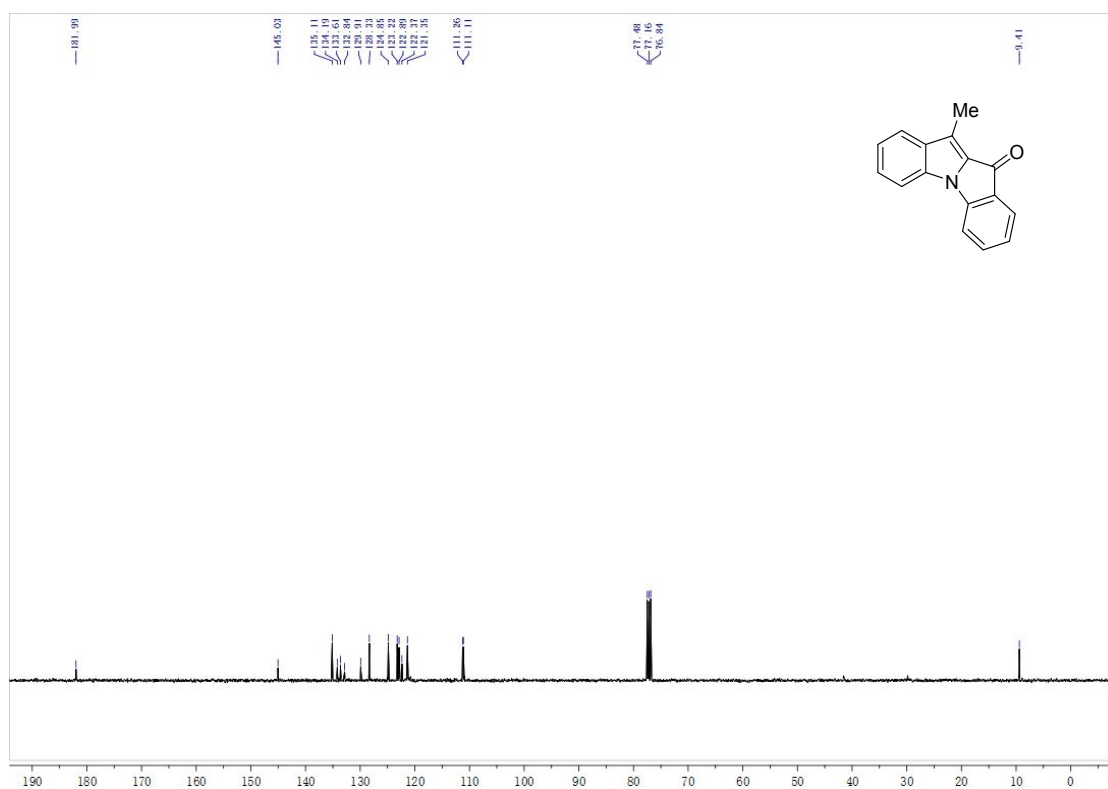

Figure S90.  $^{13}\text{C}\{^1\text{H}\}$  NMR for compound **4a**

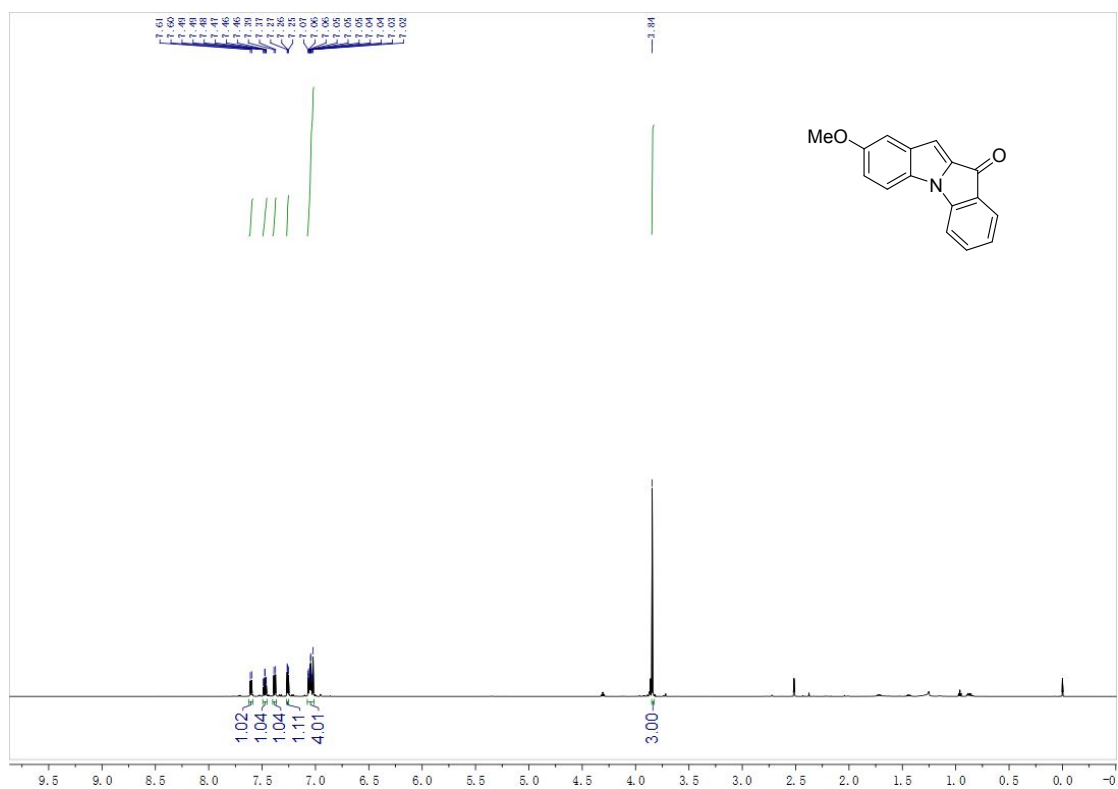

Figure S91.  $^1\text{H}$  NMR for compound **4f**

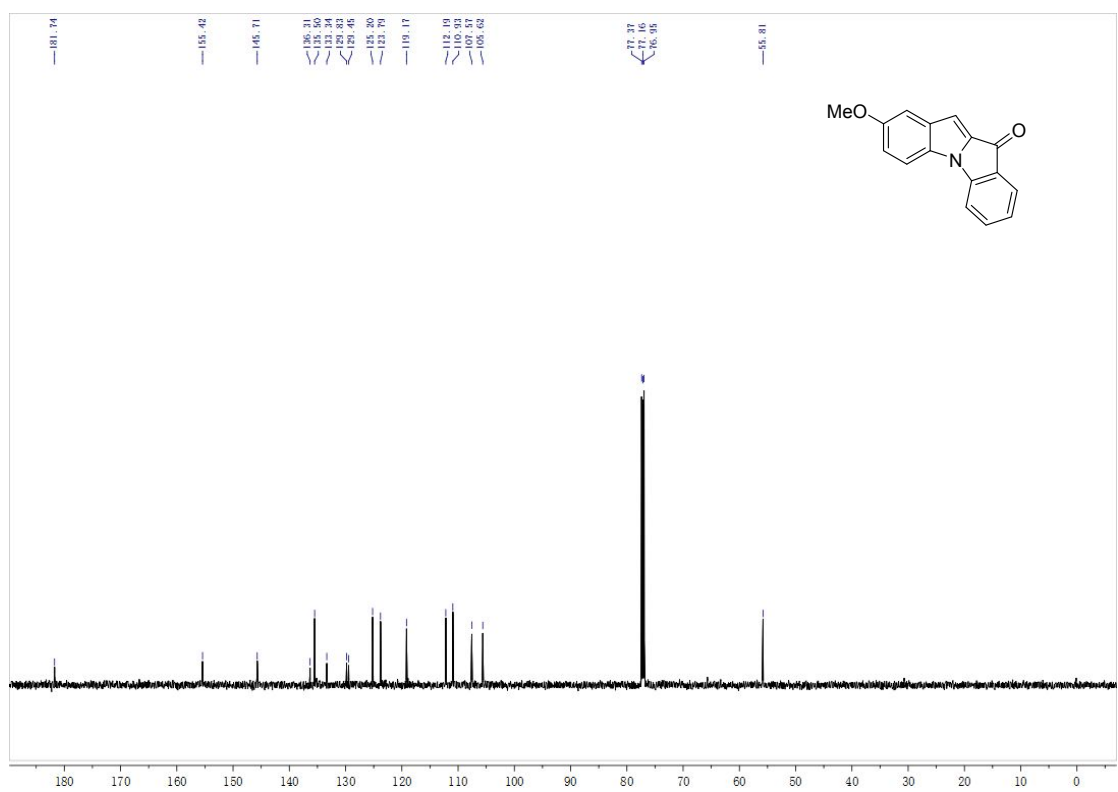

Figure S92.  $^{13}\text{C}\{^1\text{H}\}$  NMR for compound **4f**

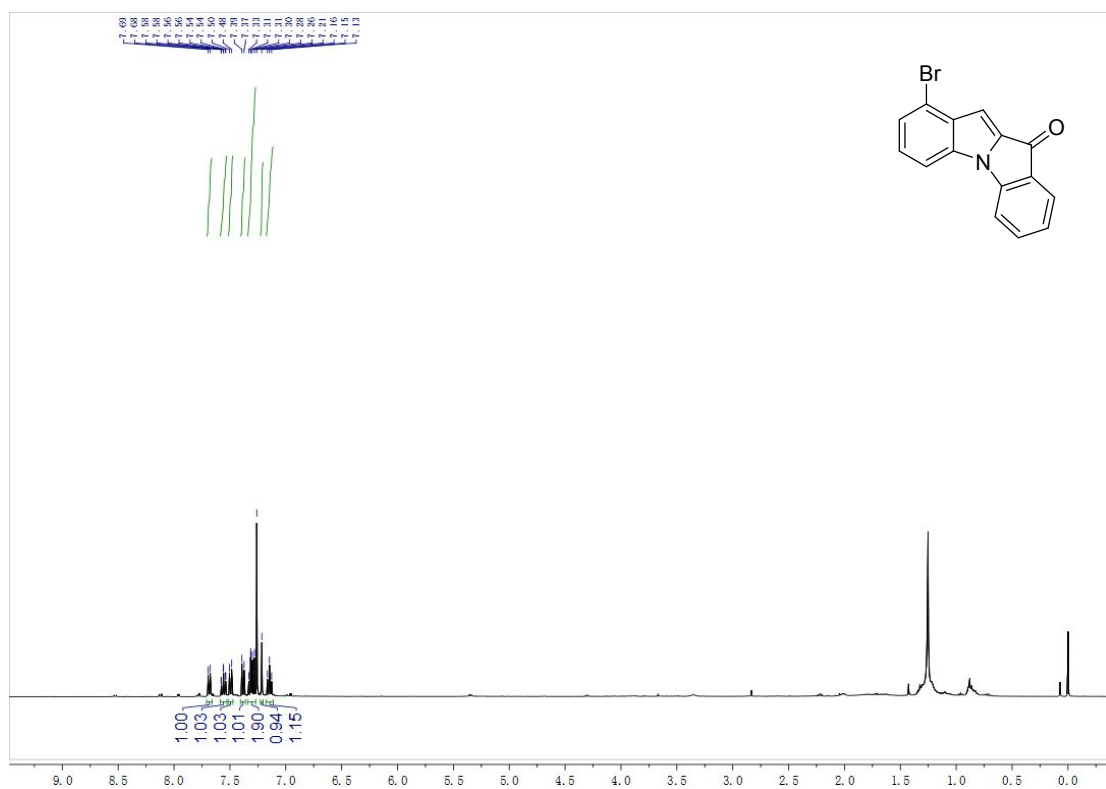

Figure S93.  $^1\text{H NMR}$  for compound **4h**

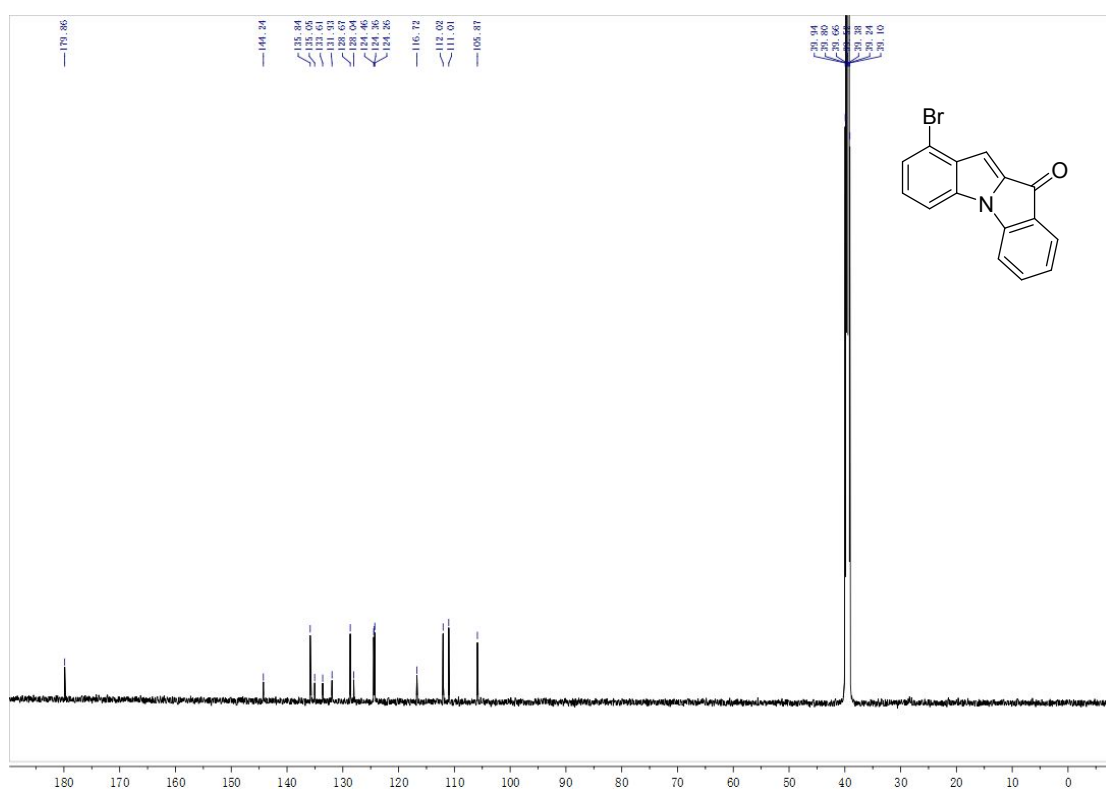

Figure S94.  $^{13}\text{C}\{^1\text{H}\}$  NMR for compound **4h**

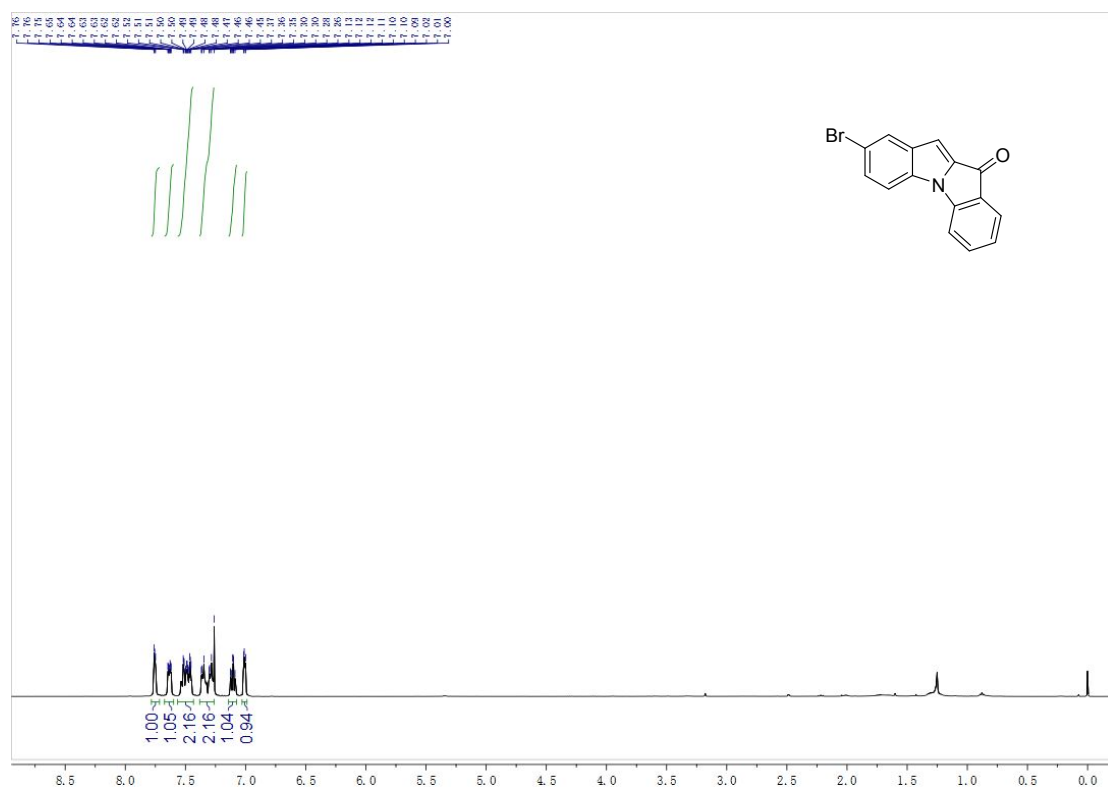

Figure S95.  $^1\text{H NMR}$  for compound **4i**

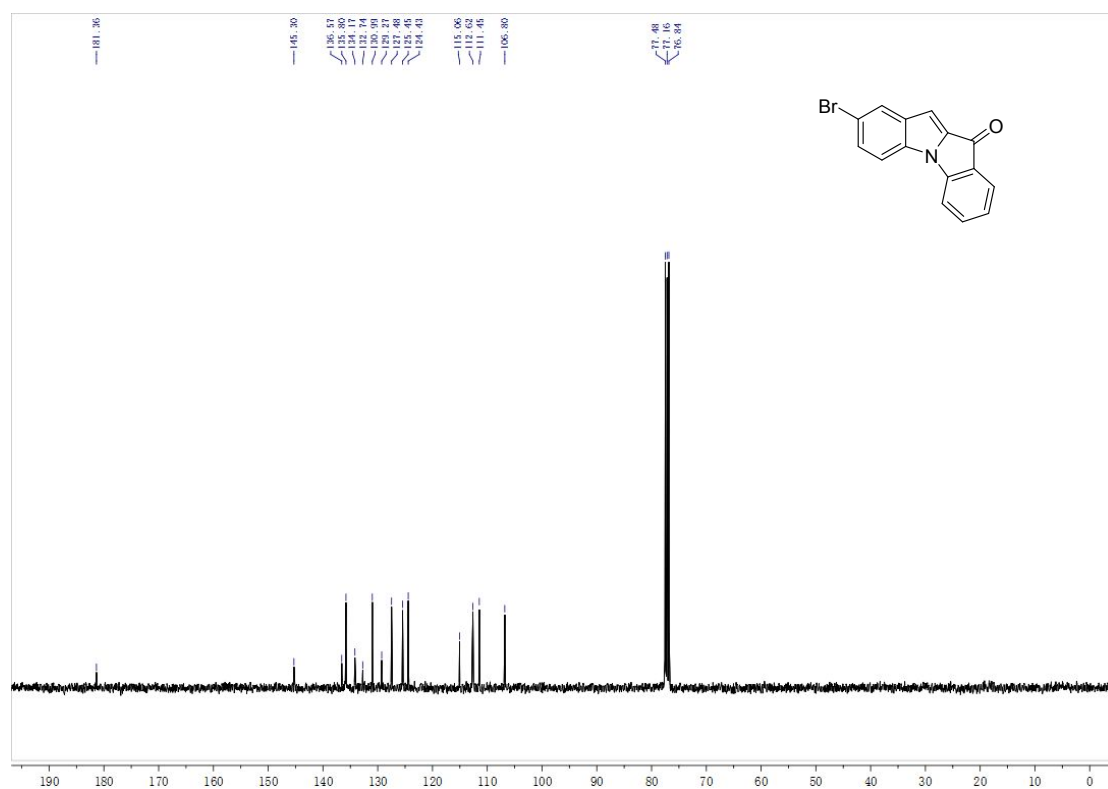

Figure S96.  $^{13}\text{C}\{^1\text{H}\}$  NMR for compound **4i**

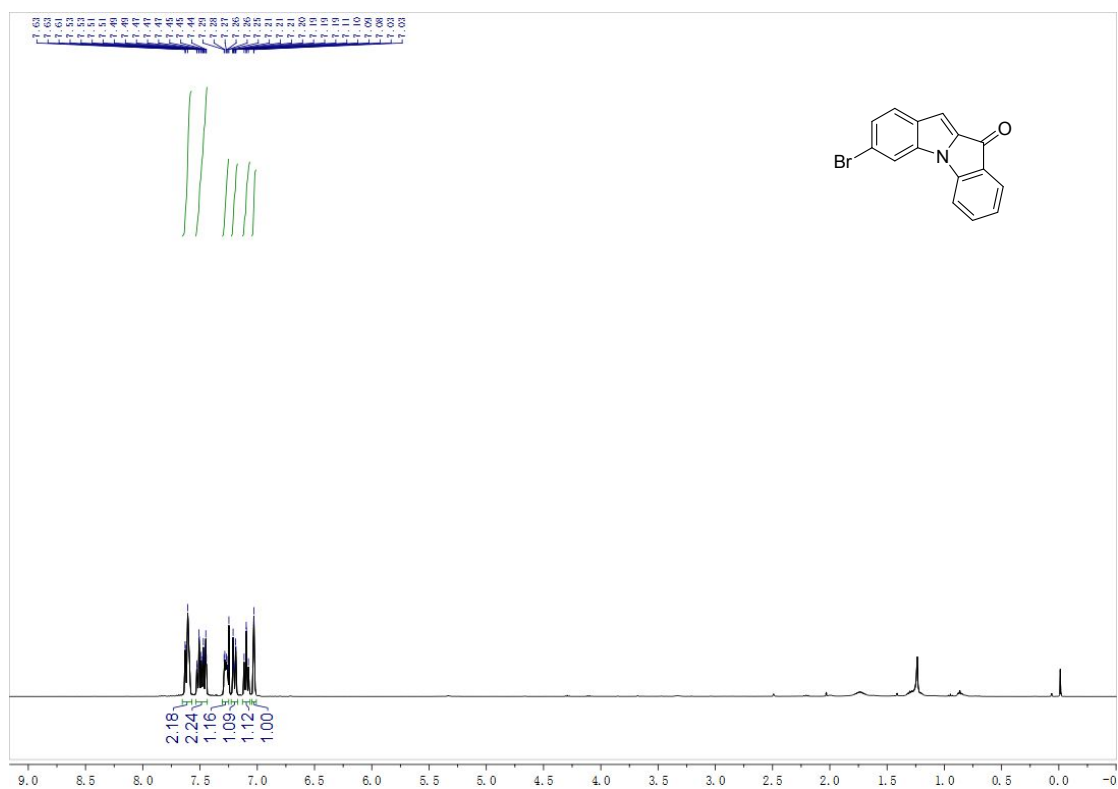

Figure S97. <sup>1</sup>H NMR for compound **4j**

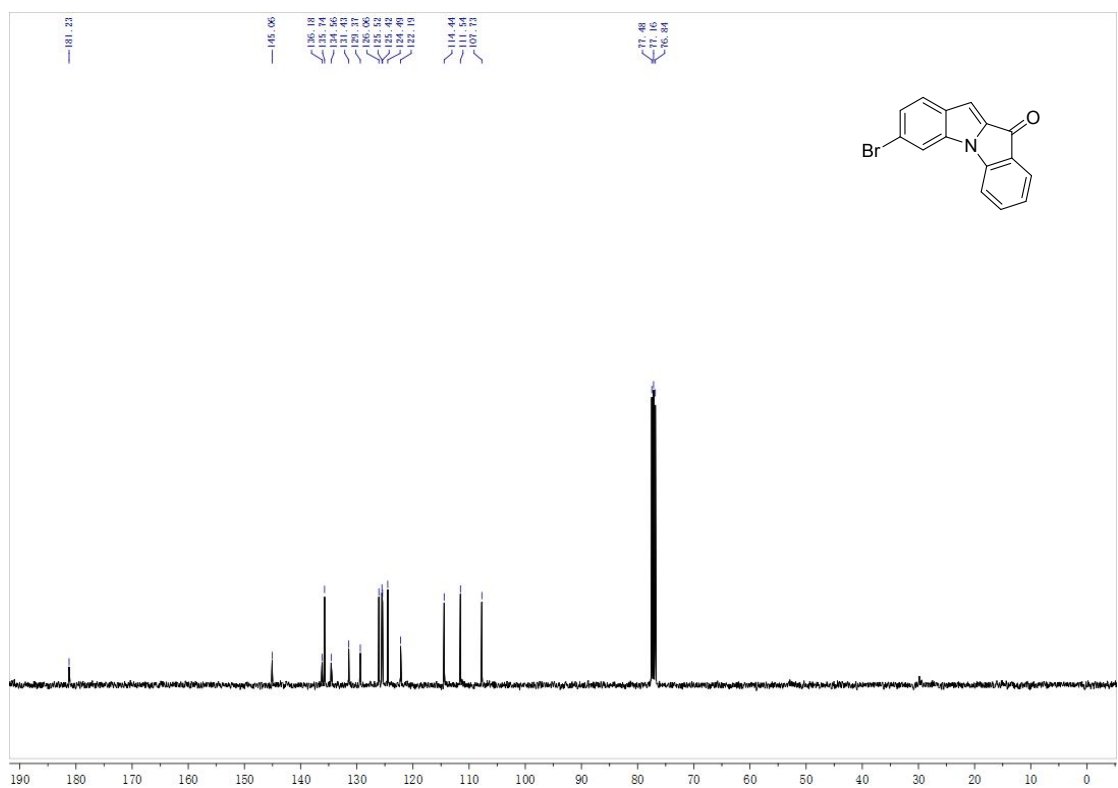

Figure S98. <sup>13</sup>C{<sup>1</sup>H} NMR for compound **4j**

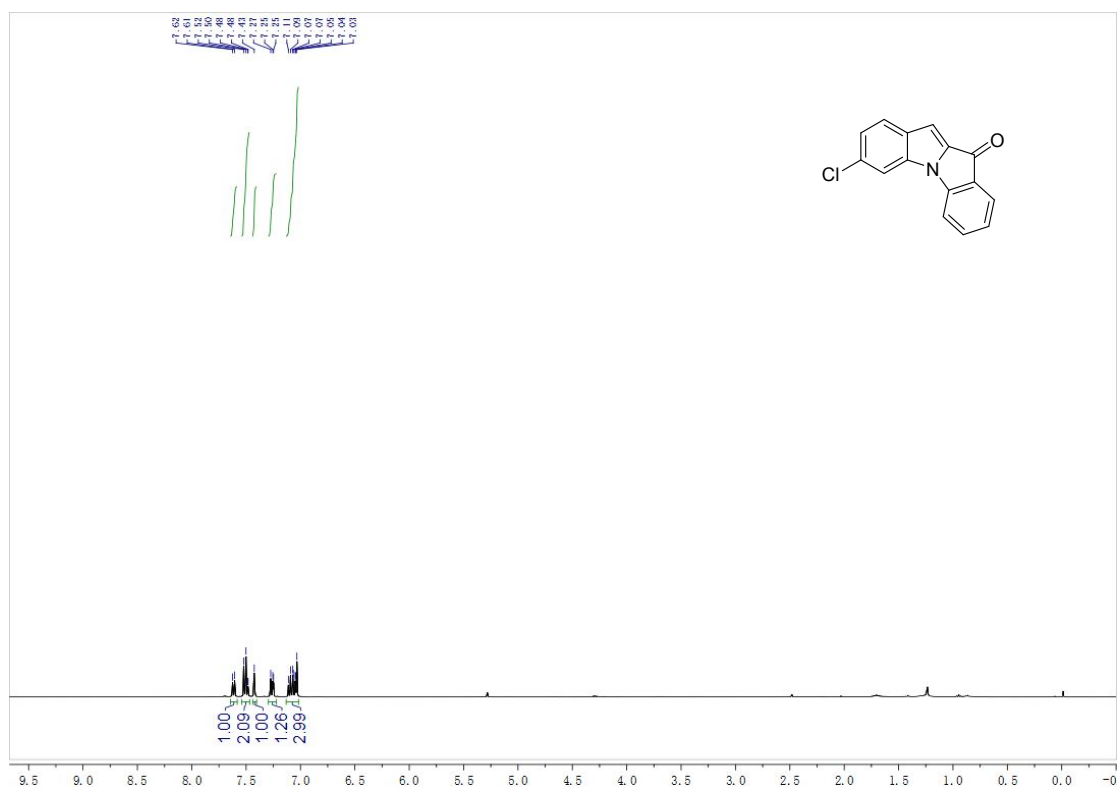

Figure S99.  $^1\text{H NMR}$  for compound **4k**

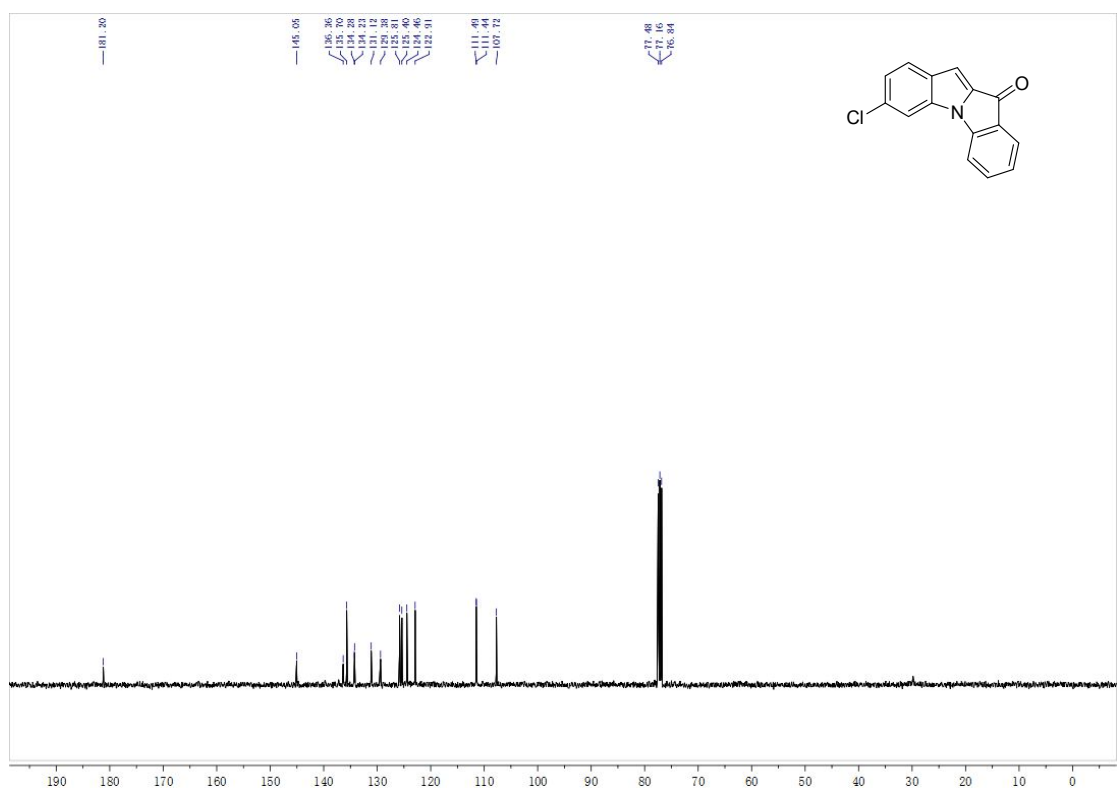

Figure S100.  $^{13}\text{C}\{^1\text{H}\}$  NMR for compound **4k**

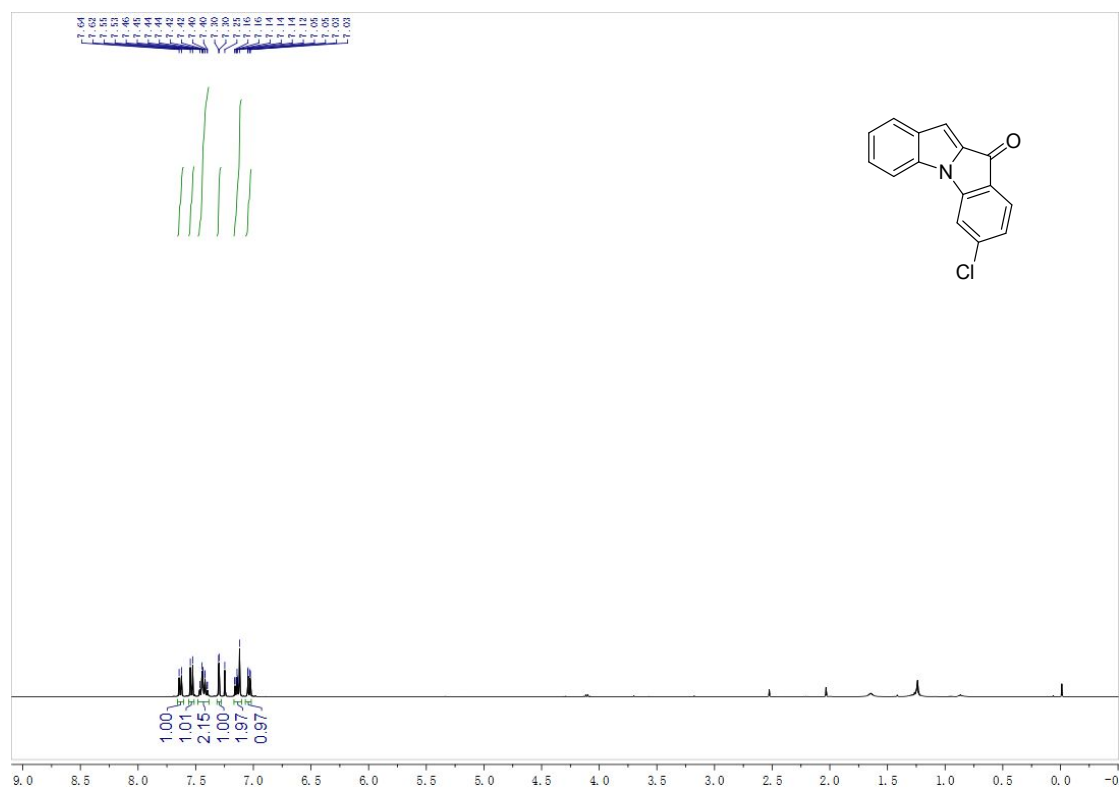

Figure S101.  $^1\text{H NMR}$  for compound **4o**

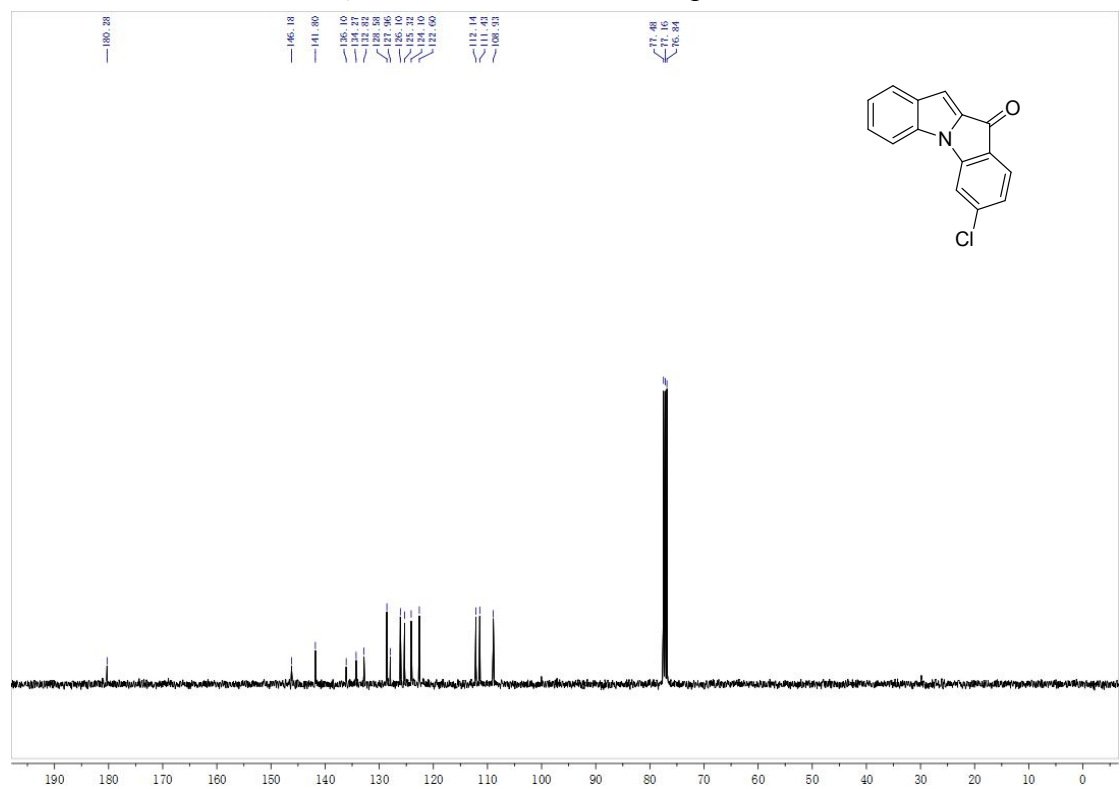

Figure S102.  $^{13}\text{C}\{^1\text{H}\}$  NMR for compound **4o**

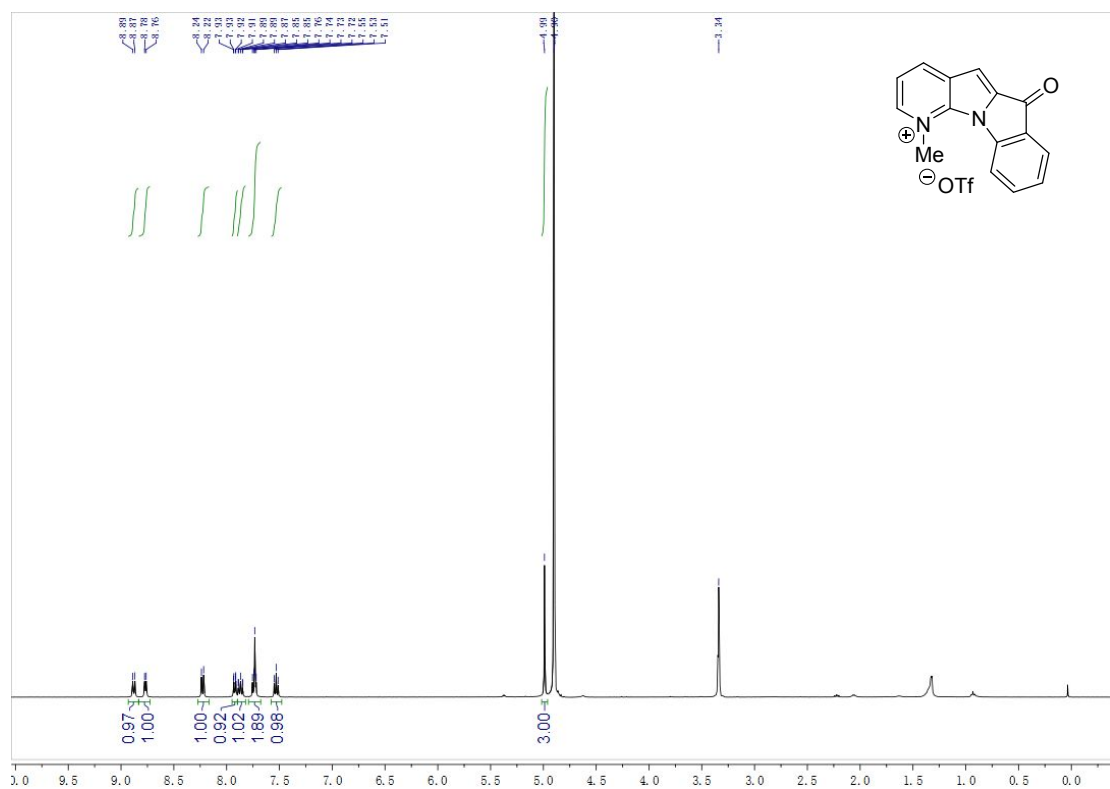

Figure S103.  $^1\text{H}$  NMR for compound 4t

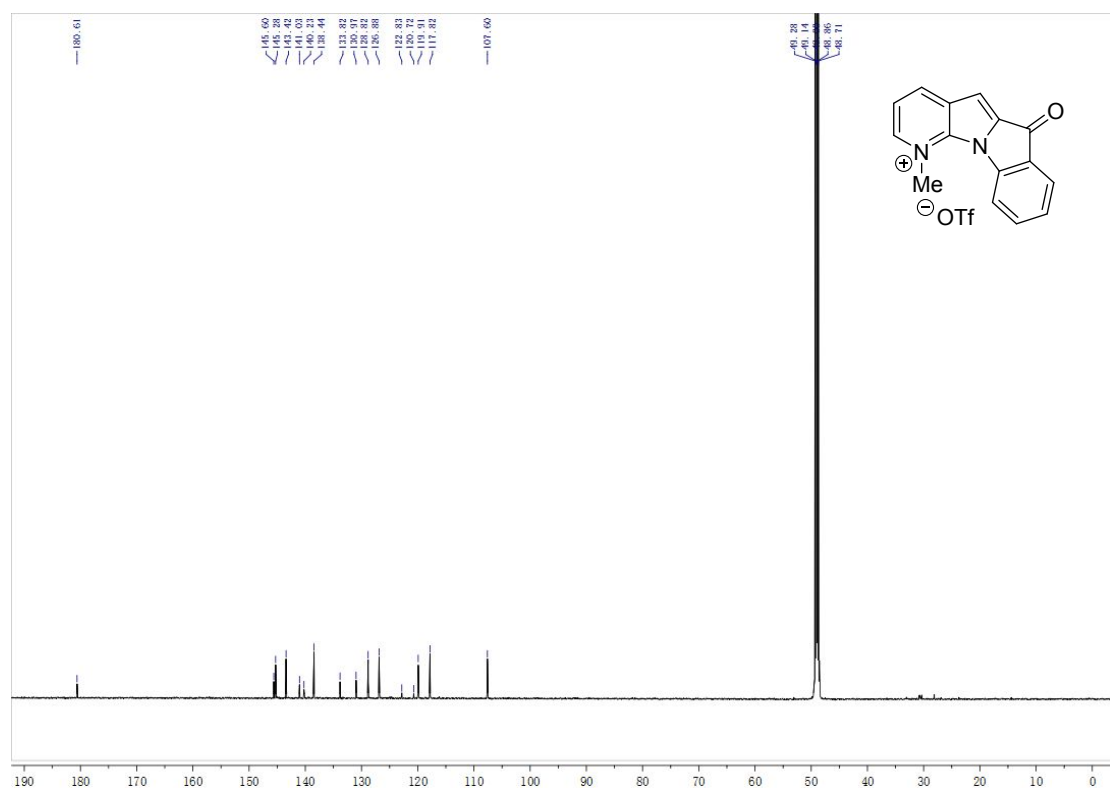

Figure S104.  $^{13}\text{C}\{^1\text{H}\}$  NMR for compound 4t



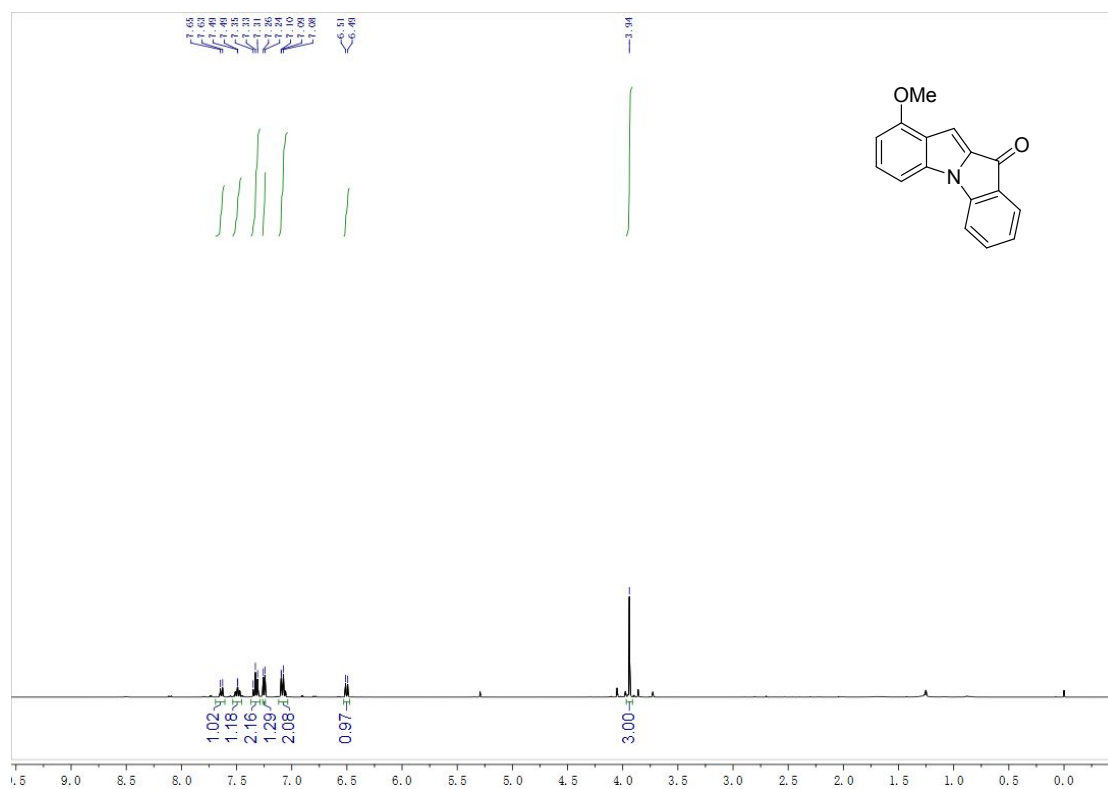

Figure S105.  $^1\text{H}$  NMR for compound **4u**

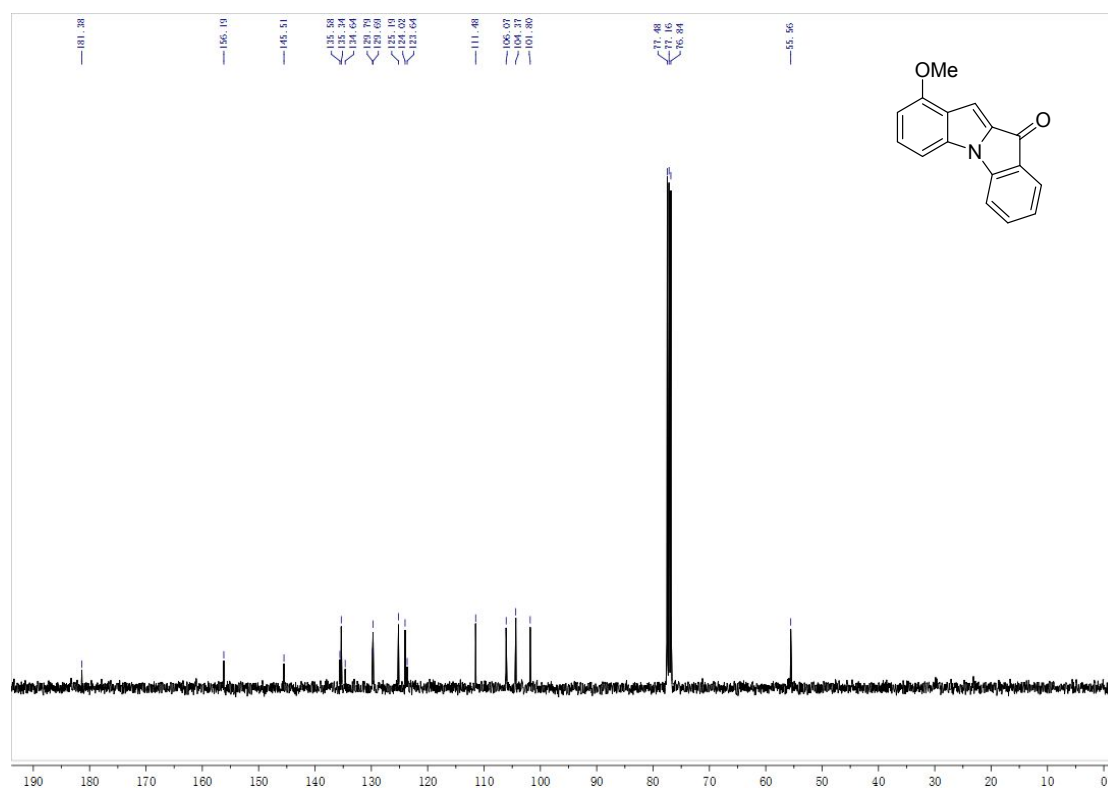

Figure S106.  $^{13}\text{C}\{^1\text{H}\}$  NMR for compound **4u**
